# Supplementary material
Source: PubMed Central journal article supplement (PMC2830615)

NMR Spectra for:

***O*-Acetyl Oximes as Transformable Directing Groups for Pd-Catalyzed C–H Bond  
Functionalization**

Sharon R. Neufeldt and Melanie S. Sanford\*

*Department of Chemistry, University of Michigan  
930 N. University Ave., Ann Arbor, MI 48109*

Data Collected on:  
Zr.Chem.LSA.UMich.edu-inova400  
Archive directory:

Sample directory:

FidFile: PROTON

Pulse Sequence: PROTON (s2pul)  
Solvent: cdcl3  
Data collected on: Oct 18 2009

Temp. 23.0 C / 296.1 K  
Operator: sharose

Relax. delay 0.500 sec  
Pulse 45.0 degrees  
Acq. time 3.500 sec  
Width 6399.5 Hz  
16 repetitions  
OBSERVE H1, 399.9649488 MHz  
DATA PROCESSING  
Line broadening 0.3 Hz  
FT size 65536  
Total time 1 min 12 sec

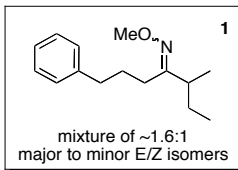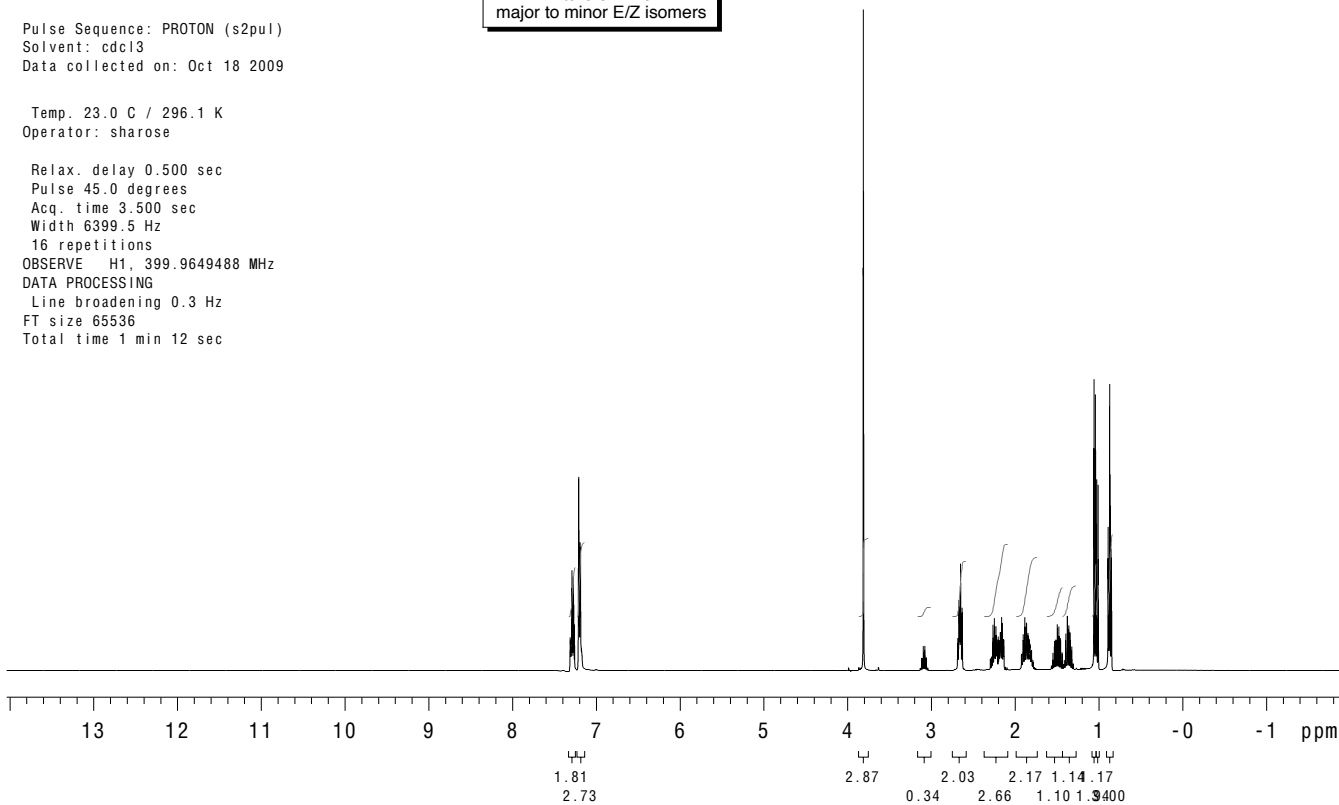

Data Collected on:  
Zr.Chem.LSA.UMich.edu-inova400  
Archive directory:

Sample directory:

FidFile: CARBON

Pulse Sequence: CARBON (s2pul)  
Solvent: cdcl3  
Data collected on: Oct 18 2009

Temp. 23.0 C / 296.1 K  
Operator: sharose

Relax. delay 0.100 sec  
Pulse 45.0 degrees  
Acq. time 2.607 sec  
Width 25141.4 Hz  
160 repetitions  
OBSERVE C13, 100.5712689 MHz  
DECOUPLE H1, 399.9669644 MHz  
Power 39 dB  
continuously on  
WALTZ-16 modulated  
DATA PROCESSING  
Line broadening 1.0 Hz  
FT size 131072  
Total time 45 min

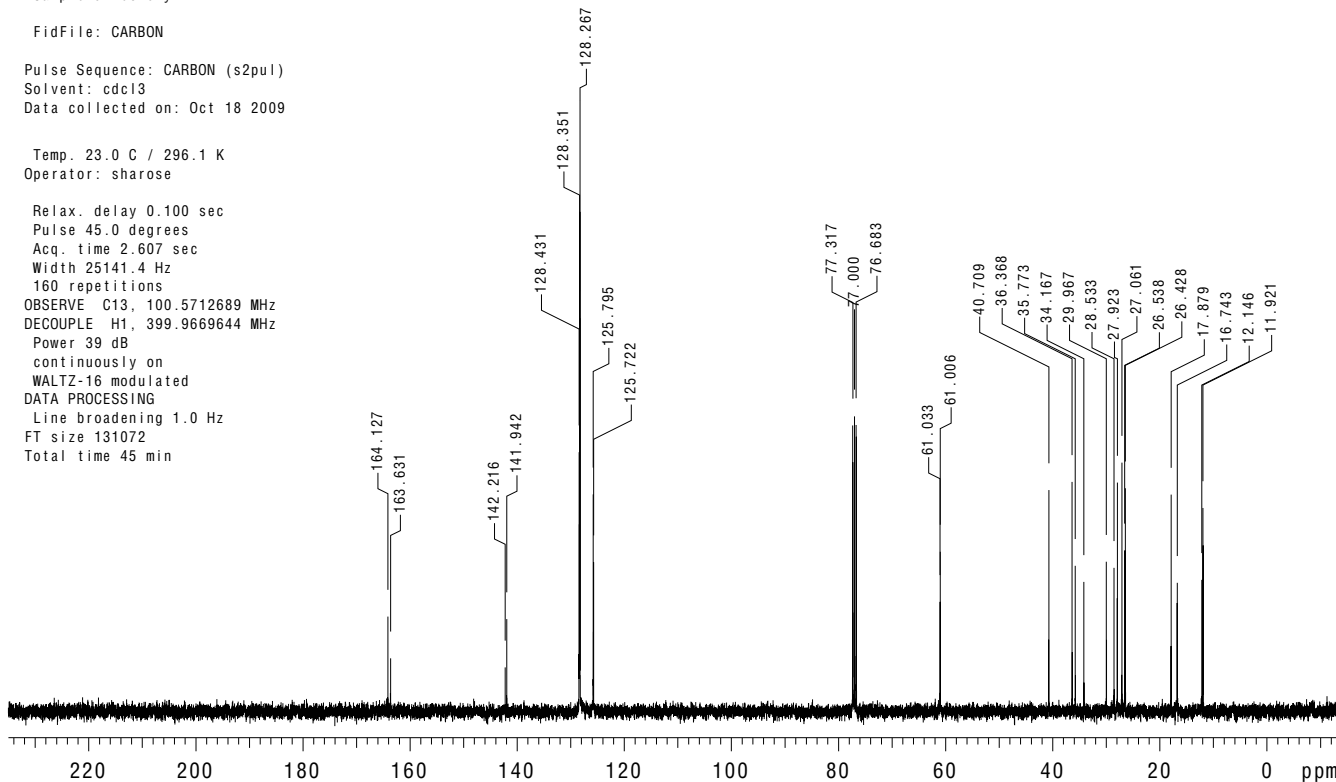

Data Collected on:  
Ga.Chem.LSA.UMich.edu-vnmrs400  
Archive directory:

Sample directory:

FidFile: PROTON

Pulse Sequence: PROTON (s2pul)  
Solvent: cdcl3  
Data collected on: Oct 19 2009

Operator: sharose

Relax. delay 0.500 sec  
Pulse 45.0 degrees  
Acq. time 3.500 sec  
Width 6410.3 Hz  
16 repetitions  
OBSERVE H1, 399.5389191 MHz  
DATA PROCESSING  
Line broadening 0.3 Hz  
FT size 65536  
Total time 1 min 12 sec

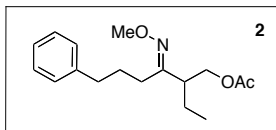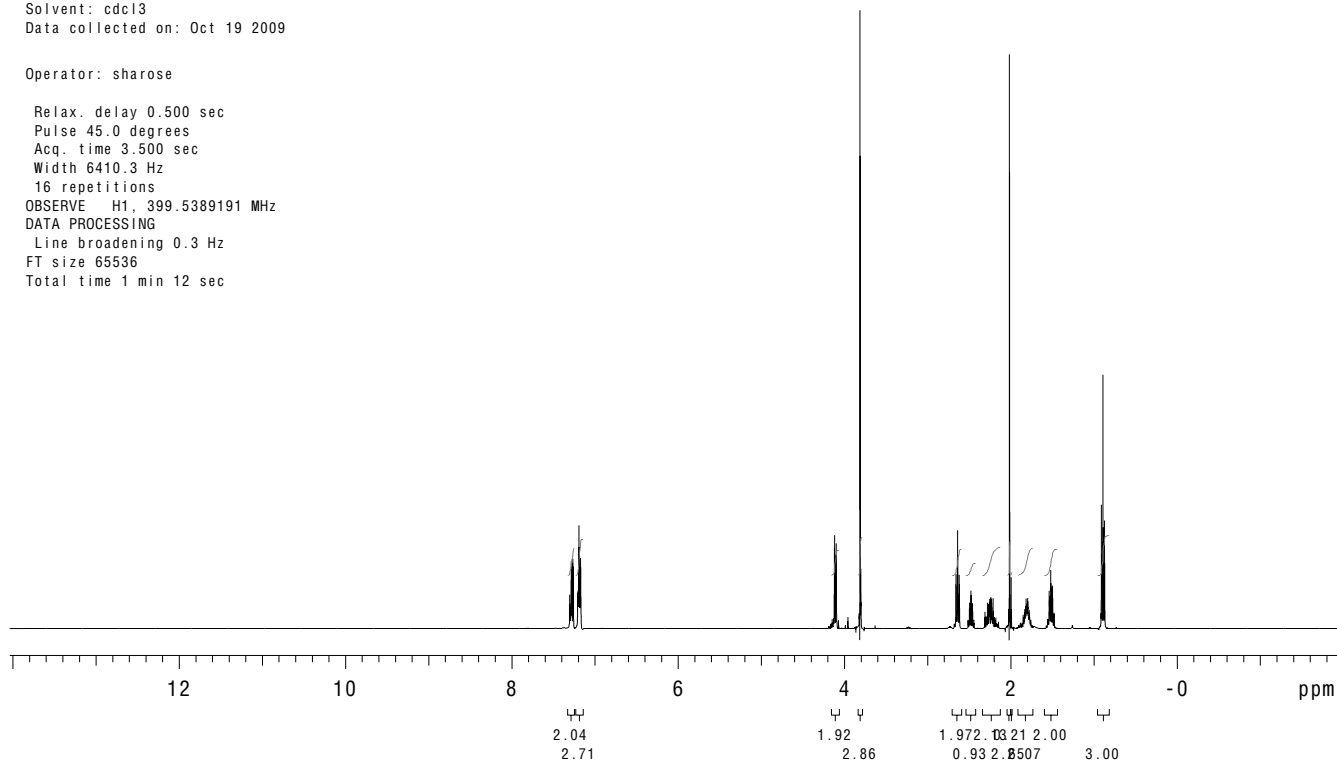

Data Collected on:  
Co.Chem.LSA.UMich.edu-vnmrs400  
Archive directory:

Sample directory:

FidFile: CARBON

Pulse Sequence: CARBON (s2pul)  
Solvent: cdcl3  
Data collected on: Oct 19 2009

Operator: sharose

Relax. delay 0.100 sec  
Pulse 45.0 degrees  
Acq. time 2.569 sec  
Width 25510.2 Hz  
48 repetitions  
OBSERVE C13, 100.7109792 MHz  
DECOUPLE H1, 400.5225704 MHz  
Power 41 dB  
continuously on  
WALTZ-16 modulated  
DATA PROCESSING  
Line broadening 1.0 Hz  
FT size 131072  
Total time 1 hr, 29 min

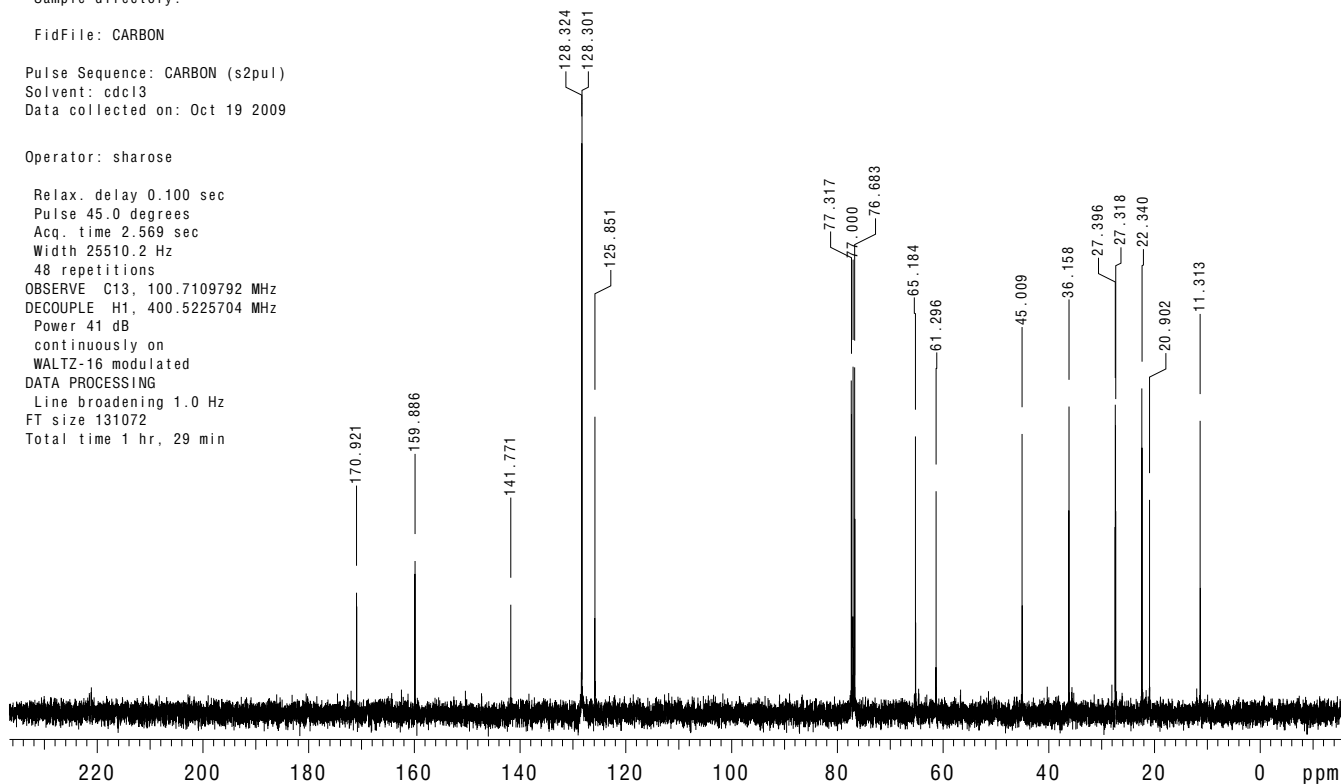

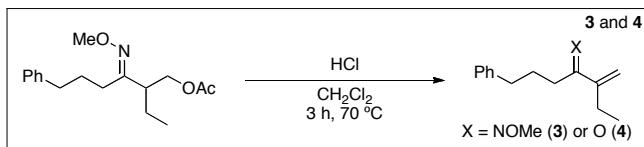

Data Collected on:  
 Sn.Chem.LSA.UMich.edu-inova500  
 Archive directory:

Sample directory:

FidFile: PROTON

Pulse Sequence: PROTON (s2pul)  
 Solvent: cdcl3  
 Data collected on: Oct 26 2009

Operator: sharose

Relax. delay 0.500 sec  
 Pulse 45.0 degrees  
 Acq. time 3.500 sec  
 Width 7998.4 Hz  
 16 repetitions  
 OBSERVE H1, 499.9042604 MHz  
 DATA PROCESSING  
 Line broadening 0.3 Hz  
 FT size 65536  
 Total time 1 min 12 sec

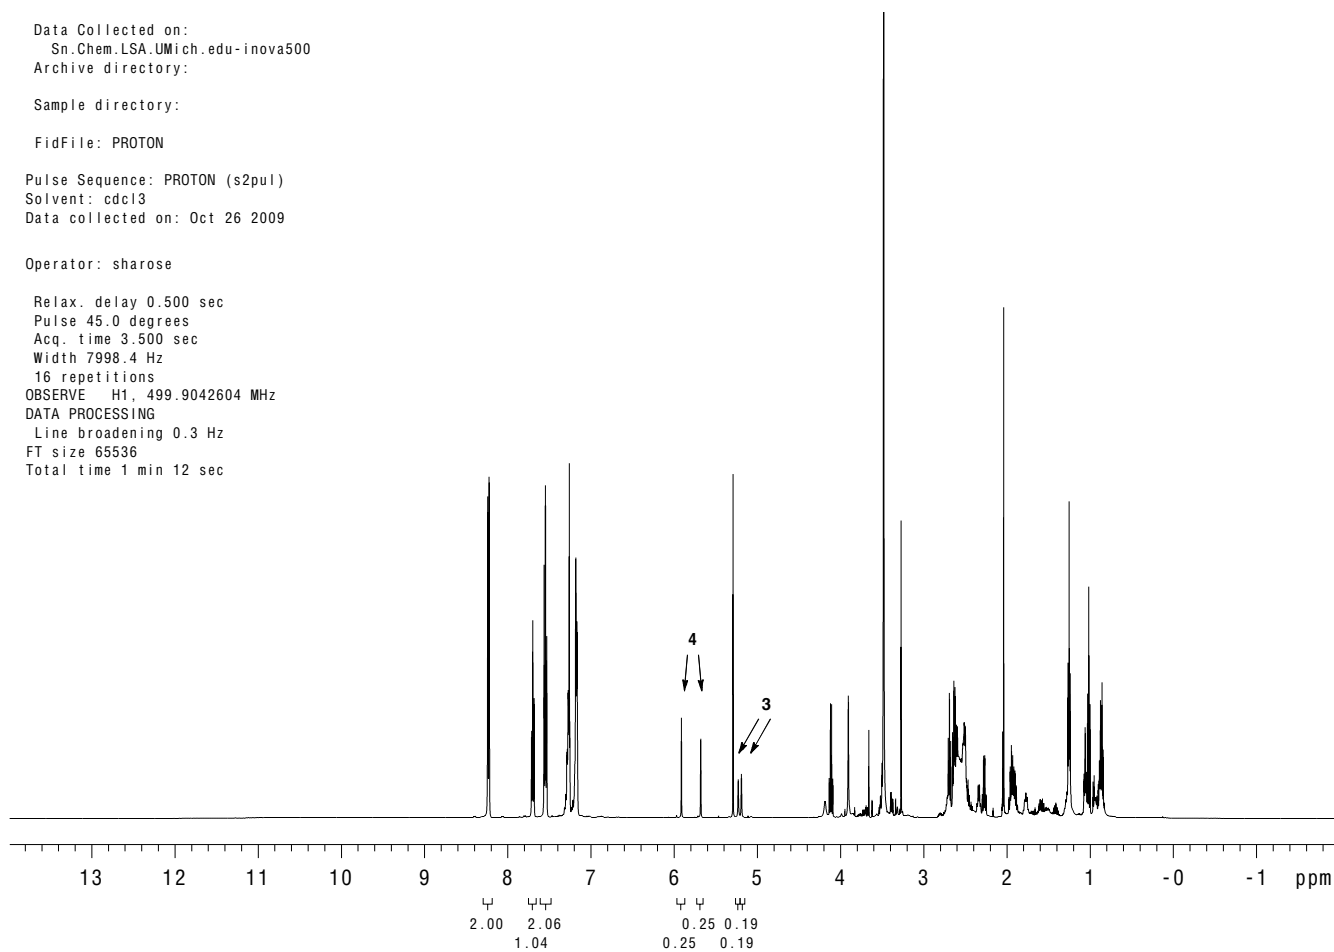



Data Collected on:  
Ga. Chem. LSA.UMich.edu-vnmrs400  
Archive directory:

Sample directory:

FidFile: PROTON

Pulse Sequence: PROTON (s2pul)  
Solvent: cdcl3  
Data collected on: Oct 22 2009

Temp. 25.0 C / 298.1 K  
Operator: sharose

Relax. delay 0.500 sec  
Pulse 45.0 degrees  
Acq. time 3.500 sec  
Width 6410.3 Hz  
16 repetitions  
OBSERVE H1, 399.5389191 MHz  
DATA PROCESSING  
Line broadening 0.3 Hz  
FT size 65536  
Total time 1 min 12 sec

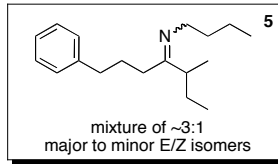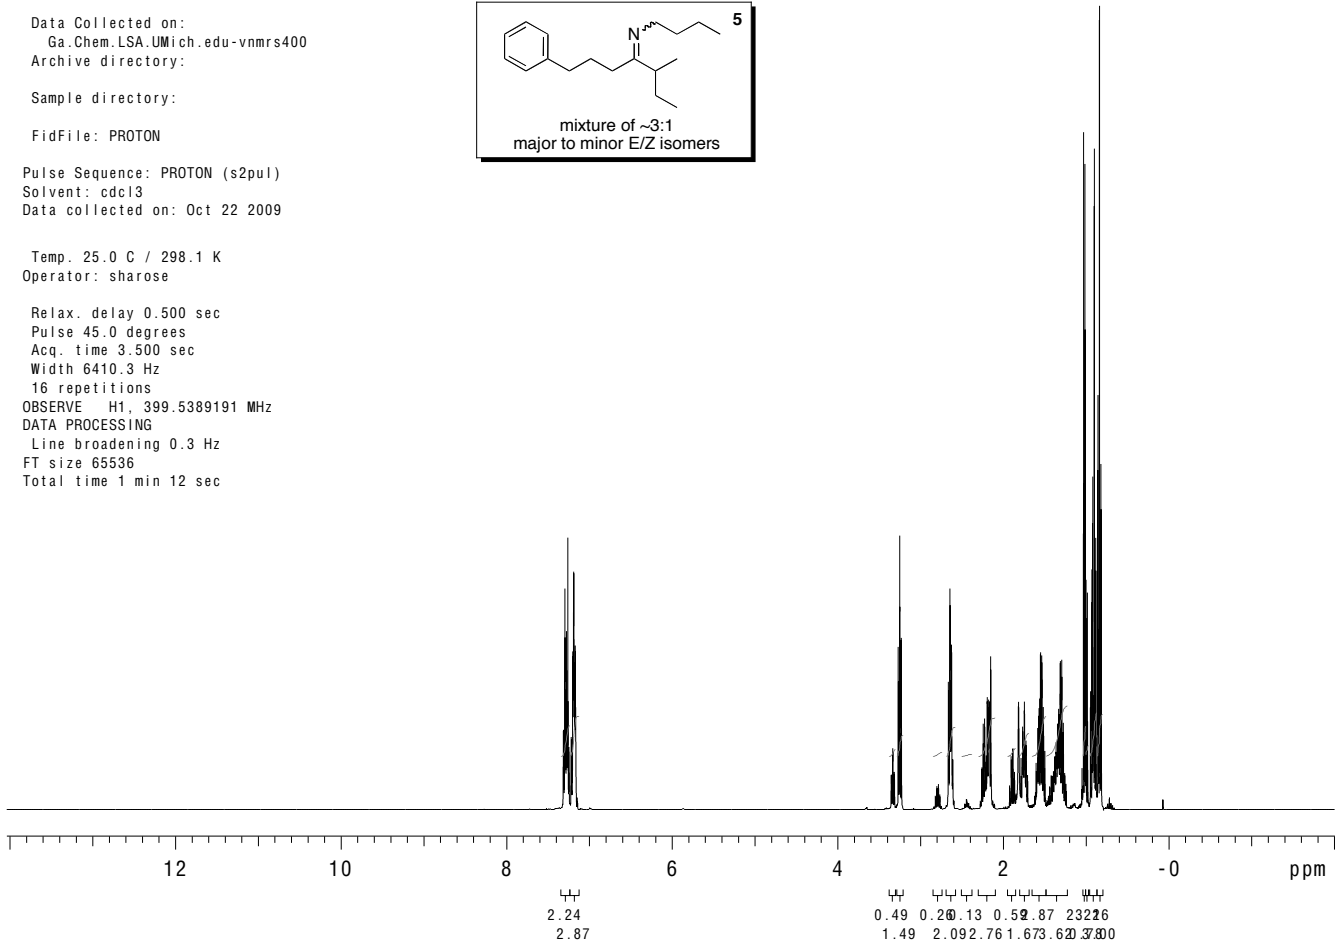

Data Collected on:  
Co. Chem. LSA.UMich.edu-vnmrs400  
Archive directory:

Sample directory:

FidFile: CARBON

Pulse Sequence: CARBON (s2pul)  
Solvent: cdcl3  
Data collected on: Oct 22 2009

Operator: sharose

Relax. delay 0.100 sec  
Pulse 45.0 degrees  
Acq. time 2.569 sec  
Width 25510.2 Hz  
192 repetitions  
OBSERVE C13, 100.7109785 MHz  
DECOUPLE H1, 400.5225704 MHz  
Power 41 dB  
continuously on  
WALTZ-16 modulated  
DATA PROCESSING  
Line broadening 1.0 Hz  
FT size 131072  
Total time 44 min

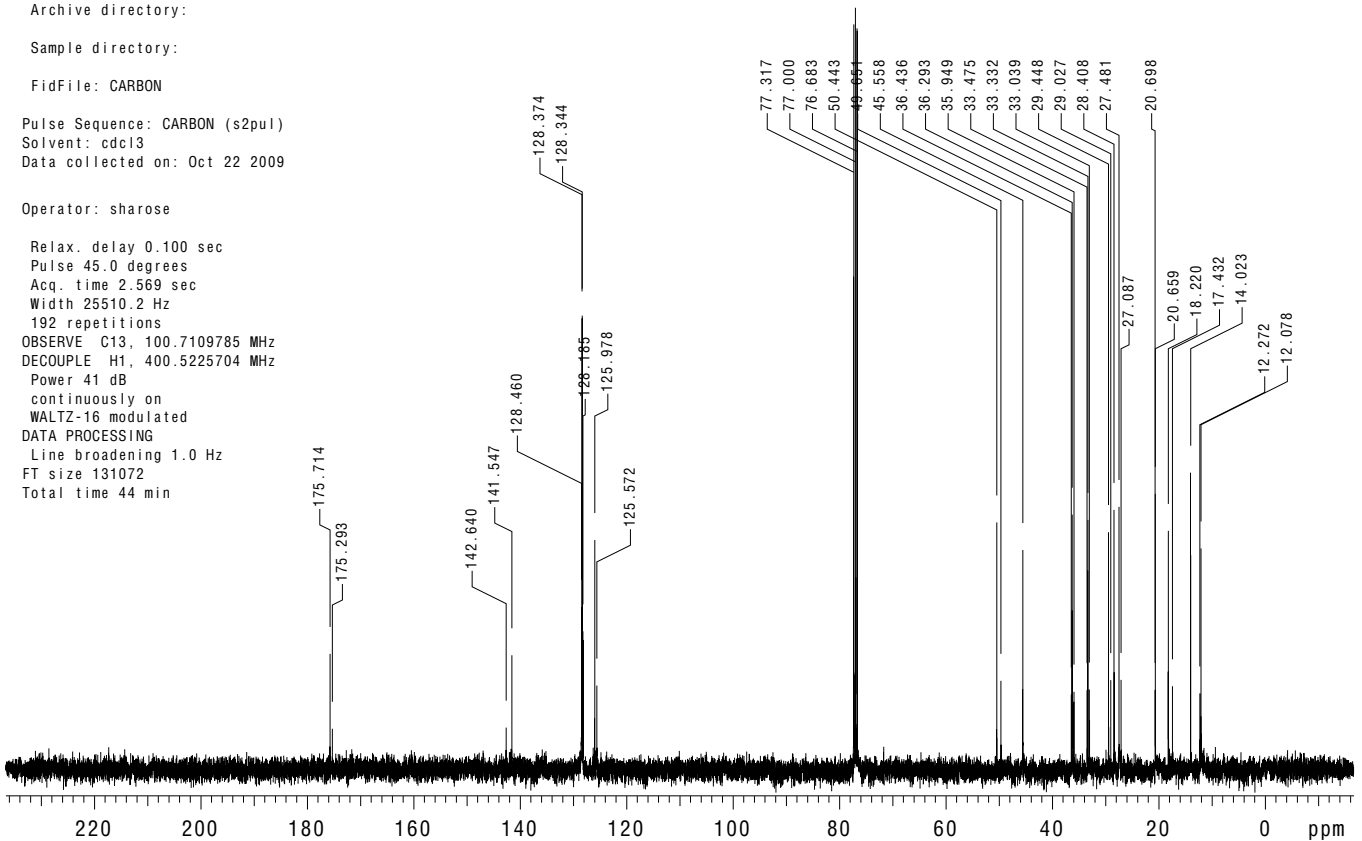

Data Collected on:  
Zr.Chem.LSA.UMich.edu-inova400  
Archive directory:

Sample directory:

FidFile: PROTON

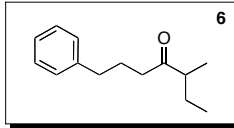

Pulse Sequence: PROTON (s2pul)  
Solvent: cdcl3  
Data collected on: Oct 15 2009

Operator: sharose

Relax. delay 0.500 sec  
Pulse 45.0 degrees  
Acq. time 3.500 sec  
Width 6399.5 Hz  
16 repetitions  
OBSERVE H1, 399.9649491 MHz  
DATA PROCESSING  
Line broadening 0.3 Hz  
FT size 65536  
Total time 1 min 12 sec

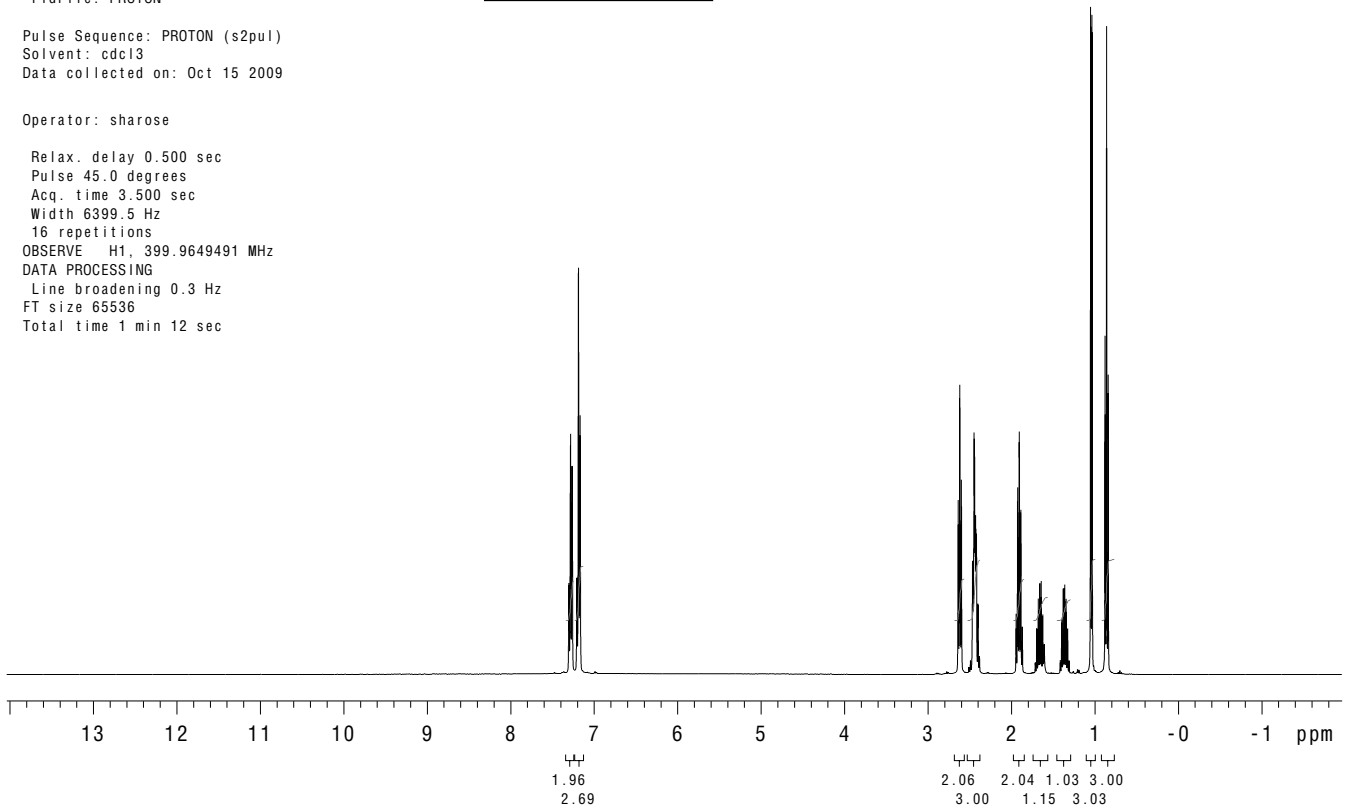

Data Collected on:  
Zr.Chem.LSA.UMich.edu-inova400  
Archive directory:

Sample directory:

FidFile: CARBON

Pulse Sequence: CARBON (s2pul)  
Solvent: cdcl3  
Data collected on: Oct 15 2009

Operator: sharose

Relax. delay 0.100 sec  
Pulse 45.0 degrees  
Acq. time 2.607 sec  
Width 25141.4 Hz  
128 repetitions  
OBSERVE C13, 100.5712685 MHz  
DECOUPLE H1, 399.9669644 MHz  
Power 39 dB  
continuously on  
WALTZ-16 modulated  
DATA PROCESSING  
Line broadening 1.0 Hz  
FT size 131072  
Total time 1 hr, 30 min

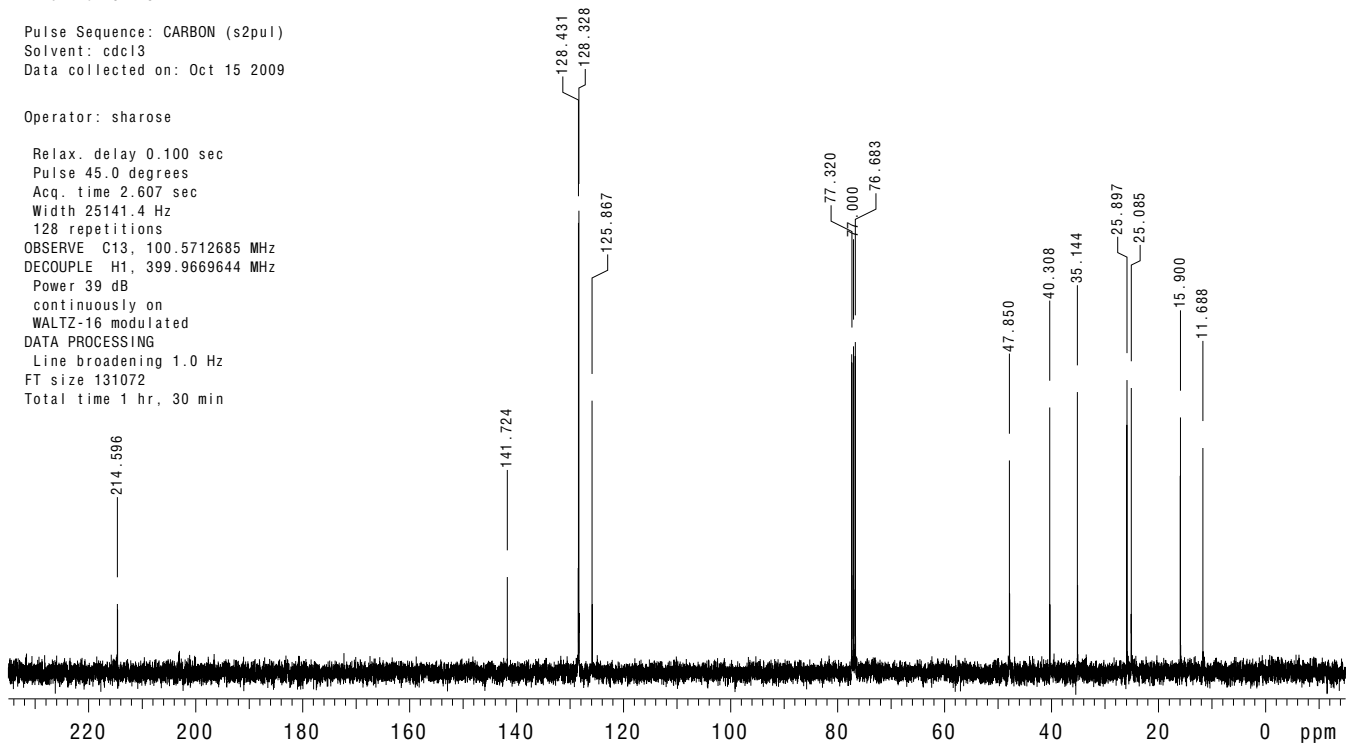

Data Collected on:  
Ga.Chem.LSA.UMich.edu-vnmrs400  
Archive directory:

Sample directory:

FidFile: PROTON

Pulse Sequence: PROTON (s2pul)  
Solvent: cdcl3  
Data collected on: Jun 17 2009

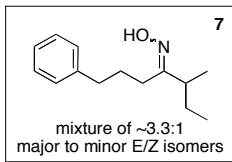

Temp. 23.0 C / 296.1 K  
Operator: sharose

Relax. delay 0.500 sec  
Pulse 45.0 degrees  
Acq. time 3.500 sec  
Width 6410.3 Hz  
16 repetitions  
OBSERVE H1, 399.5389191 MHz  
DATA PROCESSING  
Line broadening 0.3 Hz  
FT size 65536  
Total time 1 min 12 sec

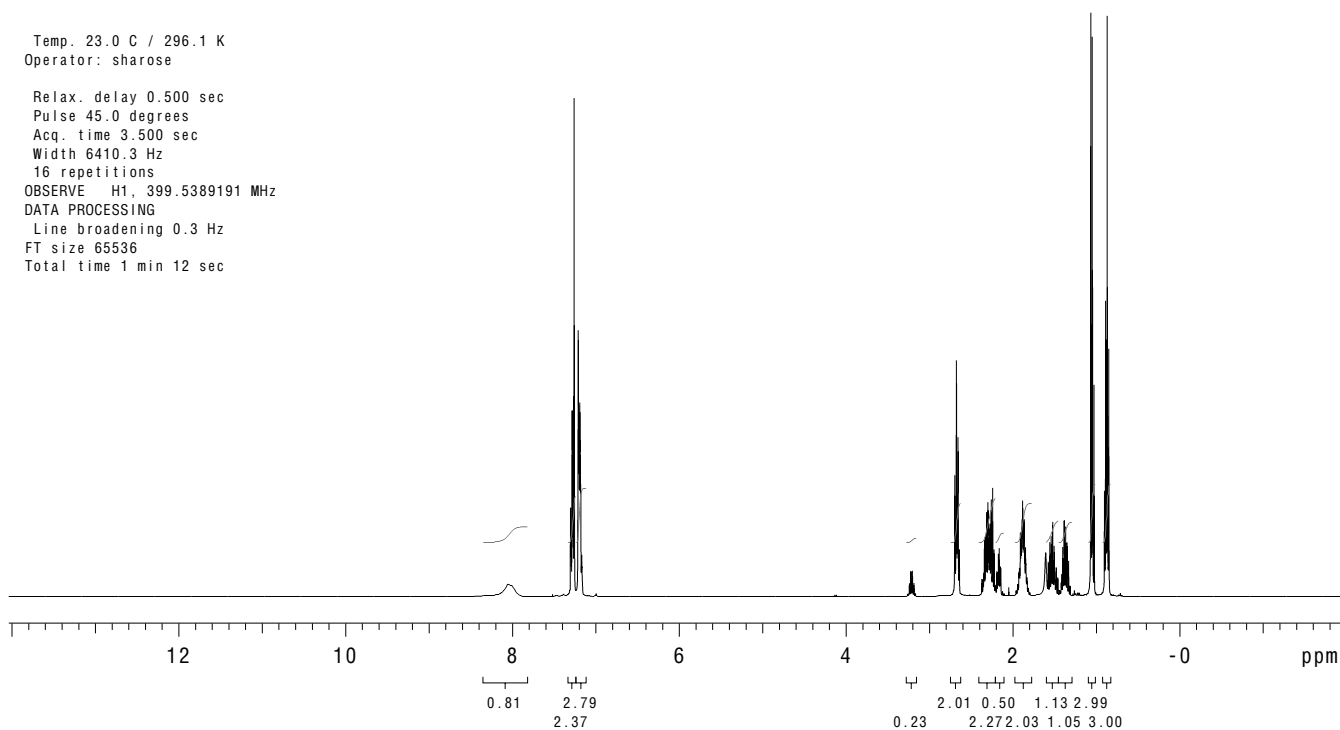

Data Collected on:  
Co.Chem.LSA.UMich.edu-vnmrs400  
Archive directory:

Sample directory:

FidFile: CARBON

Pulse Sequence: CARBON (s2pul)  
Solvent: cdcl3  
Data collected on: Oct 17 2009

Operator: sharose

Relax. delay 0.100 sec  
Pulse 45.0 degrees  
Acq. time 2.569 sec  
Width 25510.2 Hz  
48 repetitions  
OBSERVE C13, 100.7109835 MHz  
DECOUPLE H1, 400.5225704 MHz  
Power 41 dB  
continuously on  
WALTZ-16 modulated  
DATA PROCESSING  
Line broadening 1.0 Hz  
FT size 131072  
Total time 22 min

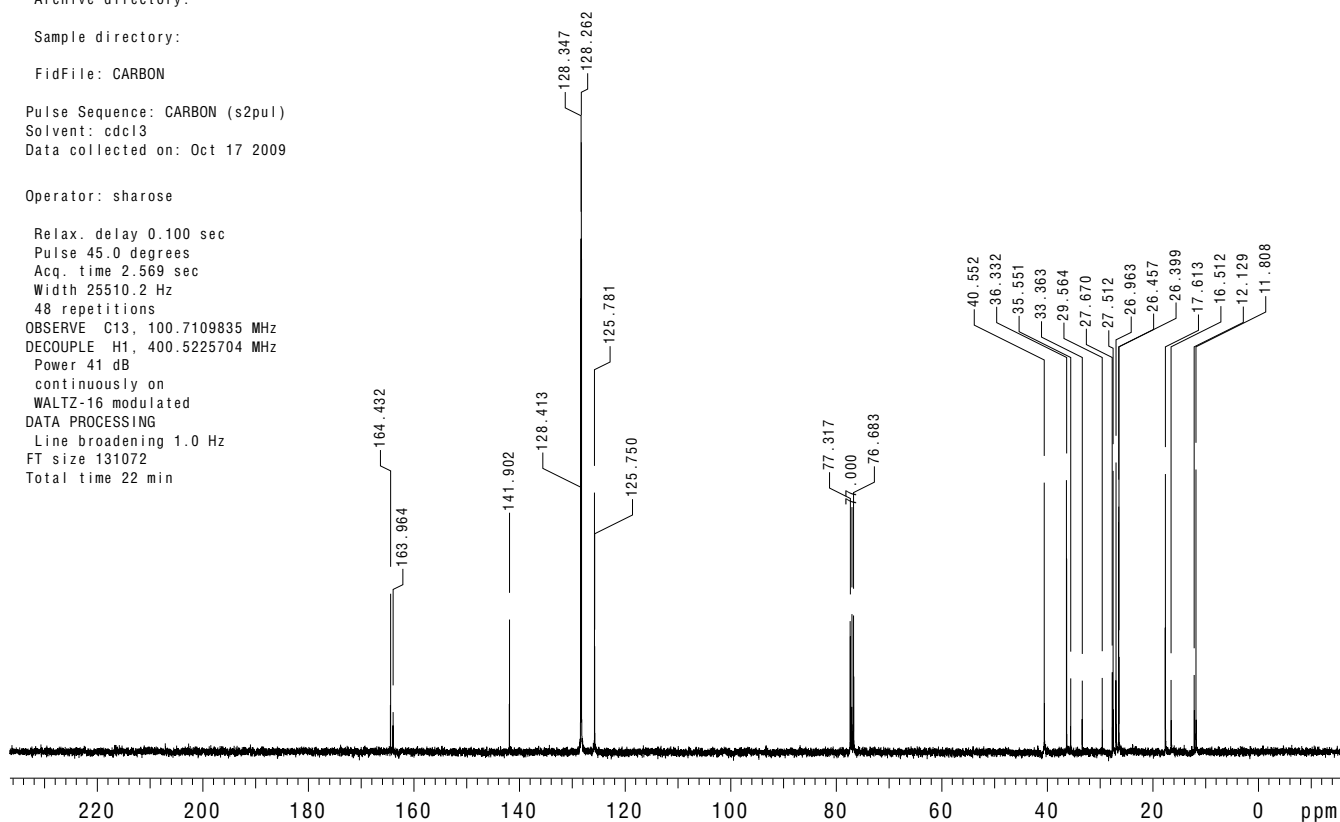

Data Collected on:  
Zr.Chem.LSA.UMich.edu-inova400  
Archive directory:  
/export/home/chempack/vnmrsys/data  
Sample directory:

FidFile: 2SRN187\_clean\_1H

Pulse Sequence: PROTON (s2pul)  
Solvent: cdcl3  
Data collected on: Nov 11 2009

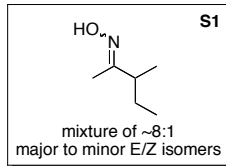

Temp. 25.0 C / 298.1 K  
Operator: sharose

Relax. delay 0.500 sec  
Pulse 45.0 degrees  
Acq. time 3.500 sec  
Width 6399.5 Hz  
16 repetitions  
OBSERVE H1, 399.9649488 MHz  
DATA PROCESSING  
Line broadening 0.3 Hz  
FT size 65536  
Total time 1 min 12 sec

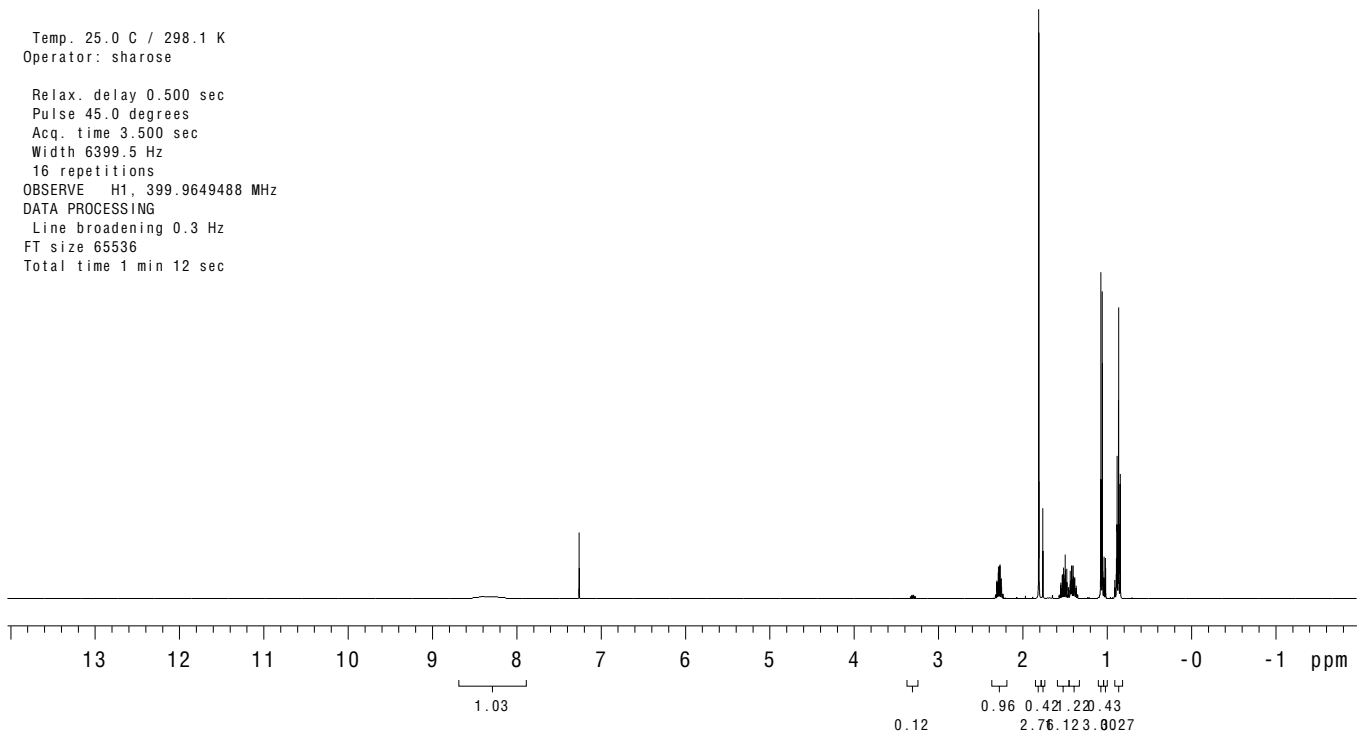

Data Collected on:  
Co.Chem.LSA.UMich.edu-vnmrs400  
Archive directory:

Sample directory:

FidFile: CARBON

Pulse Sequence: CARBON (s2pul)  
Solvent: cdcl3  
Data collected on: Oct 10 2009

Operator: sharose

Relax. delay 0.100 sec  
Pulse 45.0 degrees  
Acq. time 2.569 sec  
Width 25510.2 Hz  
240 repetitions  
OBSERVE C13, 100.7109769 MHz  
DECOUPLE H1, 400.5225704 MHz  
Power 41 dB  
continuously on  
WALTZ-16 modulated  
DATA PROCESSING  
Line broadening 1.0 Hz  
FT size 131072  
Total time 1 hr, 29 min

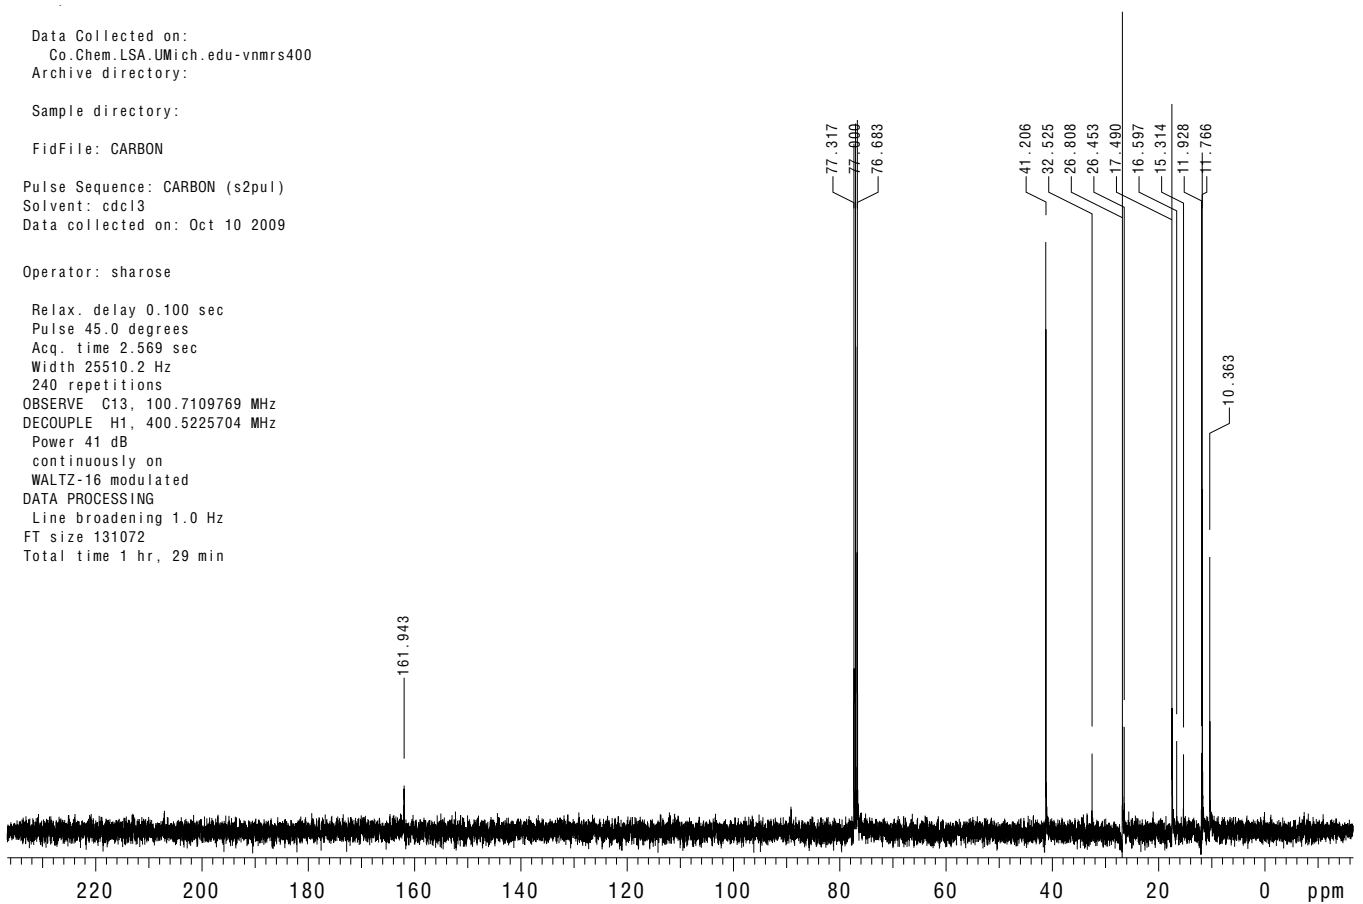

Data Collected on:  
Zr.Chem.LSA.UMich.edu-inova400  
Archive directory:

Sample directory:

FidFile: PROTON

Pulse Sequence: PROTON (s2pul)  
Solvent: cdcl3  
Data collected on: Aug 4 2009

Temp. 25.0 C / 298.1 K  
Operator: sharose

Relax. delay 0.500 sec  
Pulse 45.0 degrees  
Acq. time 3.500 sec  
Width 6399.5 Hz  
16 repetitions  
OBSERVE H1, 399.9649488 MHz  
DATA PROCESSING  
Line broadening 0.3 Hz  
FT size 65536  
Total time 1 min 12 sec

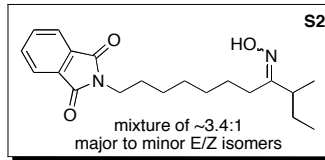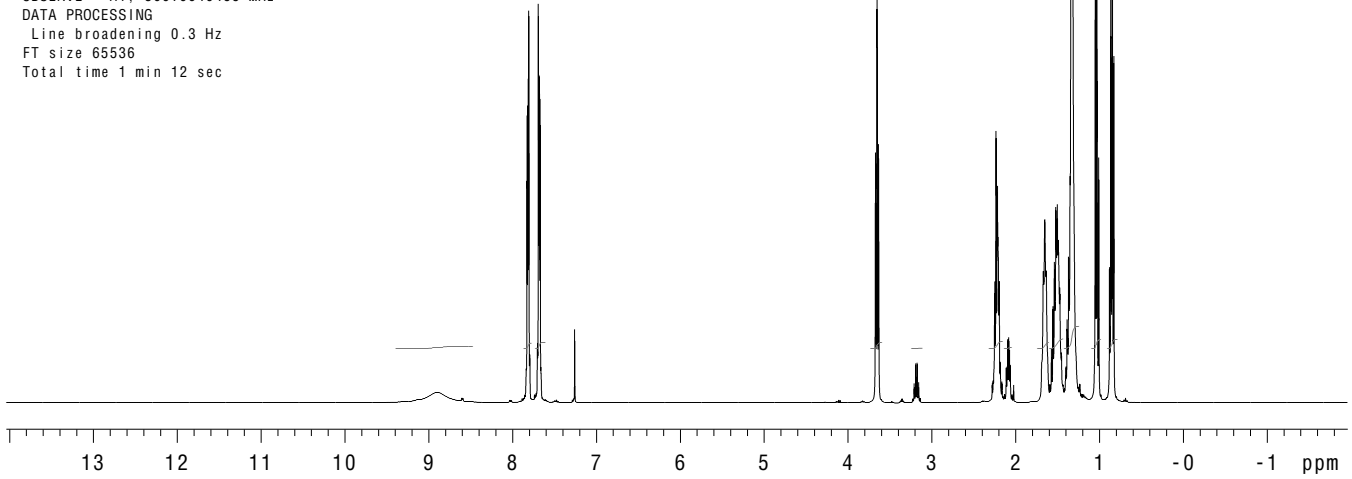

Data Collected on:  
Zr.Chem.LSA.UMich.edu-inova400  
Archive directory:

Sample directory:

FidFile: CARBON

Pulse Sequence: CARBON (s2pul)  
Solvent: cdcl3  
Data collected on: Aug 4 2009

Temp. 25.0 C / 298.1 K  
Operator: sharose

Relax. delay 0.100 sec  
Pulse 45.0 degrees  
Acq. time 2.607 sec  
Width 25141.4 Hz  
128 repetitions  
OBSERVE C13, 100.5712704 MHz  
DECOUPLE H1, 399.9669644 MHz  
Power 39 dB  
continuously on  
WALTZ-16 modulated  
DATA PROCESSING  
Line broadening 1.0 Hz  
FT size 131072  
Total time 45 min

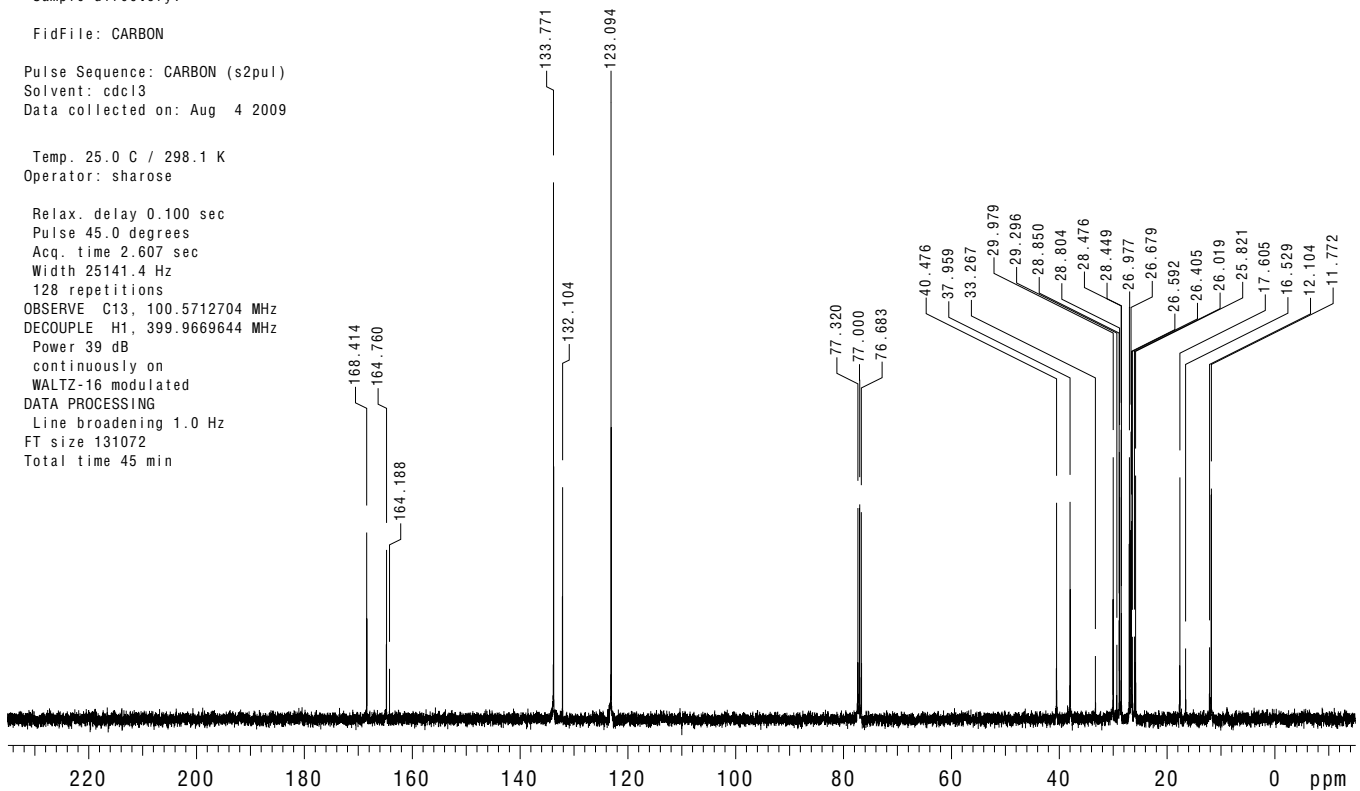

Data Collected on:  
Zr.Chem.LSA.UMich.edu-inova400  
Archive directory:  
/export/home/chempack/vnmrsys/data  
Sample directory:

FidFile: 3SRN275a\_1H

Pulse Sequence: PROTON (s2pul)  
Solvent: cdcl3  
Data collected on: Nov 11 2009

Temp. 25.0 C / 298.1 K  
Operator: sharose

Relax. delay 0.500 sec  
Pulse 45.0 degrees  
Acq. time 3.500 sec  
Width 6399.5 Hz  
8 repetitions  
OBSERVE H1, 399.9649490 MHz  
DATA PROCESSING  
Line broadening 0.3 Hz  
FT size 65536  
Total time 0 min 40 sec

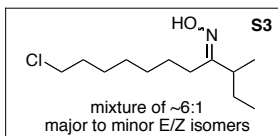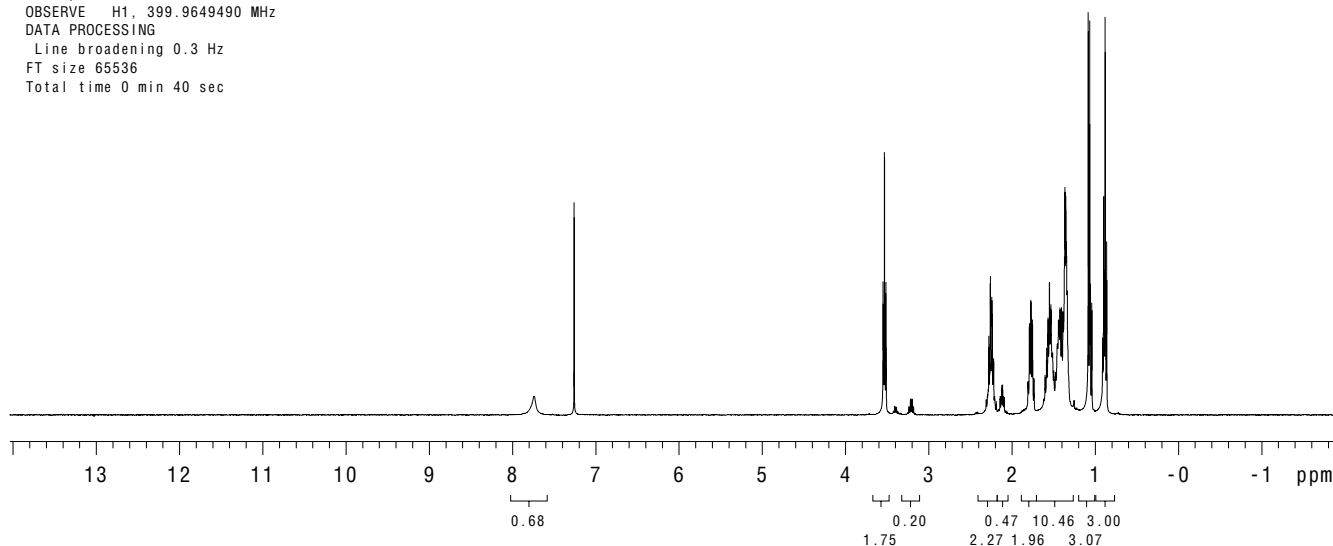

Data Collected on:  
Zr.Chem.LSA.UMich.edu-inova400  
Archive directory:

Sample directory:

FidFile: CARBON

Pulse Sequence: CARBON (s2pul)  
Solvent: cdcl3  
Data collected on: Aug 3 2009

Temp. 25.0 C / 298.1 K  
Operator: sharose

Relax. delay 0.100 sec  
Pulse 45.0 degrees  
Acq. time 2.607 sec  
Width 25141.4 Hz  
128 repetitions  
OBSERVE C13, 100.5712666 MHz  
DECOUPLE H1, 399.9669644 MHz  
Power 39 dB  
continuously on  
WALTZ-16 modulated  
DATA PROCESSING  
Line broadening 1.0 Hz  
FT size 131072  
Total time 11 min

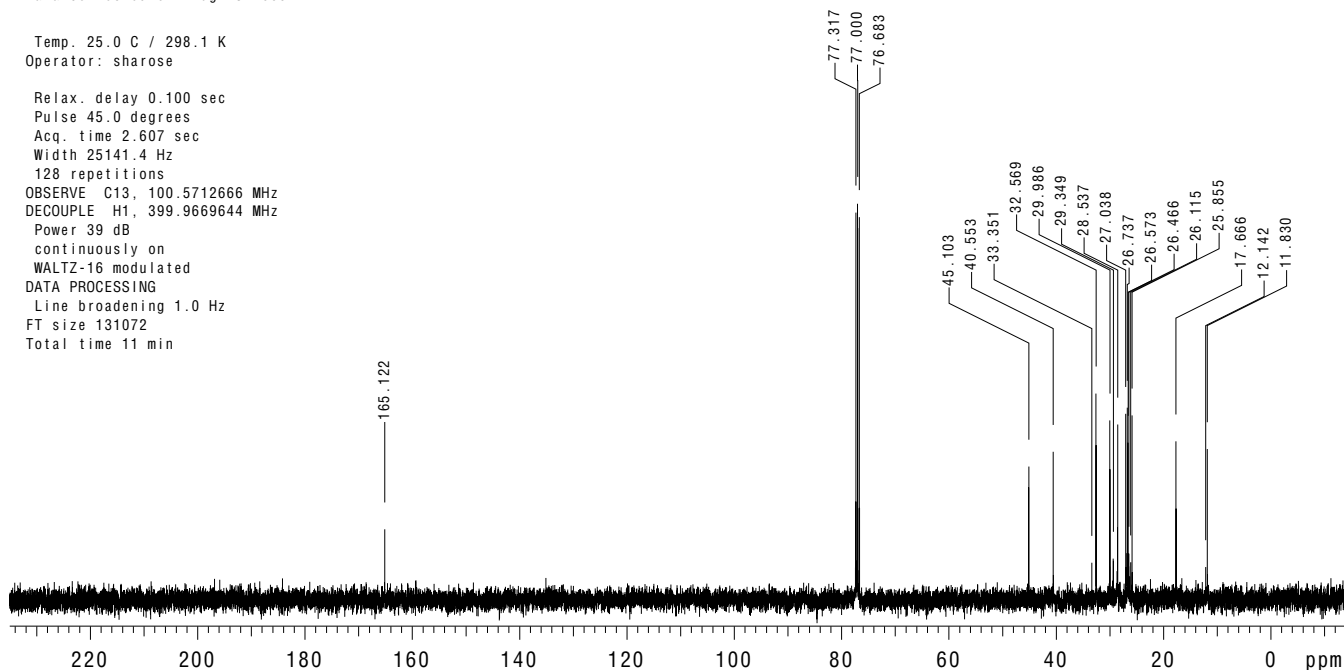

Data Collected on:  
Sn.Chem.LSA.UMich.edu-inova500  
Archive directory:

Sample directory:

FidFile: PROTON

Pulse Sequence: PROTON (s2pul)  
Solvent: cdcl3  
Data collected on: Jun 23 2009

Operator: sharose

Relax. delay 0.500 sec  
Pulse 45.0 degrees  
Acq. time 3.500 sec  
Width 7998.4 Hz  
16 repetitions  
OBSERVE H1, 499.9042606 MHz  
DATA PROCESSING  
Line broadening 0.3 Hz  
FT size 65536  
Total time 1 min 12 sec

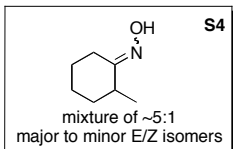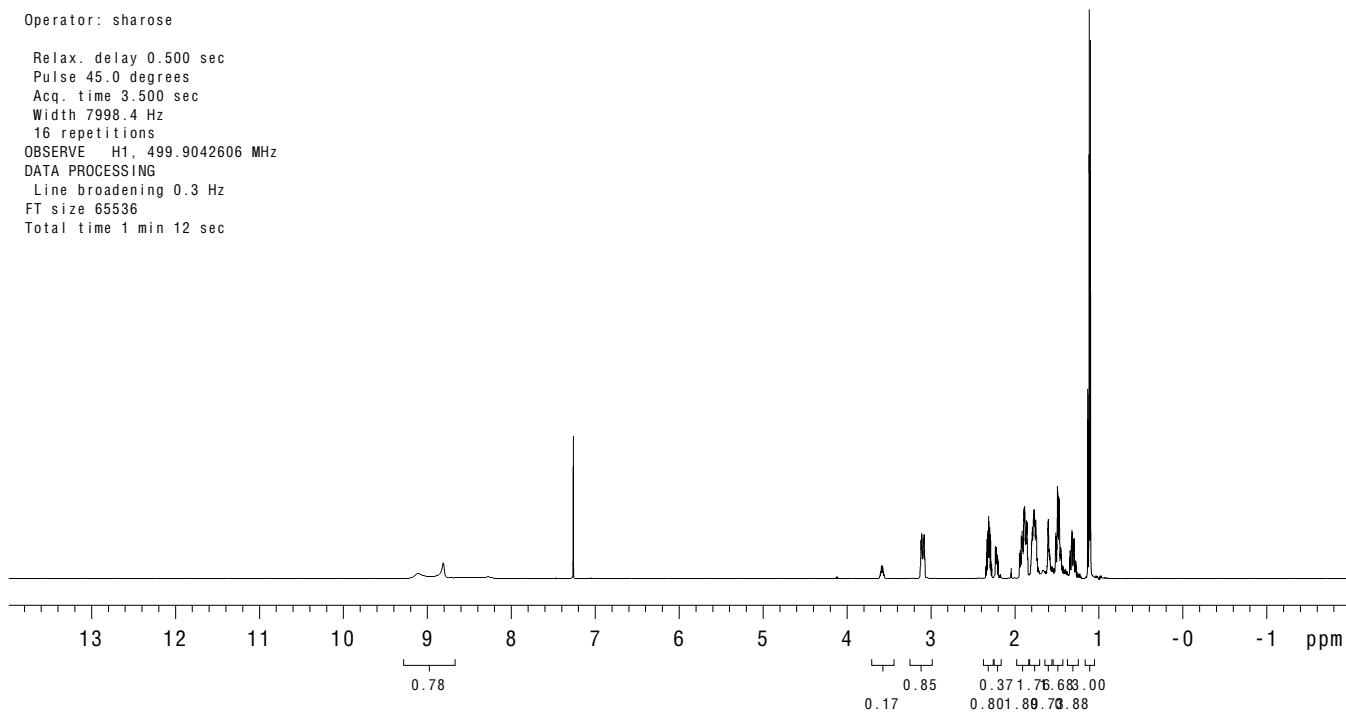

Data Collected on:  
Co.Chem.LSA.UMich.edu-vnmrs400  
Archive directory:

Sample directory:

FidFile: CARBON

Pulse Sequence: CARBON (s2pul)  
Solvent: cdcl3  
Data collected on: Oct 10 2009

Operator: sharose

Relax. delay 0.100 sec  
Pulse 45.0 degrees  
Acq. time 2.569 sec  
Width 25510.2 Hz  
112 repetitions  
OBSERVE C13, 100.7109773 MHz  
DECOUPLE H1, 400.5225704 MHz  
Power 41 dB  
continuously on  
WALTZ-16 modulated  
DATA PROCESSING  
Line broadening 1.0 Hz  
FT size 131072  
Total time 44 min

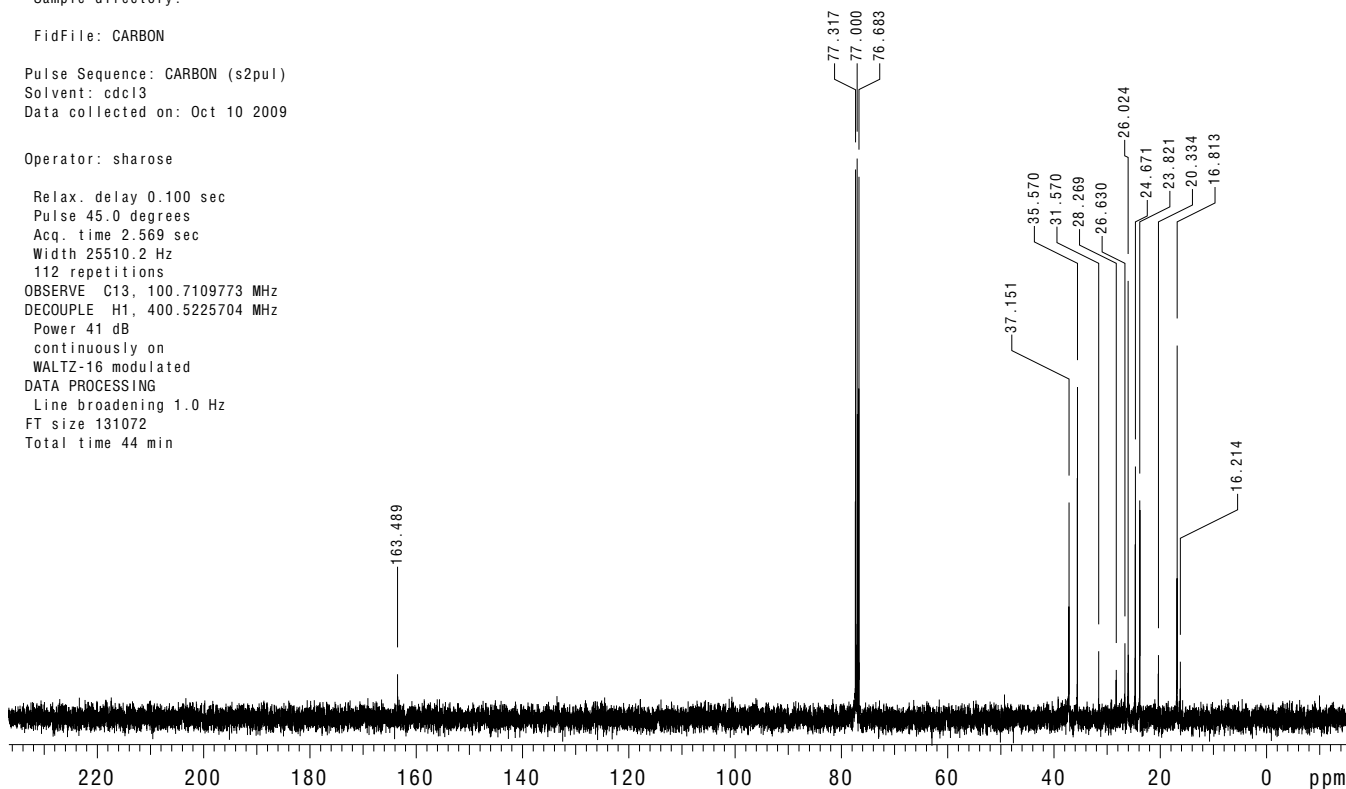

Data Collected on:  
Sn.Chem.LSA.UMich.edu-inova500  
Archive directory:

Sample directory:

FidFile: PROTON

Pulse Sequence: PROTON (s2pul)  
Solvent: cdcl3  
Data collected on: Jul 23 2009

Operator: sharose

Relax. delay 0.500 sec  
Pulse 45.0 degrees  
Acq. time 3.500 sec  
Width 7998.4 Hz  
16 repetitions  
OBSERVE H1, 499.9042606 MHz  
DATA PROCESSING  
Line broadening 0.3 Hz  
FT size 65536  
Total time 1 min 12 sec

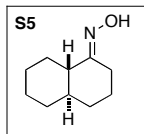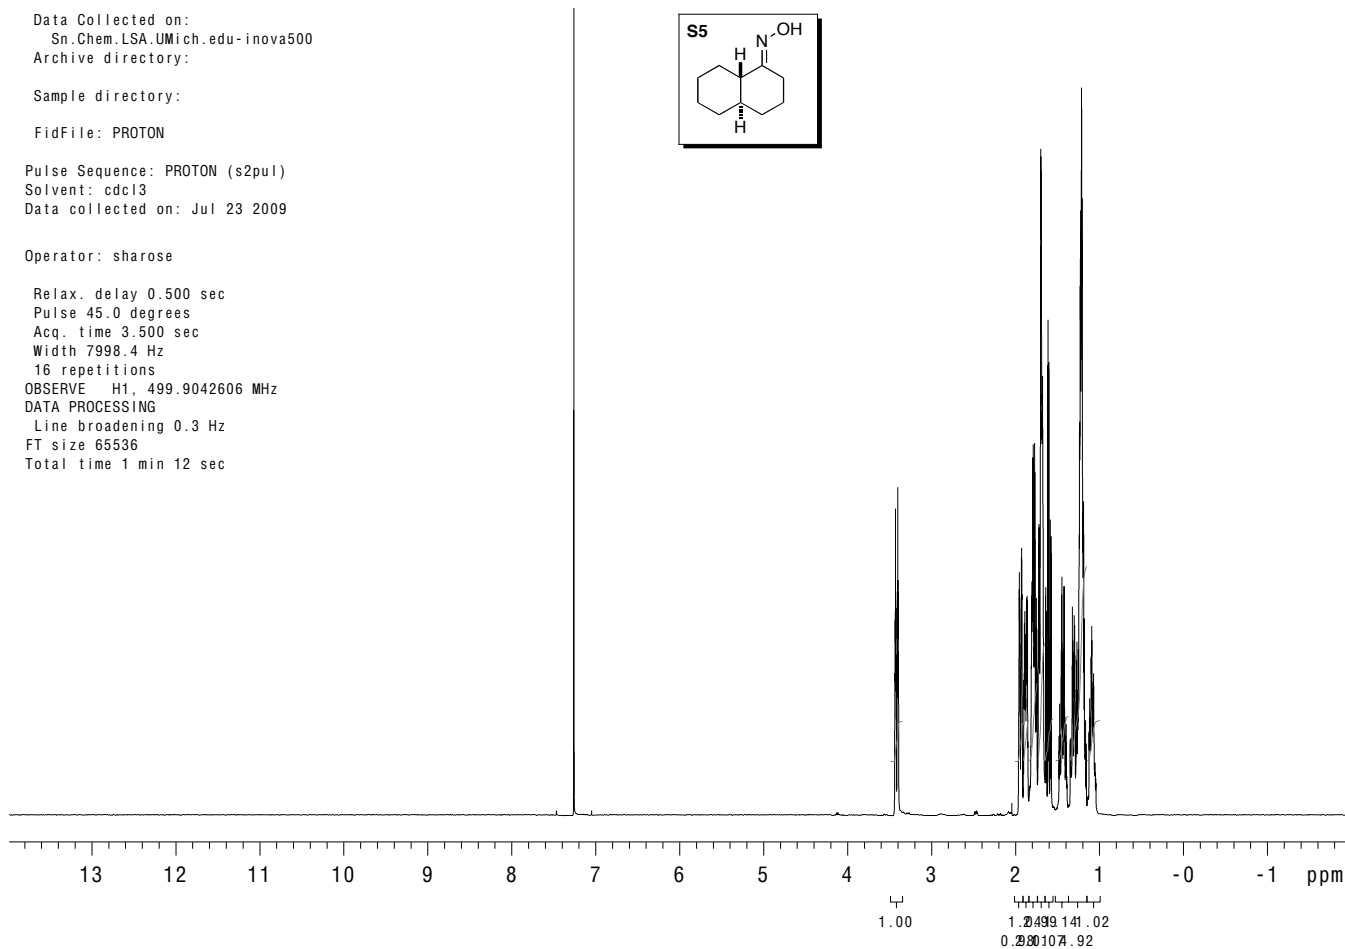

Data Collected on:  
Co.Chem.LSA.UMich.edu-vnmrs400  
Archive directory:

Sample directory:

FidFile: CARBON

Pulse Sequence: CARBON (s2pul)  
Solvent: cdcl3  
Data collected on: Oct 10 2009

Operator: sharose

Relax. delay 0.100 sec  
Pulse 45.0 degrees  
Acq. time 2.569 sec  
Width 25510.2 Hz  
32 repetitions  
OBSERVE C13, 100.7109785 MHz  
DECOUPLE H1, 400.5225704 MHz  
Power 41 dB  
continuously on  
WALTZ-16 modulated  
DATA PROCESSING  
Line broadening 1.0 Hz  
FT size 131072  
Total time 1 hr, 29 min

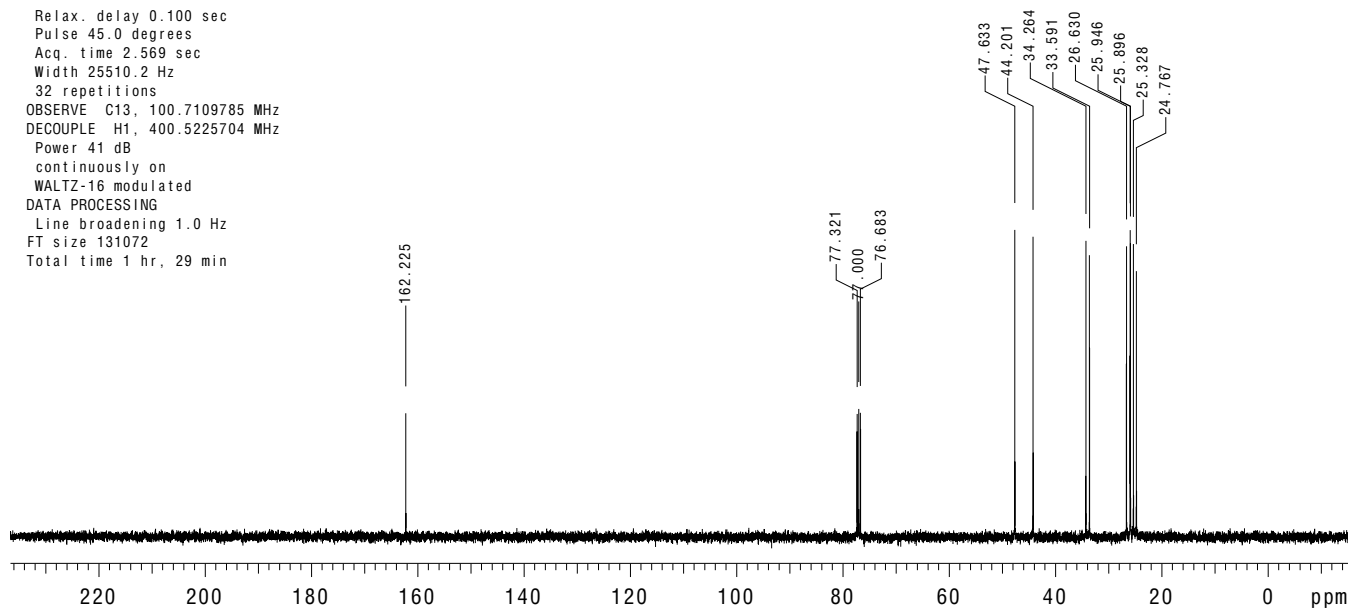



Data Collected on:  
Zr.Chem.LSA.UMich.edu-inova400  
Archive directory:  
/export/home/chempack/vnmrsys/data  
Sample directory:

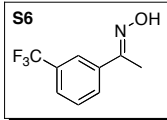

FidFile: PROTON

Pulse Sequence: PROTON (s2pul)  
Solvent: cdcl3  
Data collected on: Nov 10 2009

Temp. 25.0 C / 298.1 K  
Operator: sharose

Relax. delay 0.500 sec  
Pulse 45.0 degrees  
Acq. time 3.500 sec  
Width 6399.5 Hz  
16 repetitions  
OBSERVE H1, 399.9649488 MHz  
DATA PROCESSING  
Line broadening 0.3 Hz  
FT size 65536  
Total time 1 min 12 sec

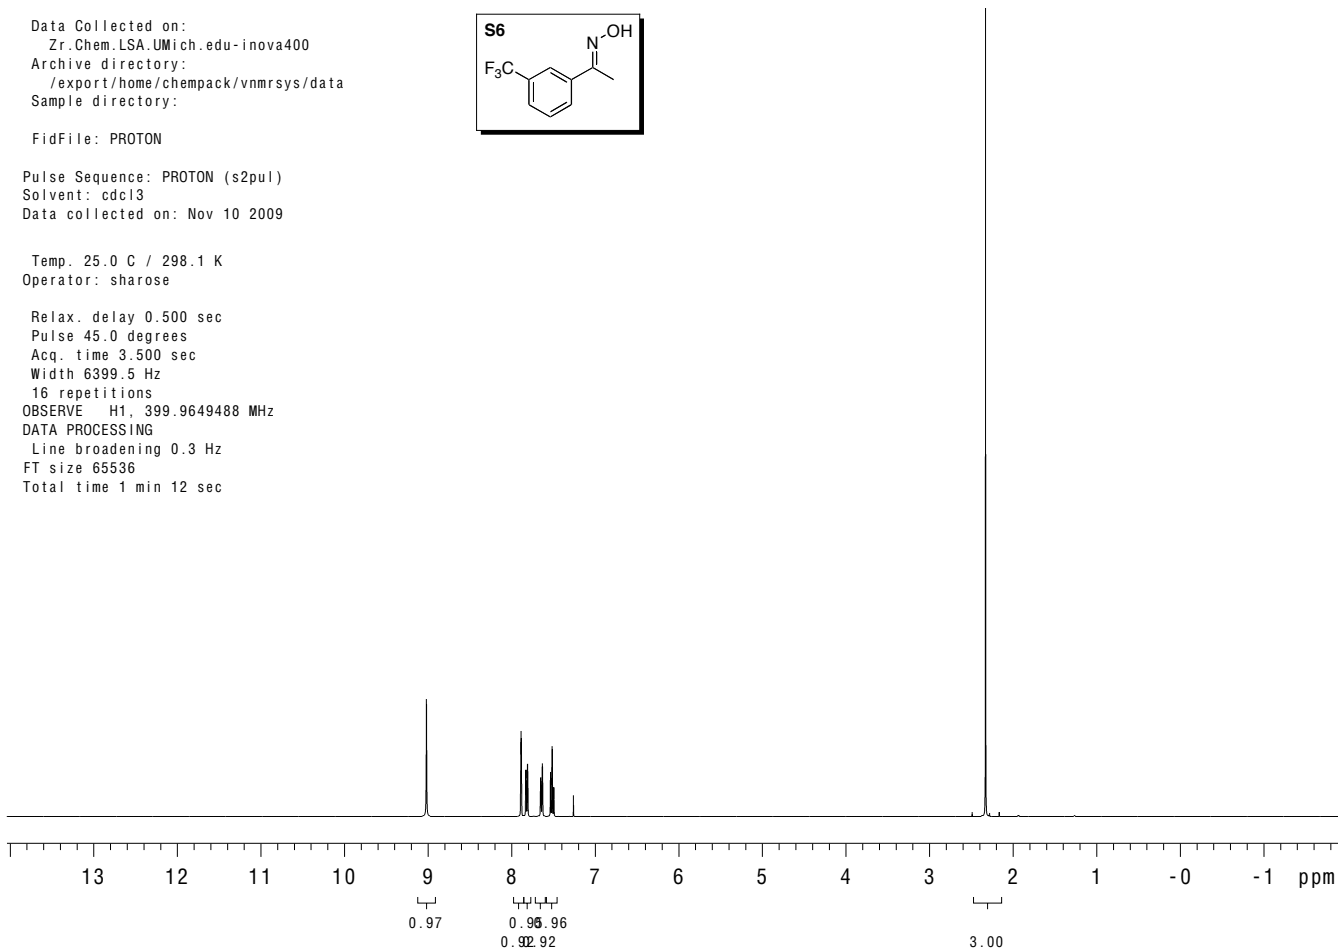

Data Collected on:  
Zr.Chem.LSA.UMich.edu-inova400  
Archive directory:

Sample directory:

FidFile: CARBON

Pulse Sequence: CARBON (s2pul)  
Solvent: cdcl3  
Data collected on: Nov 10 2009

Temp. 25.0 C / 298.1 K  
Operator: sharose

Relax. delay 0.100 sec  
Pulse 45.0 degrees  
Acq. time 2.607 sec  
Width 25141.4 Hz  
576 repetitions  
OBSERVE C13, 100.5712658 MHz  
DECOUPLE H1, 399.9669644 MHz  
Power 39 dB  
continuously on  
WALTZ-16 modulated  
DATA PROCESSING  
Line broadening 1.0 Hz  
FT size 131072  
Total time 45 min

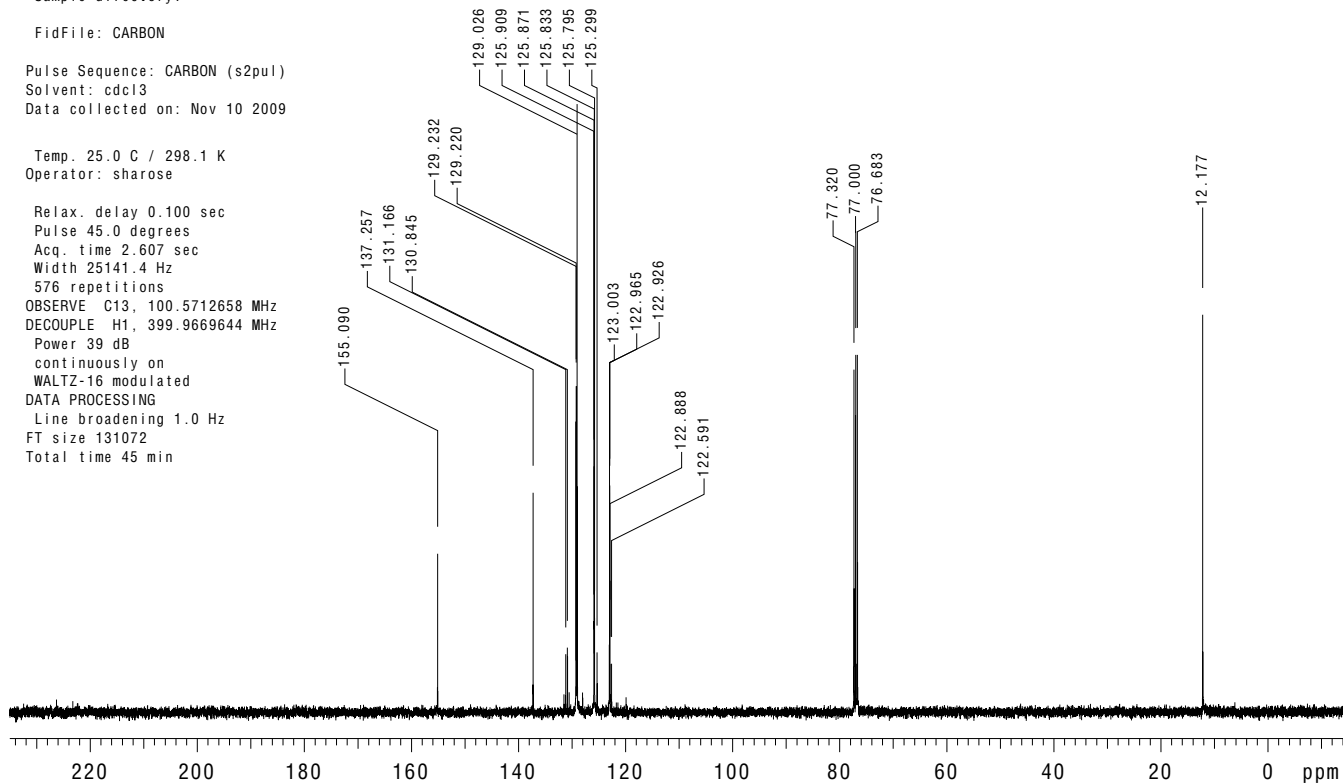

Data Collected on:  
Co.Chem.LSA.UMich.edu-vnmrs400  
Archive directory:

Sample directory:

FidFile: FLUORINE

Pulse Sequence: FLUORINE (s2pul)  
Solvent: cdcl3  
Data collected on: Nov 10 2009

Temp. 25.0 C / 298.1 K  
Operator: sharose

Relax. delay 1.000 sec  
Pulse 30.0 degrees  
Acq. time 0.734 sec  
Width 89285.7 Hz  
16 repetitions

OBSERVE F19, 376.8658672 MHz  
DATA PROCESSING  
Line broadening 0.5 Hz  
FT size 131072  
Total time 0 min 31 sec

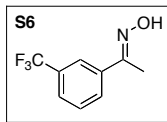

-62.797

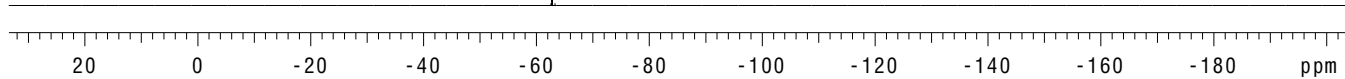

Sample Name:

Archive directory:

Sample directory:

FidFile: Proton

Pulse Sequence: Proton (s2pul)

Solvent: cdcl3

Data collected on: Oct 1 2008

Operator: sharose

VNMRS-500 "Dy.Chem.LSA.UMich.edu"

Relax. delay 0.100 sec

Pulse 45.0 degrees

Acq. time 3.000 sec

Width 8003.2 Hz

16 repetitions

OBSERVE H1, 499.9042595 MHz

DATA PROCESSING

Line broadening 0.2 Hz

FT size 65536

Total time 0 min 24 sec

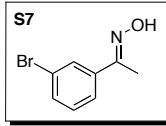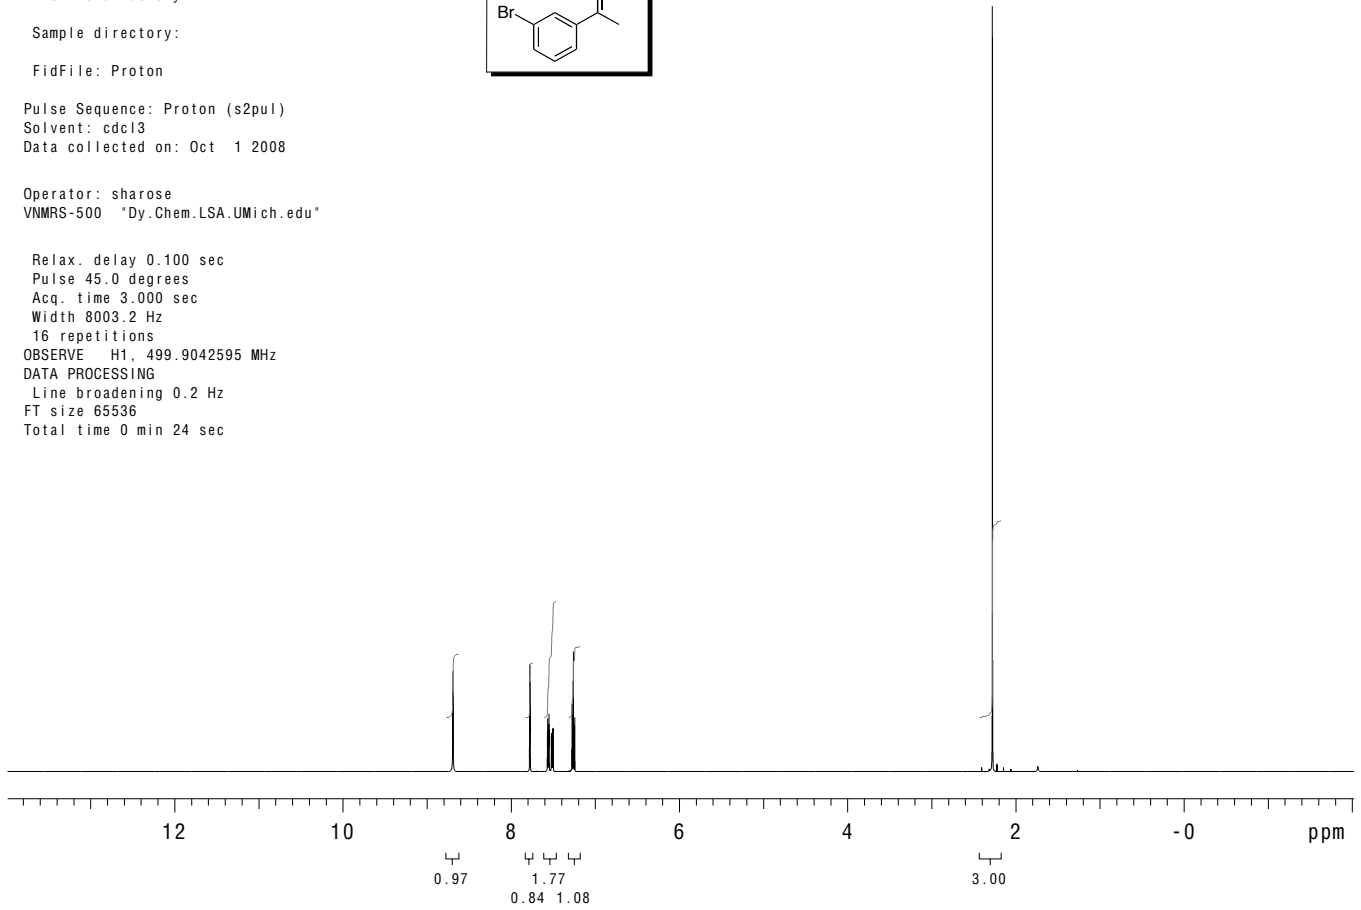

Data Collected on:

Co.Chem.LSA.UMich.edu-vnmrs400

Archive directory:

Sample directory:

FidFile: CARBON

Pulse Sequence: CARBON (s2pul)

Solvent: cdcl3

Data collected on: Oct 10 2009

Operator: sharose

Relax. delay 0.100 sec

Pulse 45.0 degrees

Acq. time 2.569 sec

Width 25510.2 Hz

80 repetitions

OBSERVE C13, 100.7109800 MHz

DECOUPLE H1, 400.5225704 MHz

Power 41 dB

continuously on

WALTZ-16 modulated

DATA PROCESSING

Line broadening 1.0 Hz

FT size 131072

Total time 1 hr, 29 min

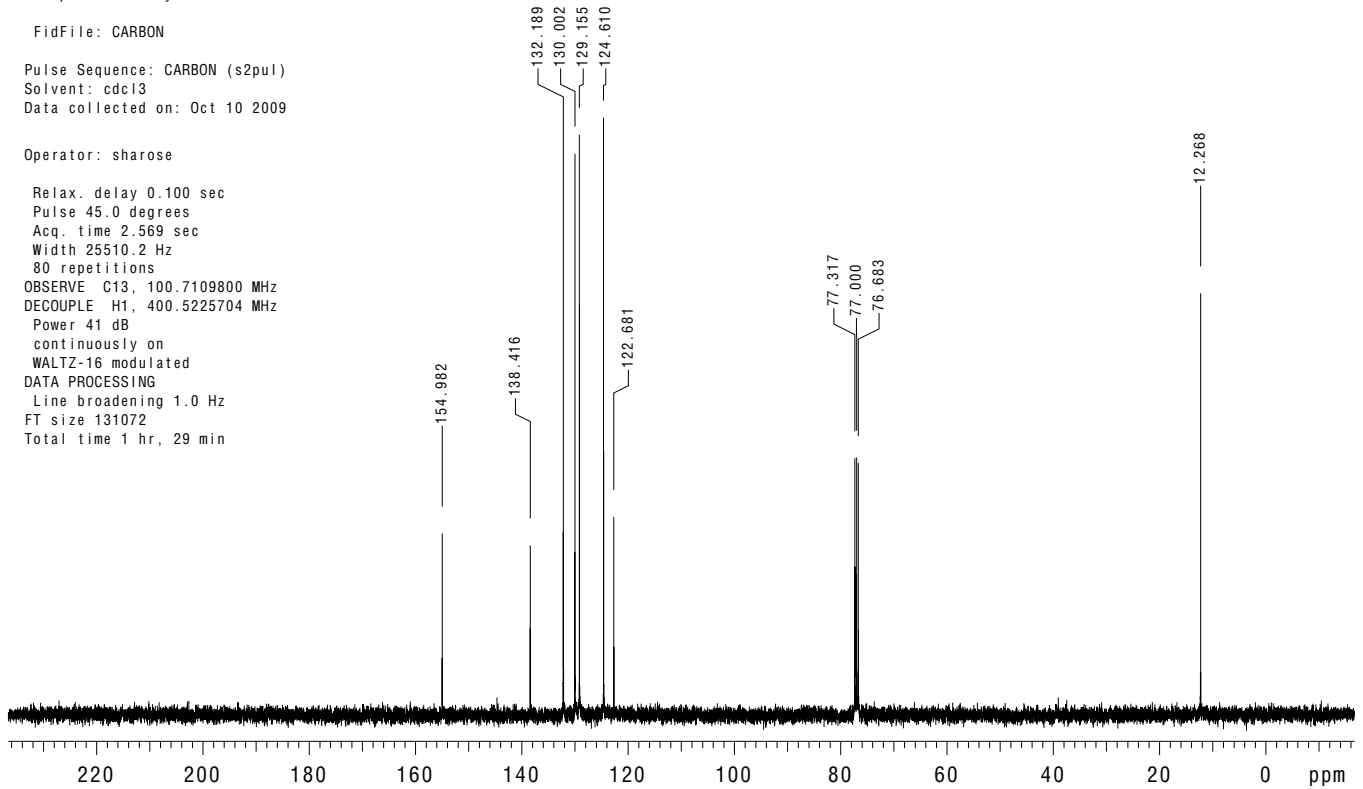

Sample directory:

FidFile: Proton

Pulse Sequence: Proton (s2pul)  
Solvent: cdcl3  
Data collected on: Sep 3 2008

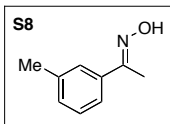

Operator: sharose  
VNMR-400 "Md. Chem. LSA. UMich. edu"

Relax. delay 0.100 sec  
Pulse 45.0 degrees  
Acq. time 3.000 sec  
Width 8003.2 Hz  
16 repetitions  
OBSERVE H1, 499.9042619 MHz  
DATA PROCESSING  
Line broadening 0.2 Hz  
FT size 65536  
Total time 0 min 24 sec

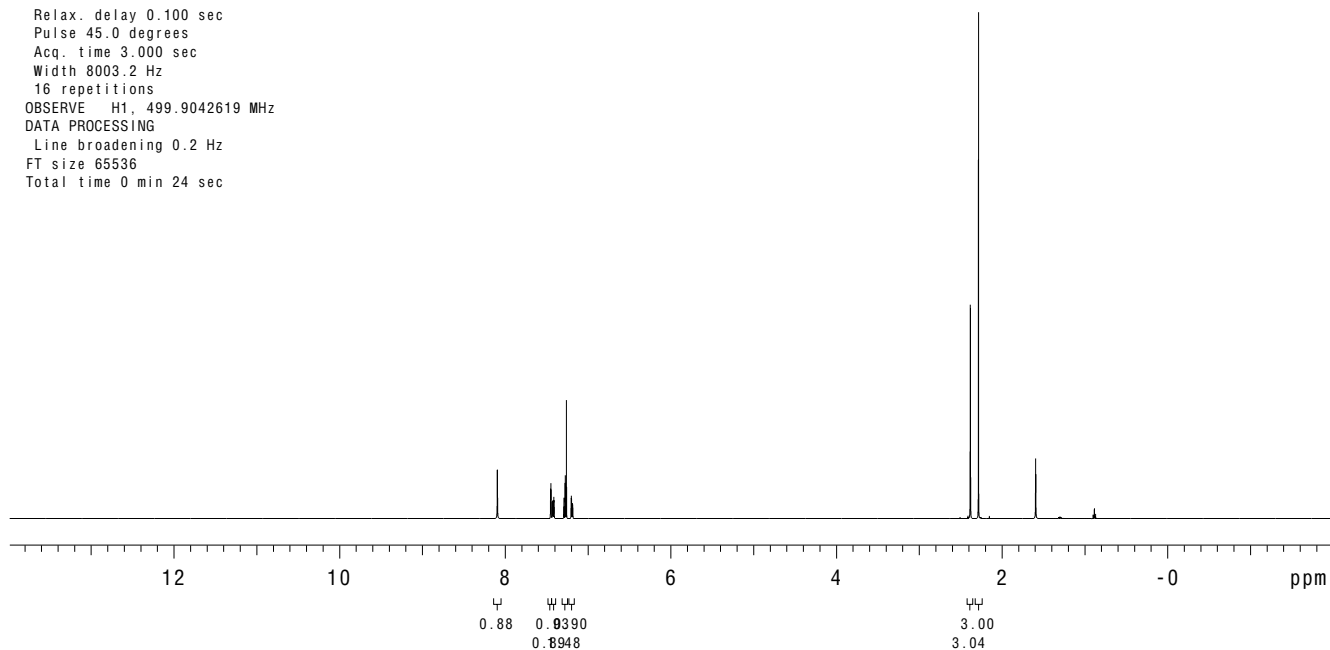

Data Collected on:  
Co. Chem. LSA. UMich. edu-vmrs400  
Archive directory:

Sample directory:

FidFile: CARBON

Pulse Sequence: CARBON (s2pul)  
Solvent: cdcl3  
Data collected on: Oct 10 2009

Operator: sharose

Relax. delay 0.100 sec  
Pulse 45.0 degrees  
Acq. time 2.569 sec  
Width 25510.2 Hz  
64 repetitions  
OBSERVE C13, 100.7109812 MHz  
DECOUPLE H1, 400.5225704 MHz  
Power 41 dB  
continuously on  
WALTZ-16 modulated  
DATA PROCESSING  
Line broadening 1.0 Hz  
FT size 131072  
Total time 1 hr, 29 min

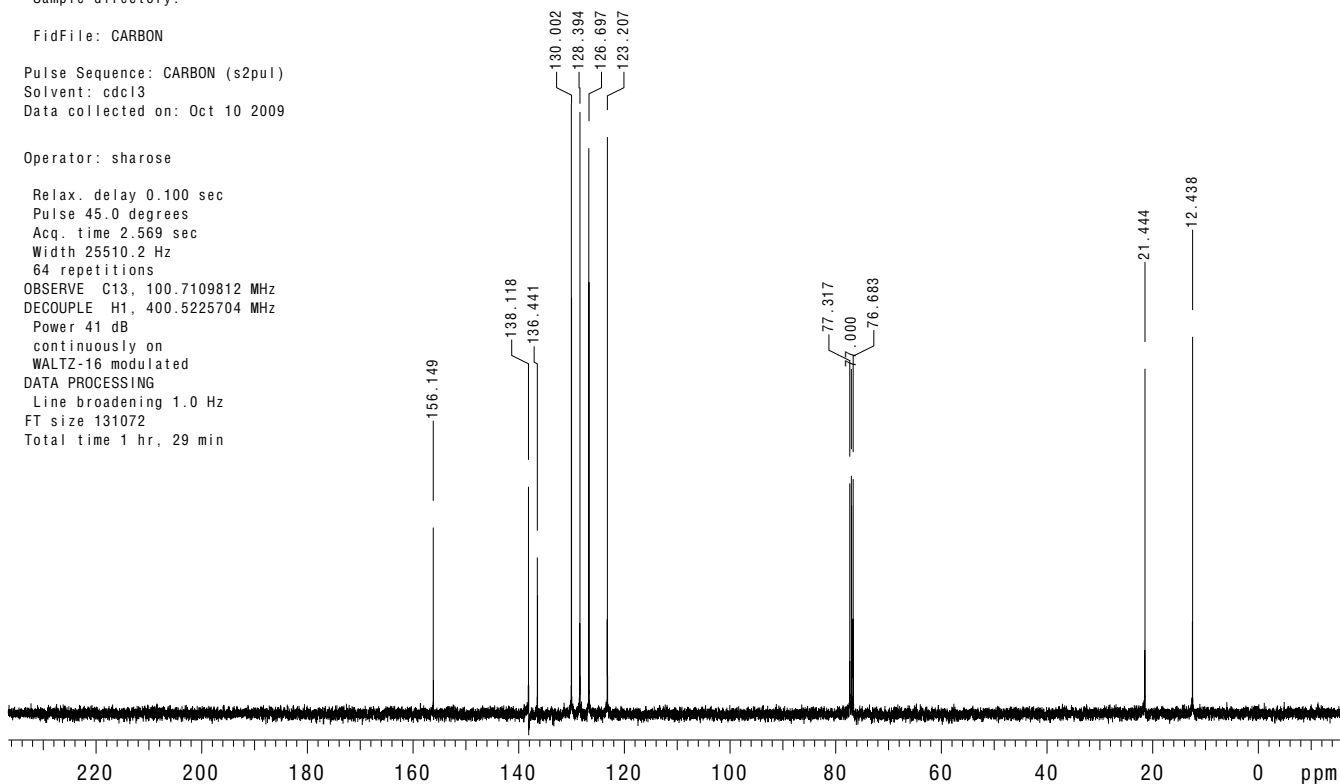

Archive directory:

Sample directory:

FidFile: Proton

Pulse Sequence: Proton (s2pul)

Solvent: cdcl3

Data collected on: Oct 1 2008

Operator: sharose

VNMRS-400 "Md.Chem.LSA.UMich.edu"

Relax. delay 0.100 sec  
Pulse 45.0 degrees  
Acq. time 3.000 sec  
Width 8003.2 Hz  
16 repetitions  
OBSERVE H1, 499.9042609 MHz  
DATA PROCESSING  
Line broadening 0.2 Hz  
FT size 65536  
Total time 0 min 24 sec

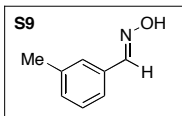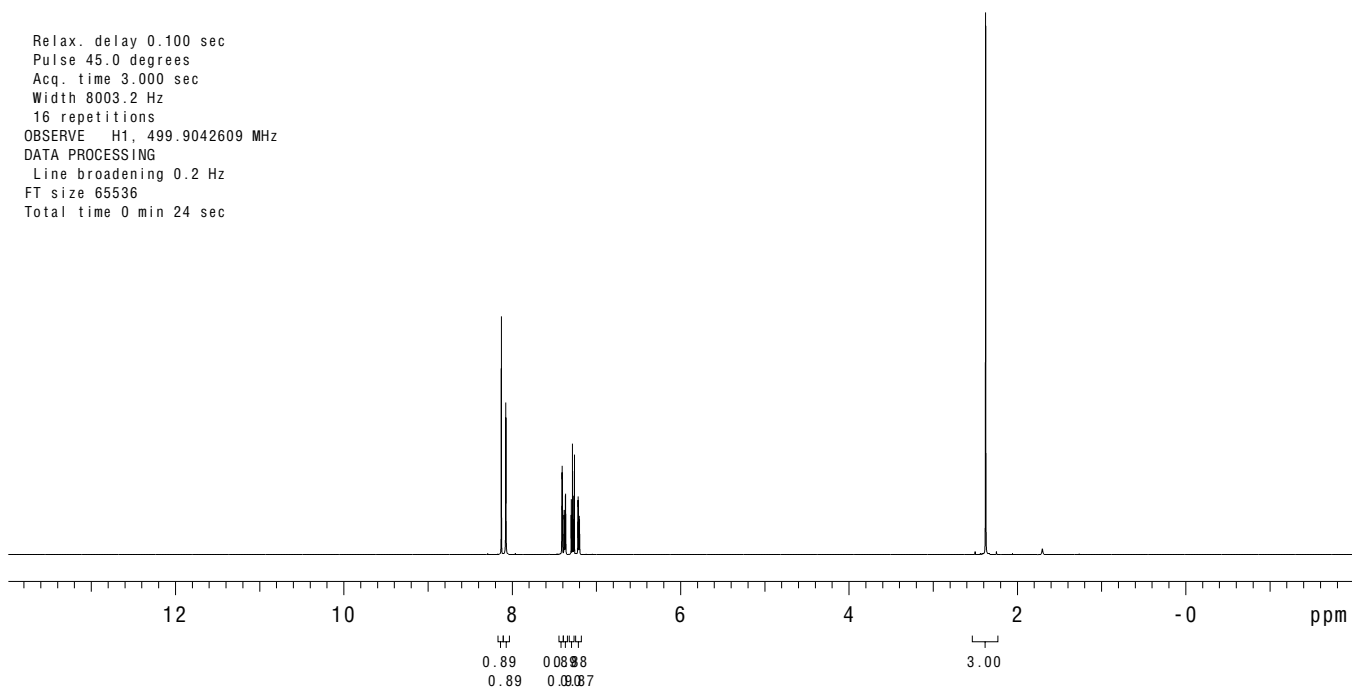

Data Collected on:  
Co.Chem.LSA.UMich.edu-vnmrs400  
Archive directory:

Sample directory:

FidFile: CARBON

Pulse Sequence: CARBON (s2pul)

Solvent: cdcl3

Data collected on: Oct 10 2009

Operator: sharose

Relax. delay 0.100 sec  
Pulse 45.0 degrees  
Acq. time 2.569 sec  
Width 25510.2 Hz  
48 repetitions  
OBSERVE C13, 100.7109804 MHz  
DECOUPLE H1, 400.5225704 MHz  
Power 41 dB  
continuously on  
WALTZ-16 modulated  
DATA PROCESSING  
Line broadening 1.0 Hz  
FT size 131072  
Total time 44 min

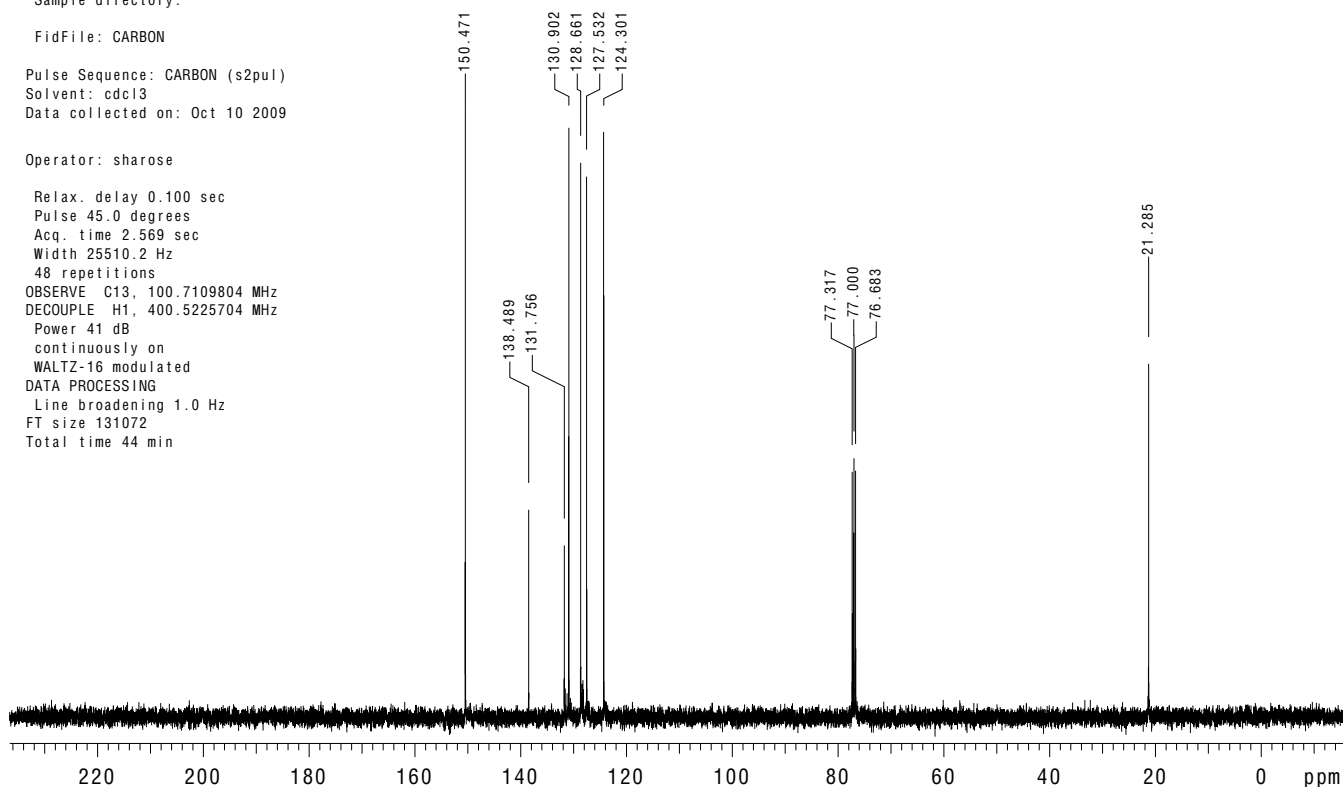

Data Collected on:  
Sn.Chem.LSA.UMich.edu-inova500  
Archive directory:

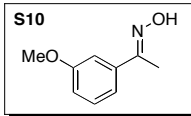

Sample directory:

FidFile: 4SRN25\_1H\_DMSO

Pulse Sequence: PROTON (s2pul)  
Solvent: dms0  
Data collected on: Nov 23 2009

Operator: sharose

Relax. delay 0.500 sec  
Pulse 45.0 degrees  
Acq. time 3.500 sec  
Width 7998.4 Hz  
16 repetitions  
OBSERVE H1, 499.9066271 MHz  
DATA PROCESSING  
Line broadening 0.3 Hz  
FT size 65536  
Total time 1 min 12 sec

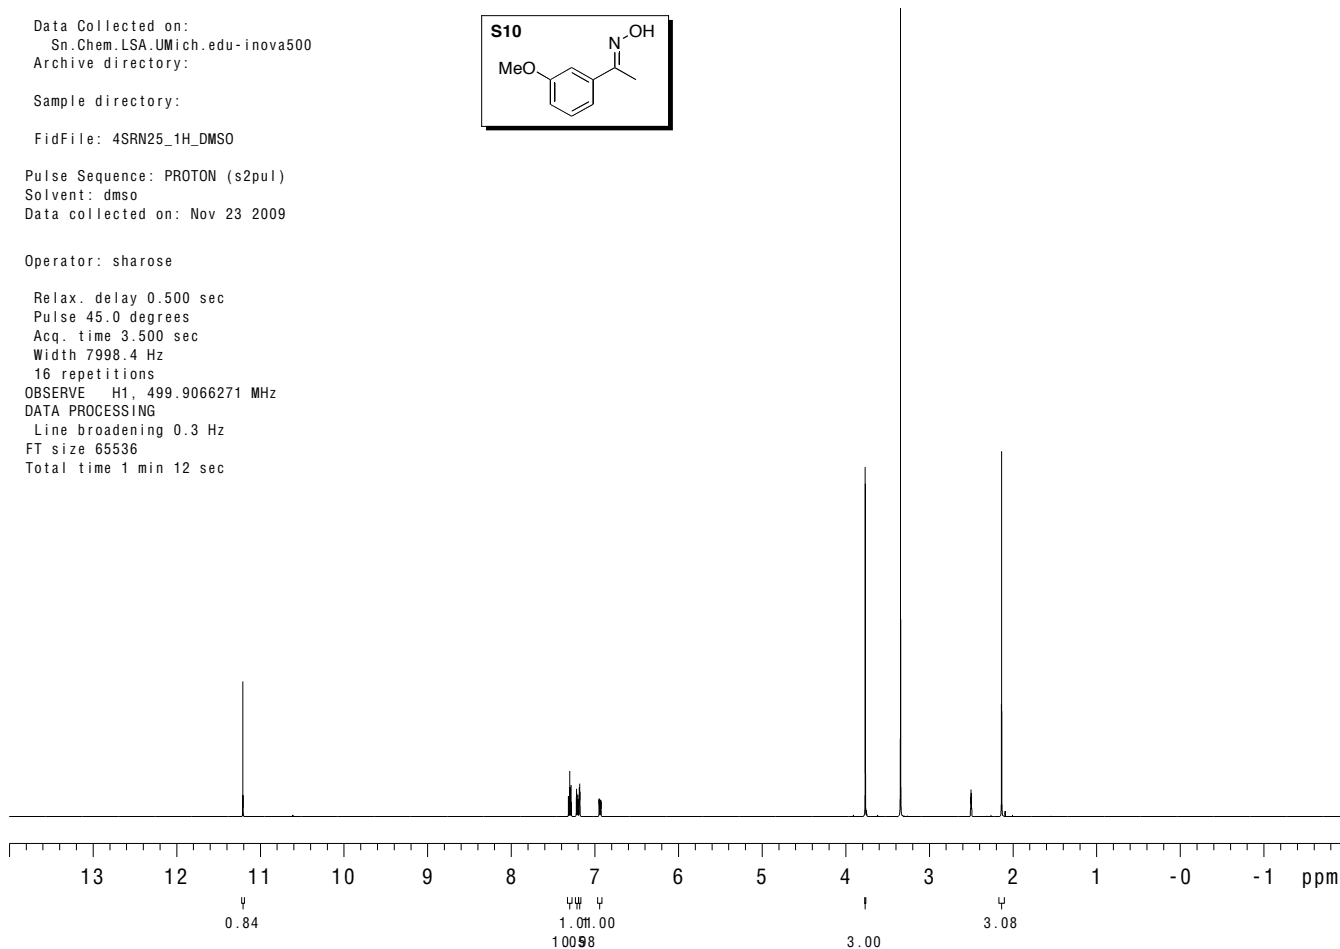

Data Collected on:  
Co.Chem.LSA.UMich.edu-vnmrs400  
Archive directory:

Sample directory:

FidFile: CARBON

Pulse Sequence: CARBON (s2pul)  
Solvent: cdcl3  
Data collected on: Oct 10 2009

Operator: sharose

Relax. delay 0.100 sec  
Pulse 45.0 degrees  
Acq. time 2.569 sec  
Width 25510.2 Hz  
192 repetitions  
OBSERVE C13, 100.7109773 MHz  
DECOUPLE H1, 400.5225704 MHz  
Power 41 dB  
continuously on  
WALTZ-16 modulated  
DATA PROCESSING  
Line broadening 1.0 Hz  
FT size 131072  
Total time 1 hr, 29 min

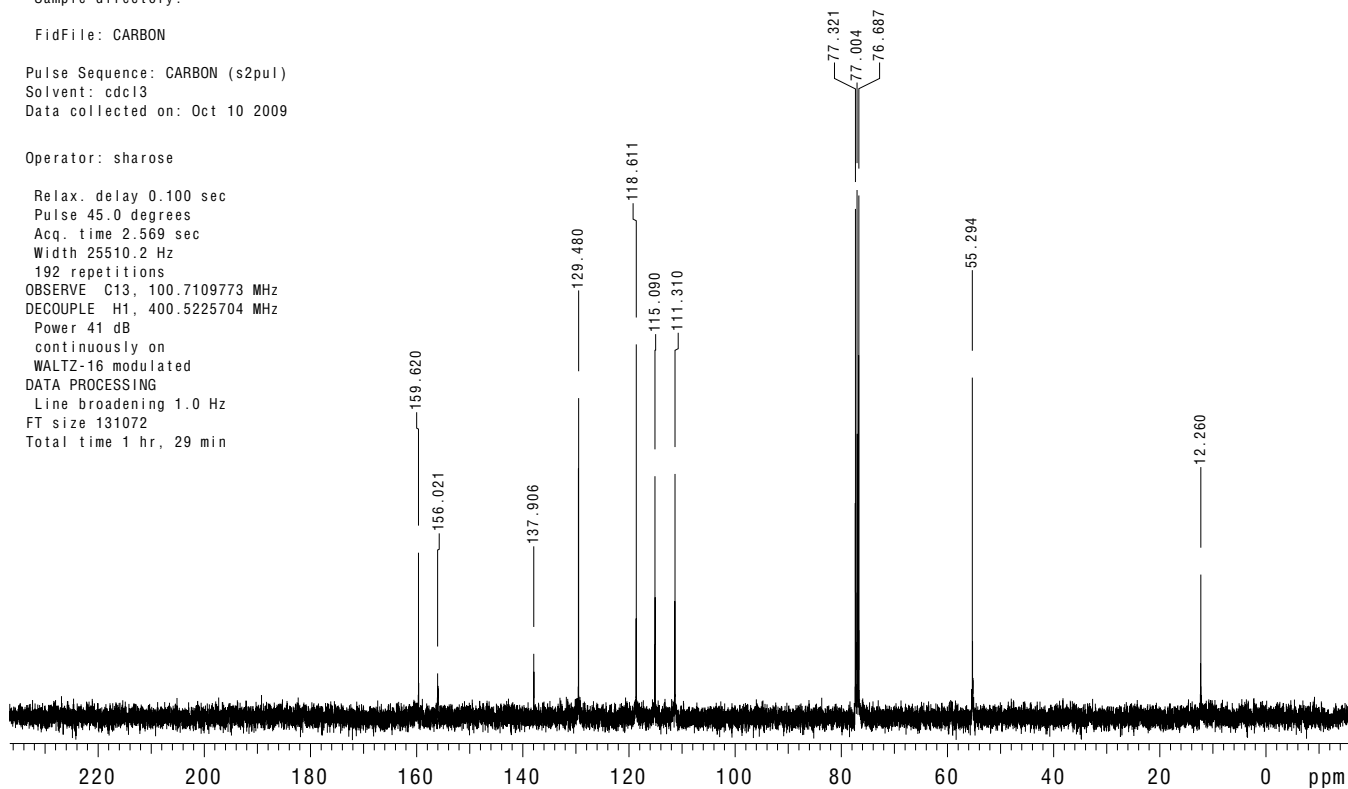

Data Collected on:  
Co.Chem.LSA.UMich.edu-vnmrs400  
Archive directory:

Sample directory:

FidFile: PROTON

Pulse Sequence: PROTON (s2pul)  
Solvent: cdcl3  
Data collected on: Aug 19 2009

Temp. 25.0 C / 298.1 K  
Operator: sharose

Relax. delay 0.500 sec  
Pulse 45.0 degrees  
Acq. time 3.500 sec  
Width 6410.3 Hz  
16 repetitions  
OBSERVE H1, 400.5205667 MHz  
DATA PROCESSING  
Line broadening 0.3 Hz  
FT size 65536  
Total time 1 min 12 sec

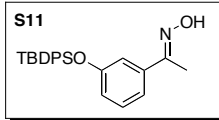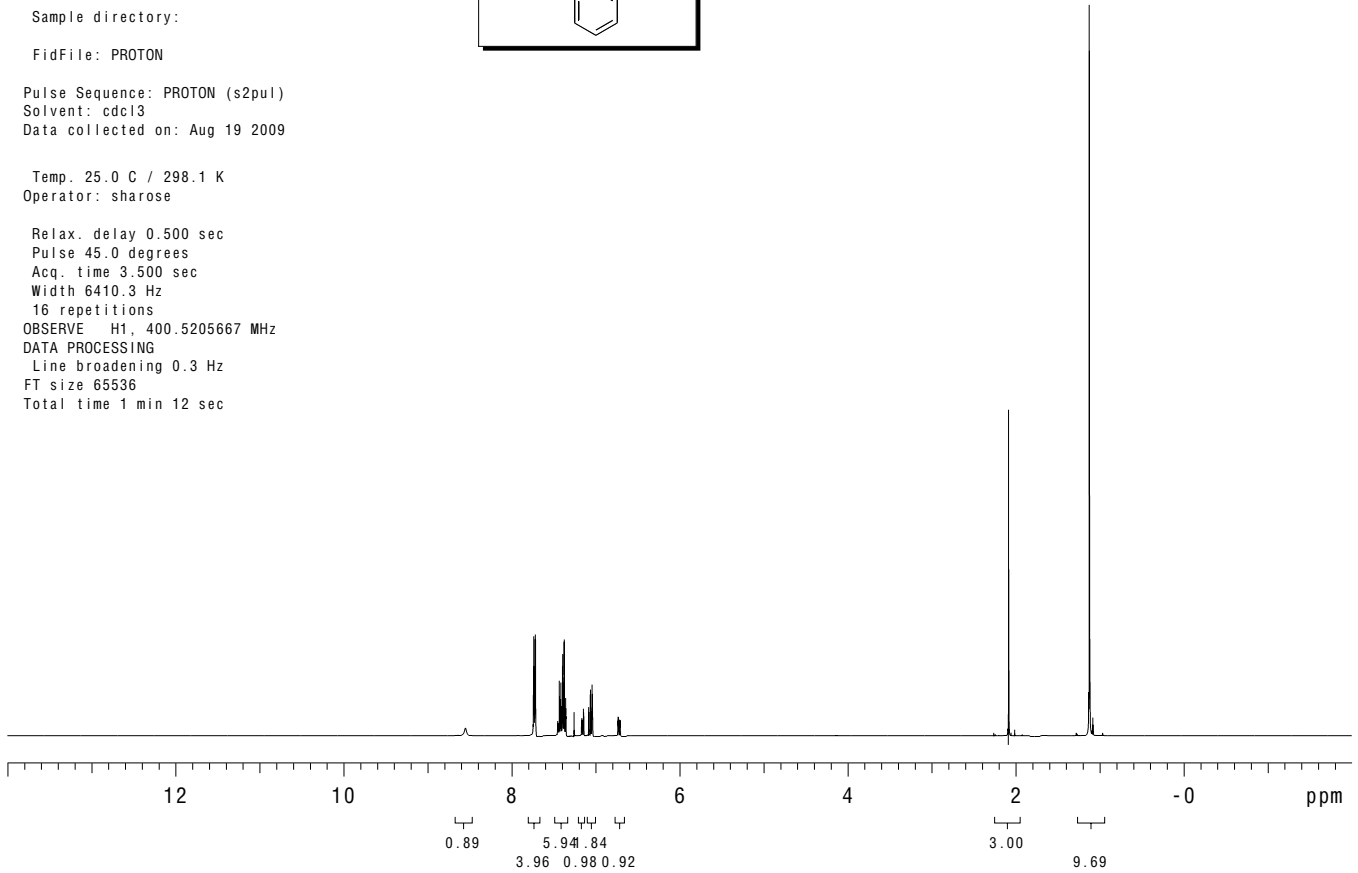

Data Collected on:  
Co.Chem.LSA.UMich.edu-vnmrs400  
Archive directory:

Sample directory:

FidFile: CARBON

Pulse Sequence: CARBON (s2pul)  
Solvent: cdcl3  
Data collected on: Aug 19 2009

Temp. 25.0 C / 298.1 K  
Operator: sharose

Relax. delay 0.100 sec  
Pulse 45.0 degrees  
Acq. time 2.569 sec  
Width 25510.2 Hz  
80 repetitions  
OBSERVE C13, 100.7109785 MHz  
DECOUPLE H1, 400.5225704 MHz  
Power 41 dB  
continuously on  
WALTZ-16 modulated  
DATA PROCESSING  
Line broadening 1.0 Hz  
FT size 131072  
Total time 44 min

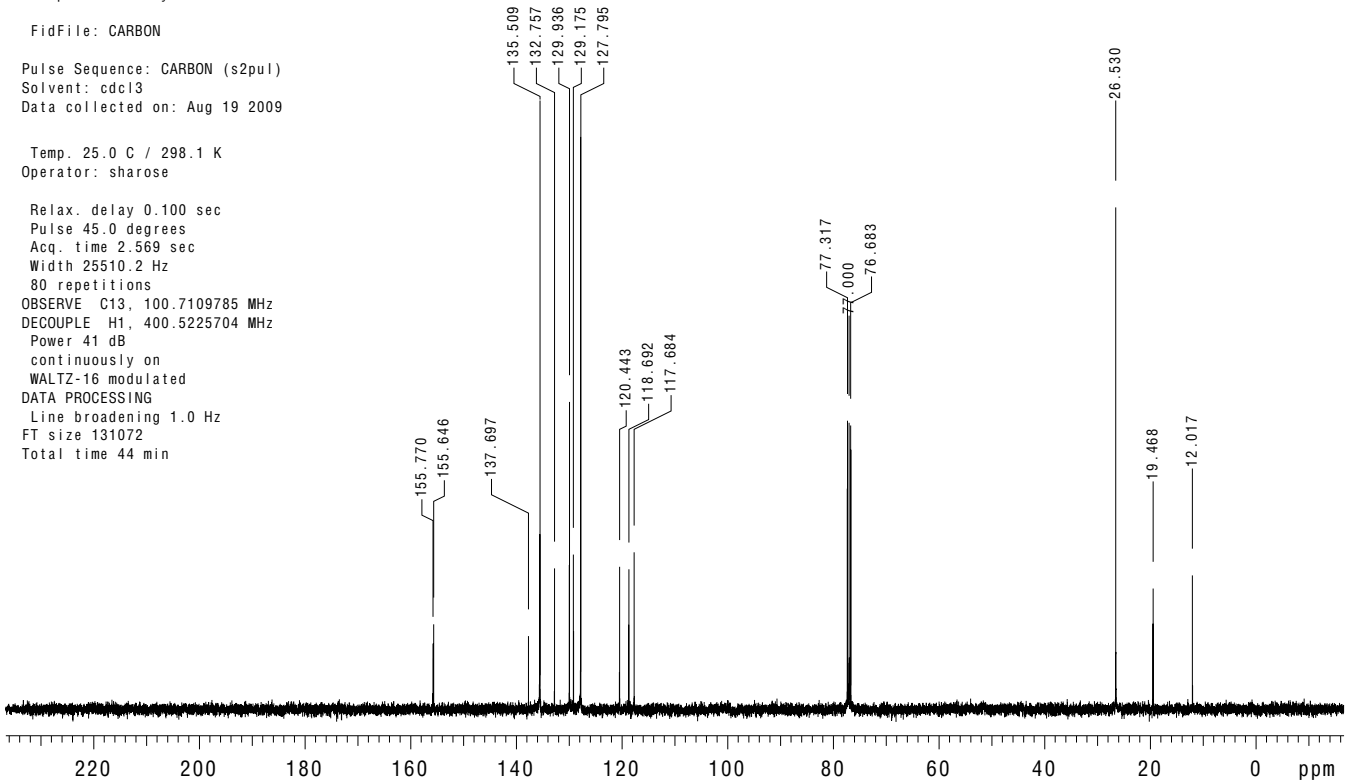

Data Collected on:  
Zr.Chem.LSA.UMich.edu-inova400  
Archive directory:

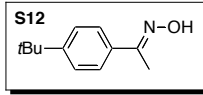

Sample directory:

FidFile: PROTON

Pulse Sequence: PROTON (s2pul)  
Solvent: cdcl3  
Data collected on: Nov 10 2009

Temp. 23.0 C / 296.1 K  
Operator: sharose

Relax. delay 0.500 sec  
Pulse 45.0 degrees  
Acq. time 3.500 sec  
Width 6399.5 Hz  
16 repetitions  
OBSERVE H1, 399.9649492 MHz  
DATA PROCESSING  
Line broadening 0.3 Hz  
FT size 65536  
Total time 1 min 12 sec

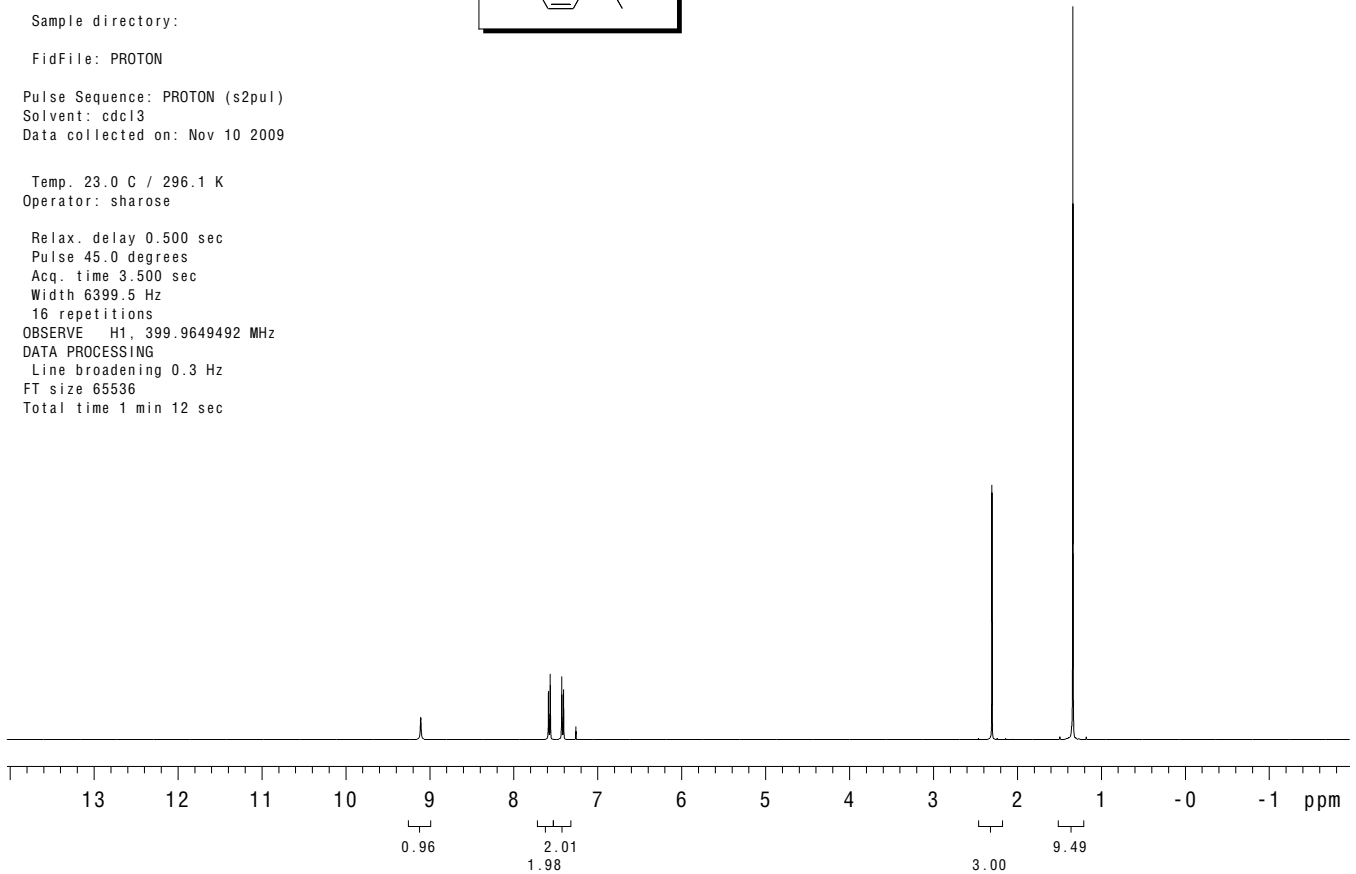

Data Collected on:  
Zr.Chem.LSA.UMich.edu-inova400  
Archive directory:

Sample directory:

FidFile: CARBON

Pulse Sequence: CARBON (s2pul)  
Solvent: cdcl3  
Data collected on: Nov 10 2009

Temp. 23.0 C / 296.1 K  
Operator: sharose

Relax. delay 0.100 sec  
Pulse 45.0 degrees  
Acq. time 2.607 sec  
Width 25141.4 Hz  
64 repetitions  
OBSERVE C13, 100.5712678 MHz  
DECOUPLE H1, 399.9669644 MHz  
Power 39 dB  
continuously on  
WALTZ-16 modulated  
DATA PROCESSING  
Line broadening 1.0 Hz  
FT size 131072  
Total time 11 min

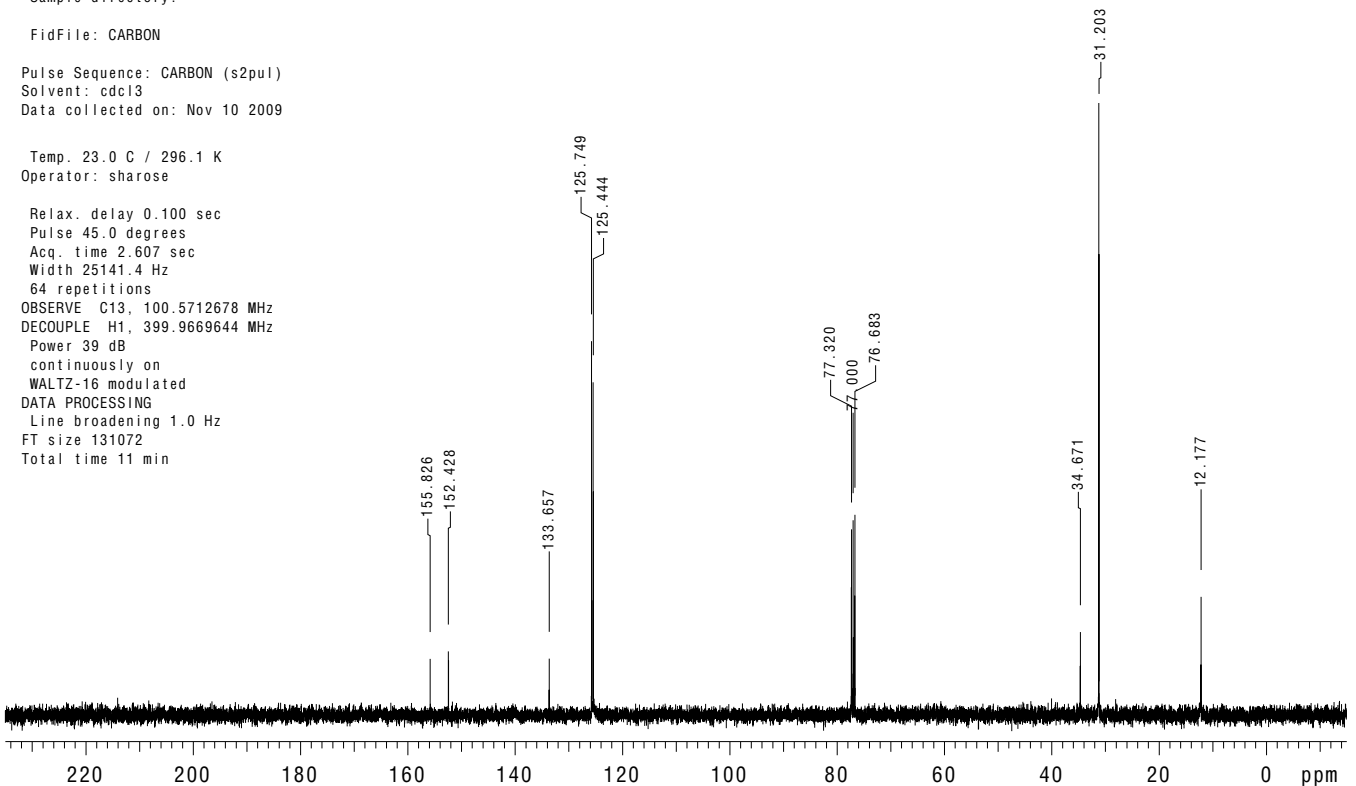



Data Collected on:  
Co.Chem.LSA.UMich.Edu-vnmrs400  
Archive directory:

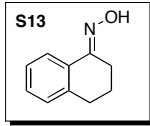

Sample directory:

FidFile: PROTON

Pulse Sequence: PROTON (s2pul)  
Solvent: cdcl3  
Data collected on: Jan 31 2009

Operator: sharose

Relax. delay 1.000 sec  
Pulse 45.0 degrees  
Acq. time 2.556 sec  
Width 6410.3 Hz  
8 repetitions  
OBSERVE H1, 400.5297586 MHz  
DATA PROCESSING  
FT size 32768  
Total time 0 min 36 sec

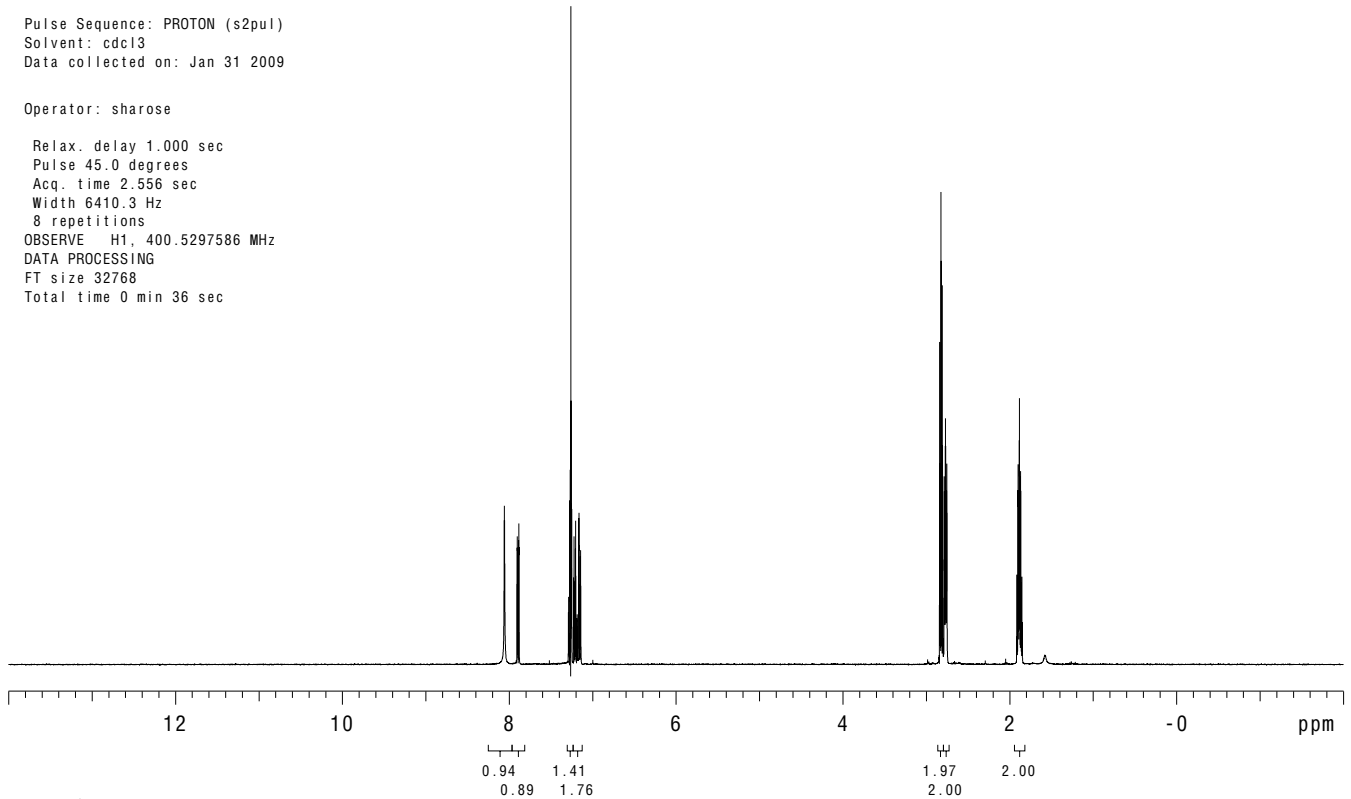

Data Collected on:  
Co.Chem.LSA.UMich.edu-vnmrs400  
Archive directory:

Sample directory:

FidFile: CARBON

Pulse Sequence: CARBON (s2pul)  
Solvent: cdcl3  
Data collected on: Oct 10 2009

Operator: sharose

Relax. delay 0.100 sec  
Pulse 45.0 degrees  
Acq. time 2.569 sec  
Width 25510.2 Hz  
64 repetitions  
OBSERVE C13, 100.7109796 MHz  
DECOUPLE H1, 400.5225704 MHz  
Power 41 dB  
continuously on  
WALTZ-16 modulated  
DATA PROCESSING  
Line broadening 1.0 Hz  
FT size 131072  
Total time 44 min

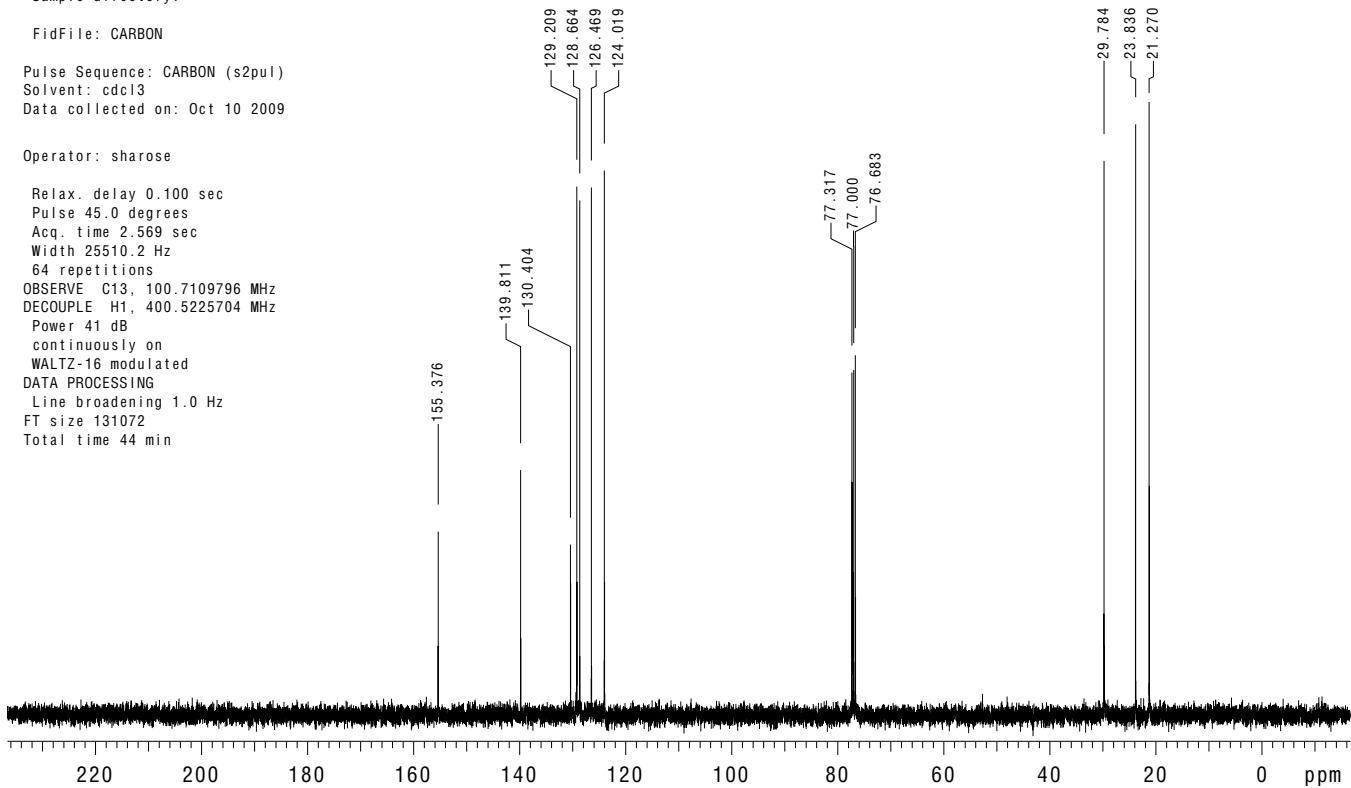

Data Collected on:  
Sn.Chem.LSA.UMich.edu-inova500  
Archive directory:

Sample directory:

FidFile: PROTON

Pulse Sequence: PROTON (s2pul)  
Solvent: cdcl3  
Data collected on: Jun 22 2009

Operator: sharose

Relax. delay 0.500 sec  
Pulse 45.0 degrees  
Acq. time 3.500 sec  
Width 7998.4 Hz  
16 repetitions  
OBSERVE H1, 499.9042606 MHz  
DATA PROCESSING  
Line broadening 0.3 Hz  
FT size 65536  
Total time 1 min 12 sec

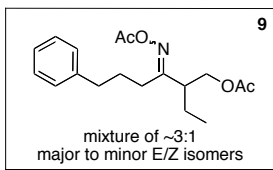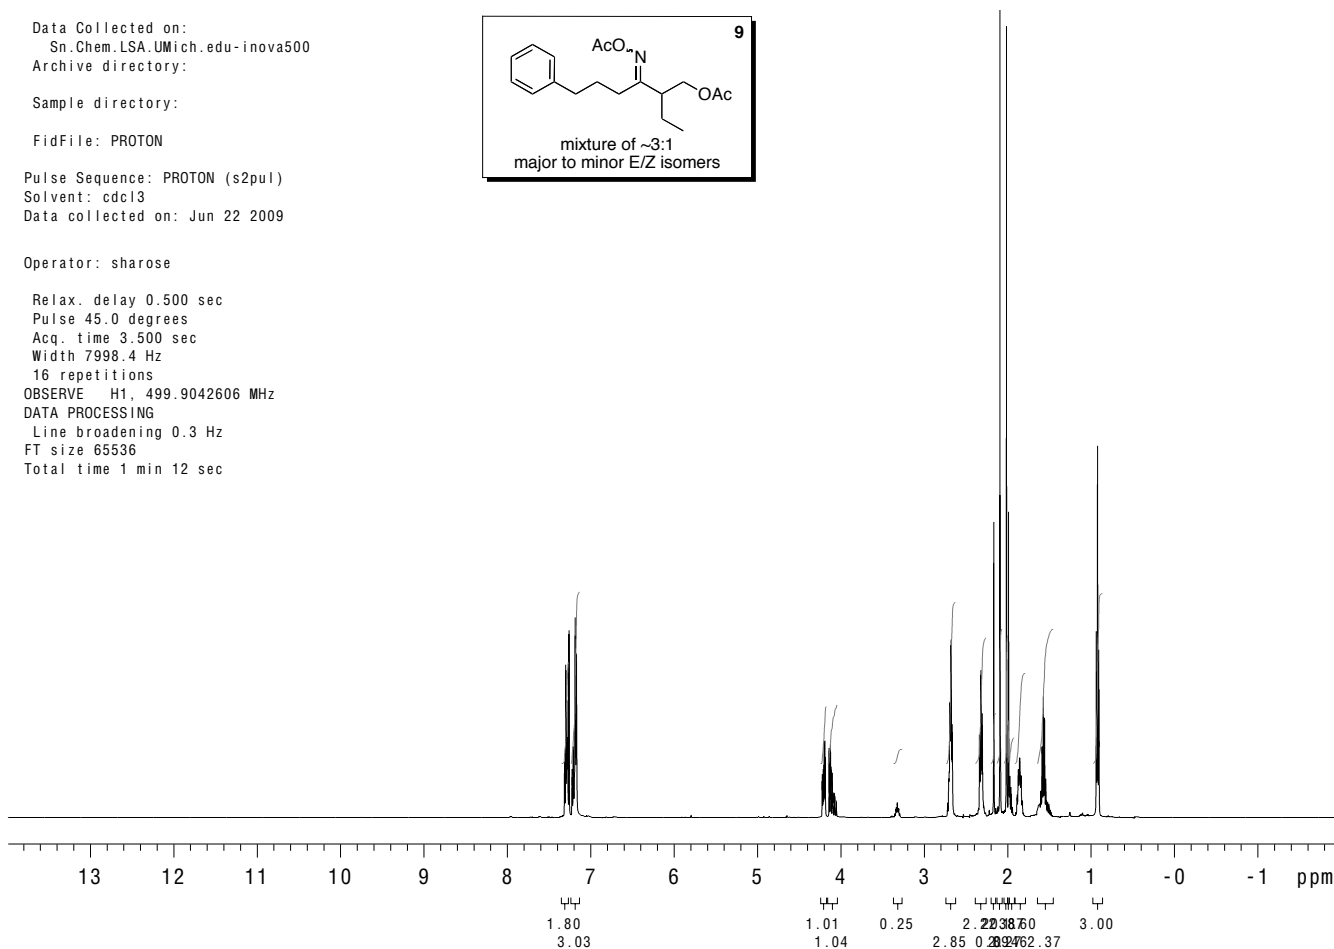

Archive directory:

Sample directory:

FidFile: Carbon

Pulse Sequence: Carbon (s2pul)  
Solvent: cdcl3  
Data collected on: Jul 2 2008

Operator: sharose  
VNMR5-500 "Dy.Chem.LSA.UMich.edu"

Relax. delay 0.100 sec  
Pulse 30.0 degrees  
Acq. time 1.300 sec  
Width 24140.0 Hz  
176 repetitions  
OBSERVE C13, 100.5712736 MHz  
DECOUPLE H1, 399.9669644 MHz  
Power 39 dB  
continuously on  
WALTZ-16 modulated  
DATA PROCESSING  
Line broadening 0.8 Hz  
FT size 65536  
Total time 0 min 24 sec

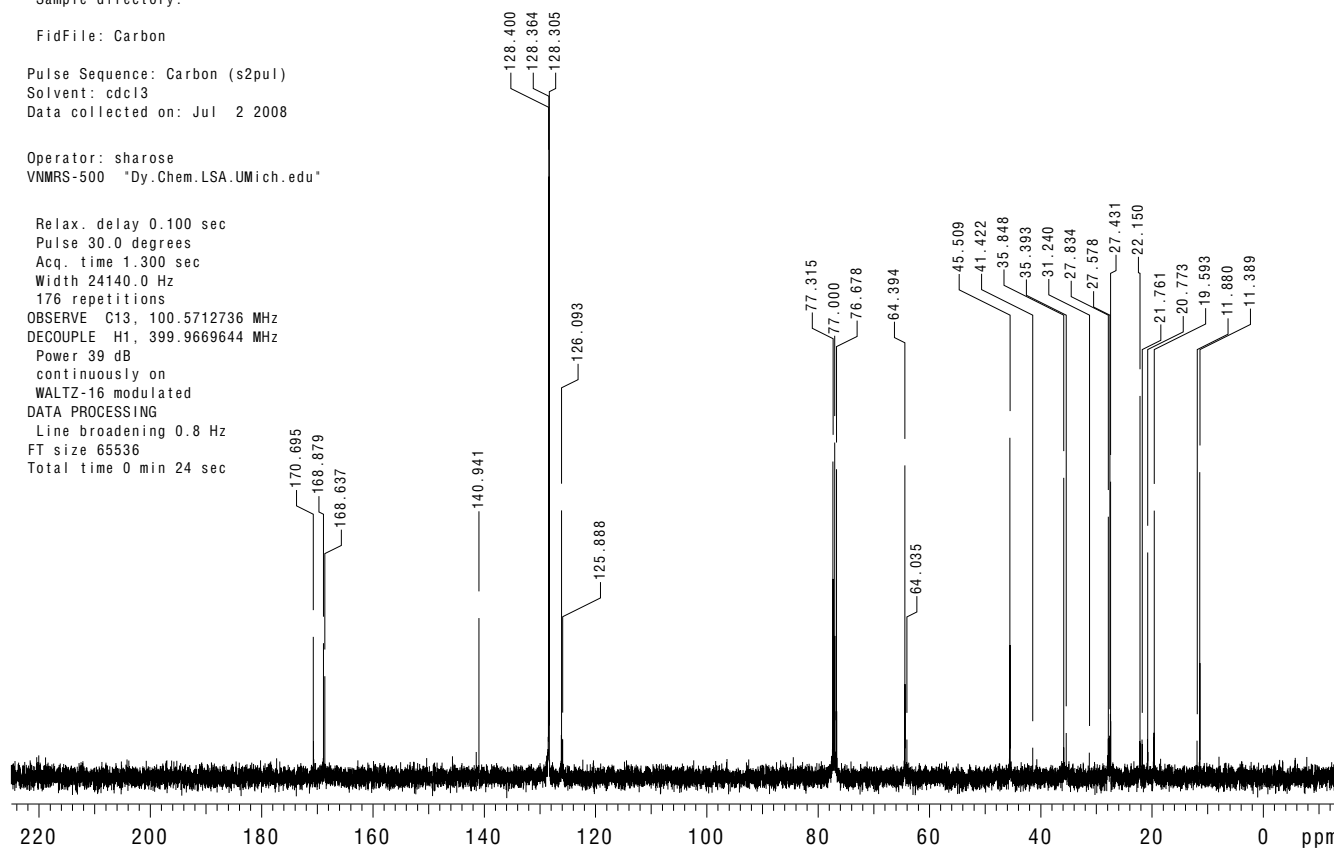

Data Collected on:  
 Zr.Chem.LSA.UMich.edu-inova400  
 Archive directory:  
 /export/home/chempack/vnmrsys/data  
 Sample directory:

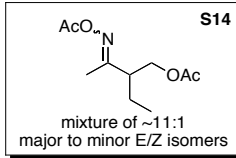

FidFile: PROTON  
 Pulse Sequence: PROTON (s2pul)  
 Solvent: cdcl3  
 Data collected on: Nov 11 2009

Temp. 25.0 C / 298.1 K  
 Operator: sharose

Relax. delay 0.500 sec  
 Pulse 45.0 degrees  
 Acq. time 3.500 sec  
 Width 6399.5 Hz  
 16 repetitions  
 OBSERVE H1, 399.9649490 MHz  
 DATA PROCESSING  
 Line broadening 0.3 Hz  
 FT size 65536  
 Total time 1 min 12 sec

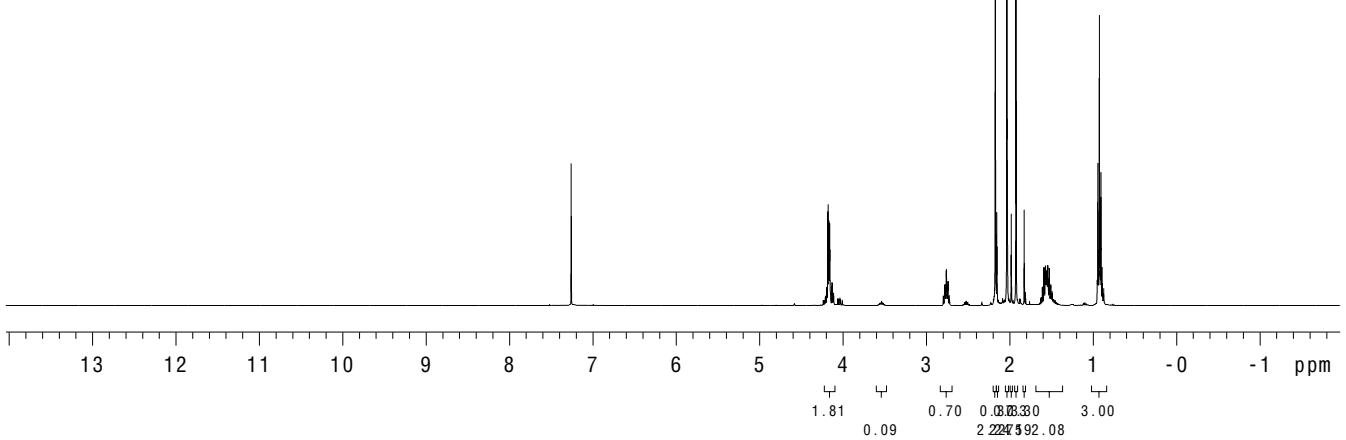

Data Collected on:  
 Co.Chem.LSA.UMich.Edu-vnmrs400  
 Archive directory:

Sample directory:  
 FidFile: CARBON

Pulse Sequence: CARBON (s2pul)  
 Solvent: CDCl3  
 Data collected on: Jun 5 2008

Operator: sharose

Relax. delay 1.000 sec  
 Pulse 45.0 degrees  
 Acq. time 1.285 sec  
 Width 25510.2 Hz  
 400 repetitions  
 OBSERVE C13, 100.7132888 MHz  
 DECOUPLE H1, 400.5317616 MHz  
 Power 45 dB  
 continuously on  
 WALTZ-16 modulated  
 DATA PROCESSING  
 Line broadening 0.5 Hz  
 FT size 65536  
 Total time 1 hr, 16 min

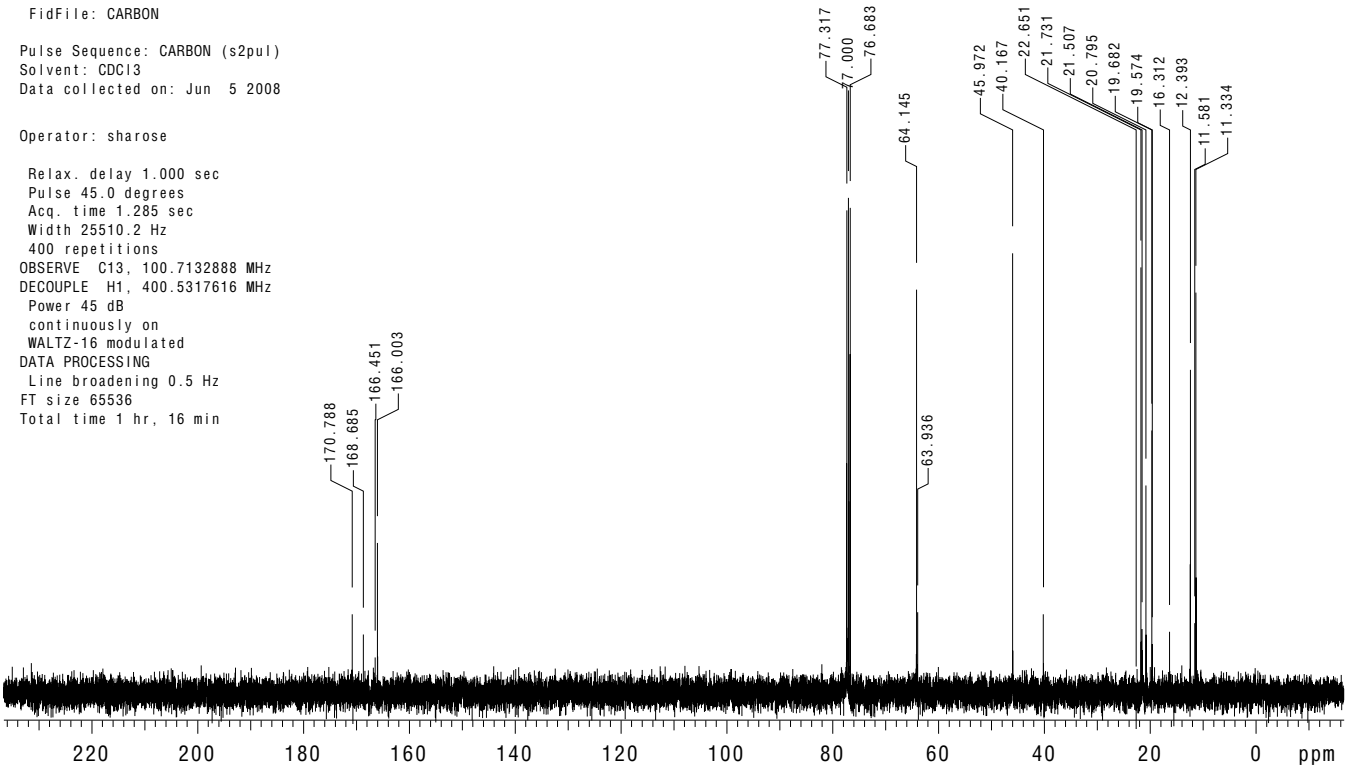

Data Collected on:  
Zr.Chem.LSA.UMich.edu-inova400  
Archive directory:  
/export/home/chempack/vnmrsys/data  
Sample directory:

FidFile: PROTON

Pulse Sequence: PROTON (s2pul)  
Solvent: cdcl3  
Data collected on: Nov 11 2009

Temp. 25.0 C / 298.1 K  
Operator: sharose

Relax. delay 0.500 sec  
Pulse 45.0 degrees  
Acq. time 3.500 sec  
Width 6399.5 Hz  
16 repetitions  
OBSERVE H1, 399.9649484 MHz  
DATA PROCESSING  
Line broadening 0.3 Hz  
FT size 65536  
Total time 1 min 12 sec

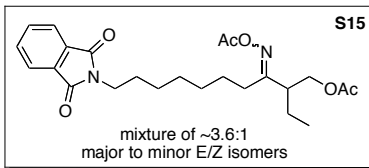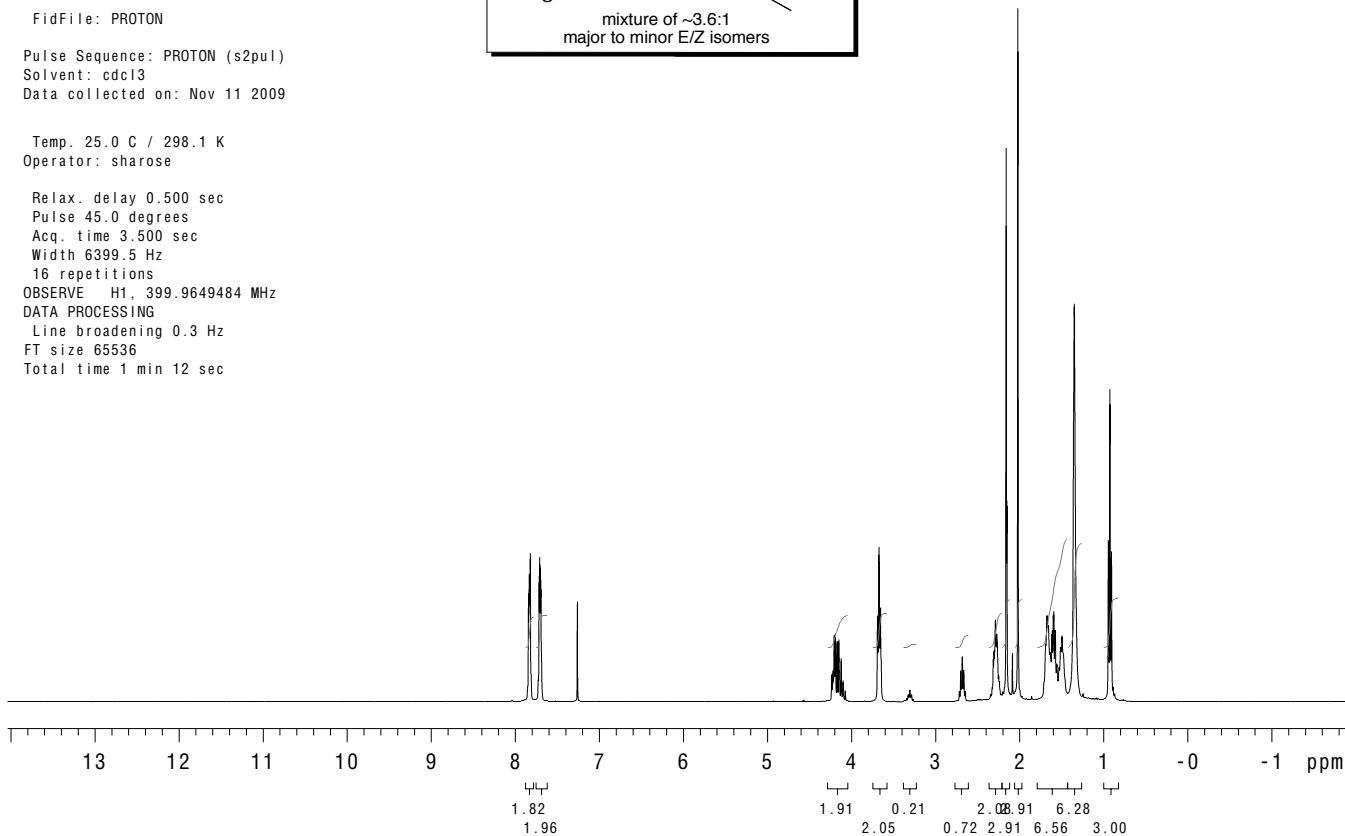

Data Collected on:  
Zr.Chem.LSA.UMich.edu-inova400  
Archive directory:

Sample directory:

FidFile: CARBON

Pulse Sequence: CARBON (s2pul)  
Solvent: cdcl3  
Data collected on: Aug 6 2009

Operator: sharose

Relax. delay 0.100 sec  
Pulse 45.0 degrees  
Acq. time 2.607 sec  
Width 25141.4 Hz  
80 repetitions  
OBSERVE C13, 100.5712770 MHz  
DECOUPLE H1, 399.9669644 MHz  
Power 39 dB  
continuously on  
WALTZ-16 modulated  
DATA PROCESSING  
Line broadening 1.0 Hz  
FT size 131072  
Total time 11 min

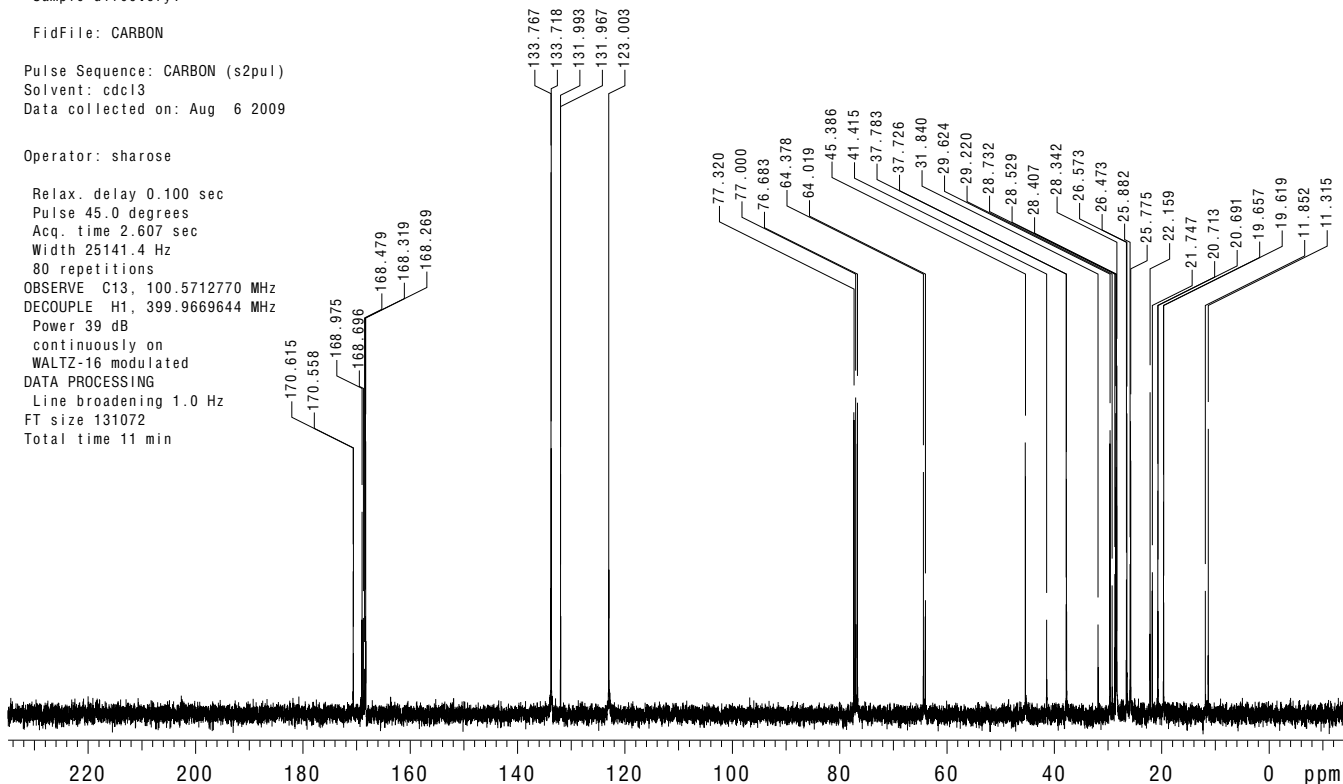

Zr.Chem.LSA.UMich.edu-inova400  
Archive directory:  
/export/home/chempack/vnmrsys/data  
Sample directory:

FidFile: PROTON

Pulse Sequence: PROTON (s2pul)  
Solvent: cdcl3  
Data collected on: Nov 11 2009

Temp. 25.0 C / 298.1 K  
Operator: sharose

Relax. delay 0.500 sec  
Pulse 45.0 degrees  
Acq. time 3.500 sec  
Width 6399.5 Hz  
16 repetitions  
OBSERVE H1, 399.9649488 MHz  
DATA PROCESSING  
Line broadening 0.3 Hz  
FT size 65536  
Total time 1 min 12 sec

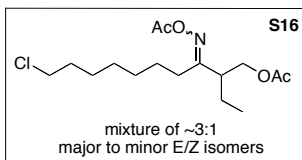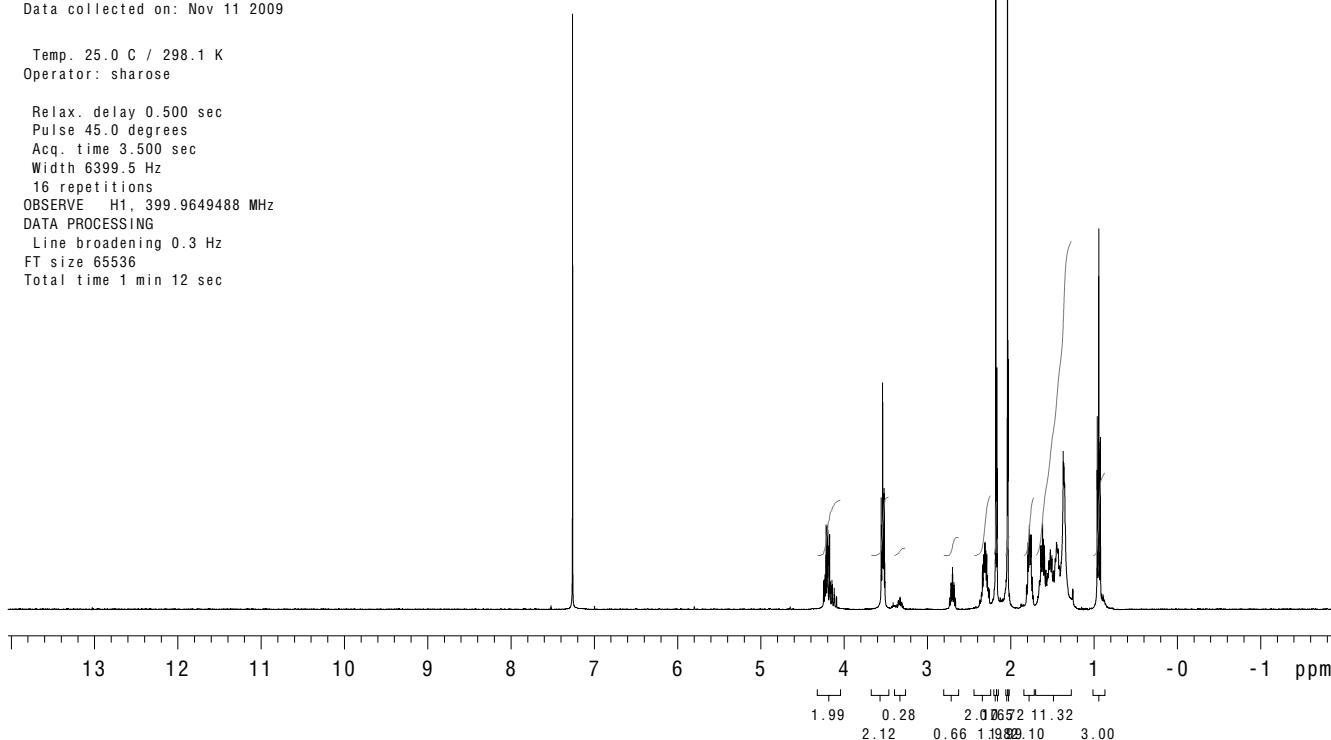

Data Collected on:  
Co.Chem.LSA.UMich.edu-vnmrs400  
Archive directory:

Sample directory:

FidFile: CARBON

Pulse Sequence: CARBON (s2pul)  
Solvent: cdcl3  
Data collected on: Sep 16 2009

Temp. 25.0 C / 298.1 K  
Operator: sharose

Relax. delay 0.100 sec  
Pulse 45.0 degrees  
Acq. time 2.569 sec  
Width 25510.2 Hz  
256 repetitions  
OBSERVE C13, 100.7109773 MHz  
DECOUPLE H1, 400.5225704 MHz  
Power 41 dB  
continuously on  
WALTZ-16 modulated  
DATA PROCESSING  
Line broadening 1.0 Hz  
FT size 131072  
Total time 1 hr, 29 min

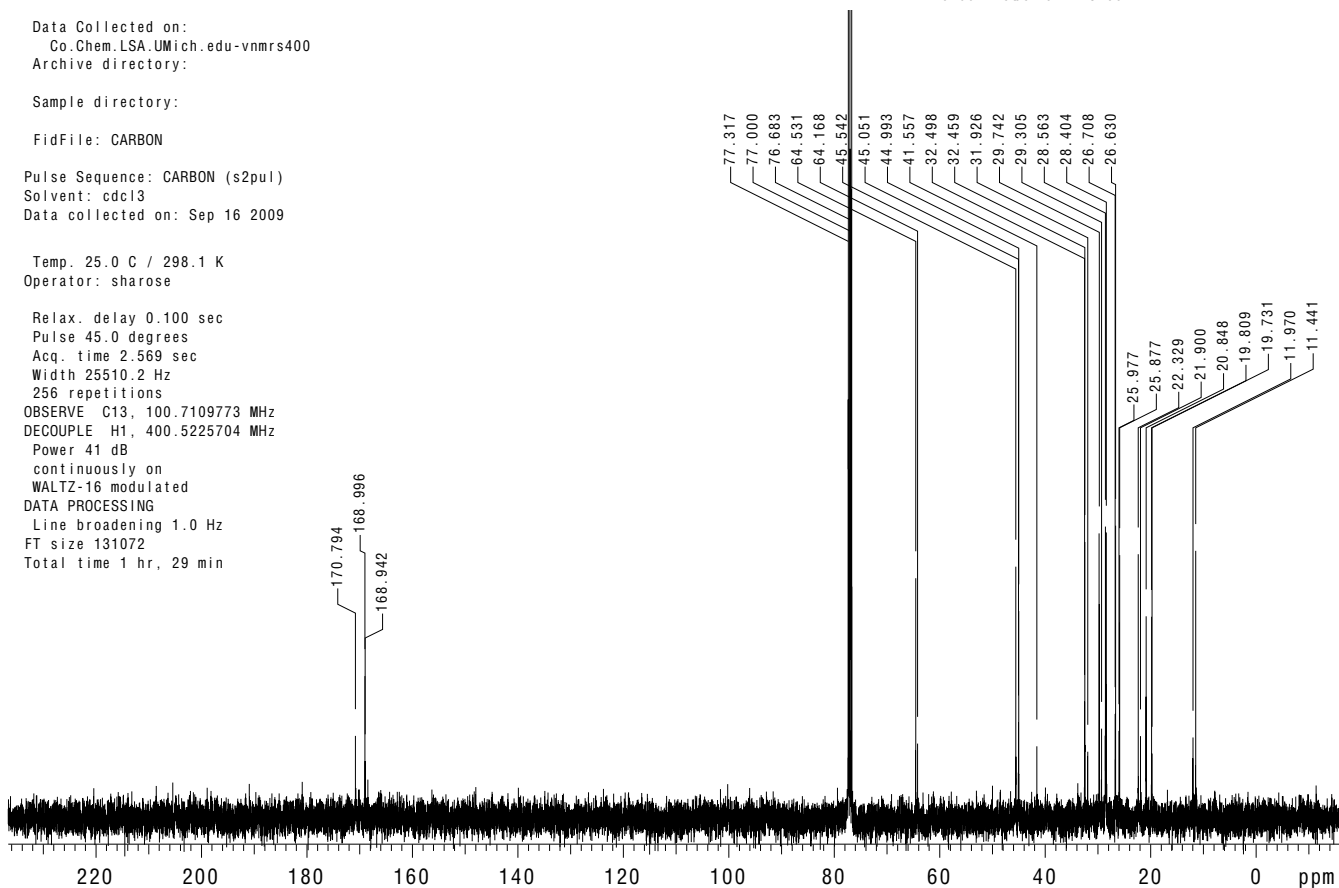

Data Collected on:  
Sn.Chem.LSA,UMich.edu-inova500  
Archive directory:

Sample directory:

FidFile: PROTON

Pulse Sequence: PROTON (s2pul)  
Solvent: cdcl3  
Data collected on: Jun 29 2009

Operator: sharose

Relax. delay 0.500 sec  
Pulse 45.0 degrees  
Acq. time 3.500 sec  
Width 7998.4 Hz  
16 repetitions  
OBSERVE H1, 499.9042604 MHz  
DATA PROCESSING  
Line broadening 0.3 Hz  
FT size 65536  
Total time 1 min 12 sec

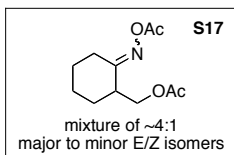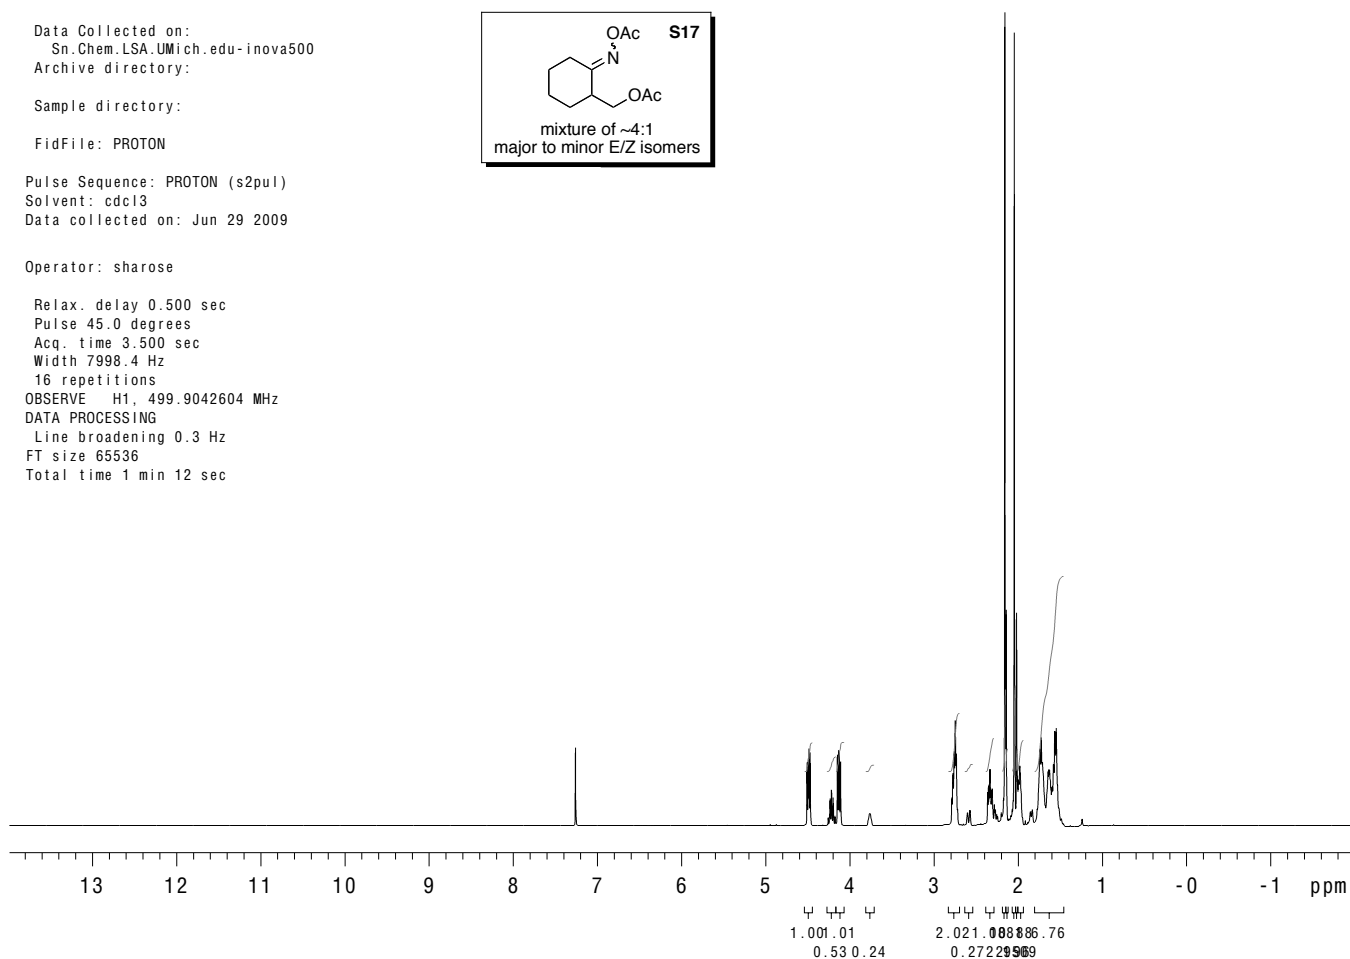

Data Collected on:  
Co.Chem.LSA,UMich.edu-vnmrs400  
Archive directory:

Sample directory:

FidFile: CARBON

Pulse Sequence: CARBON (s2pul)  
Solvent: cdcl3  
Data collected on: Jun 30 2009

Temp. 25.0 C / 298.1 K  
Operator: sharose

Relax. delay 0.100 sec  
Pulse 45.0 degrees  
Acq. time 2.569 sec  
Width 25510.2 Hz  
96 repetitions  
OBSERVE C13, 100.7109785 MHz  
DECOUPLE H1, 400.5225704 MHz  
Power 40 dB  
continuously on  
WALTZ-16 modulated  
DATA PROCESSING  
Line broadening 1.0 Hz  
FT size 131072  
Total time 44 min

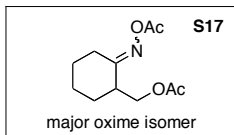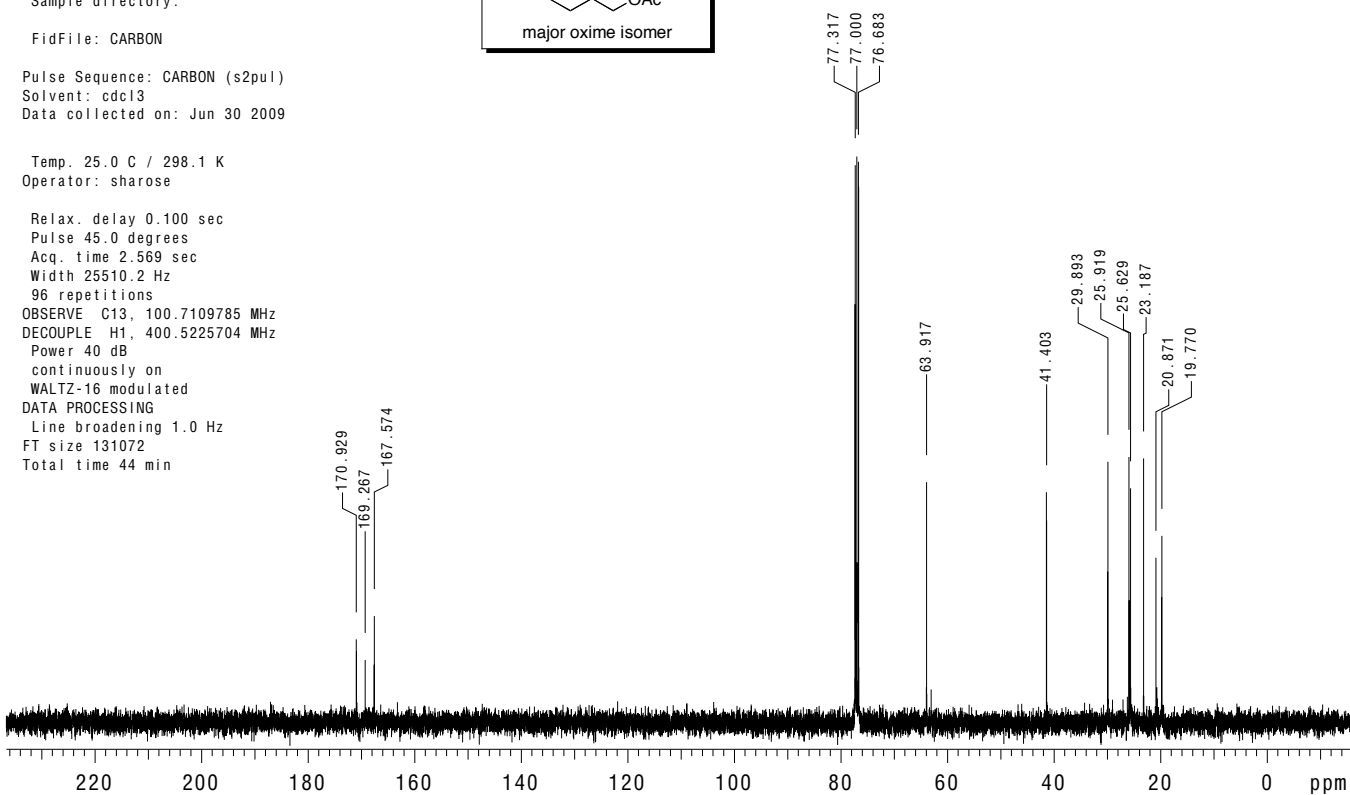

Data Collected on:  
Zr.Chem.LSA.UMich.edu-inova400  
Archive directory:

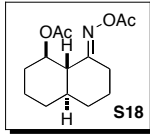

Sample directory:

FidFile: PROTON

Pulse Sequence: PROTON (s2pul)  
Solvent: cdcl3  
Data collected on: Aug 7 2009

Temp. 23.0 C / 296.1 K  
Operator: sharose

Relax. delay 0.500 sec  
Pulse 45.0 degrees  
Acq. time 3.500 sec  
Width 6399.5 Hz  
16 repetitions  
OBSERVE H1, 399.9649645 MHz  
DATA PROCESSING  
Line broadening 0.3 Hz  
FT size 65536  
Total time 1 min 12 sec

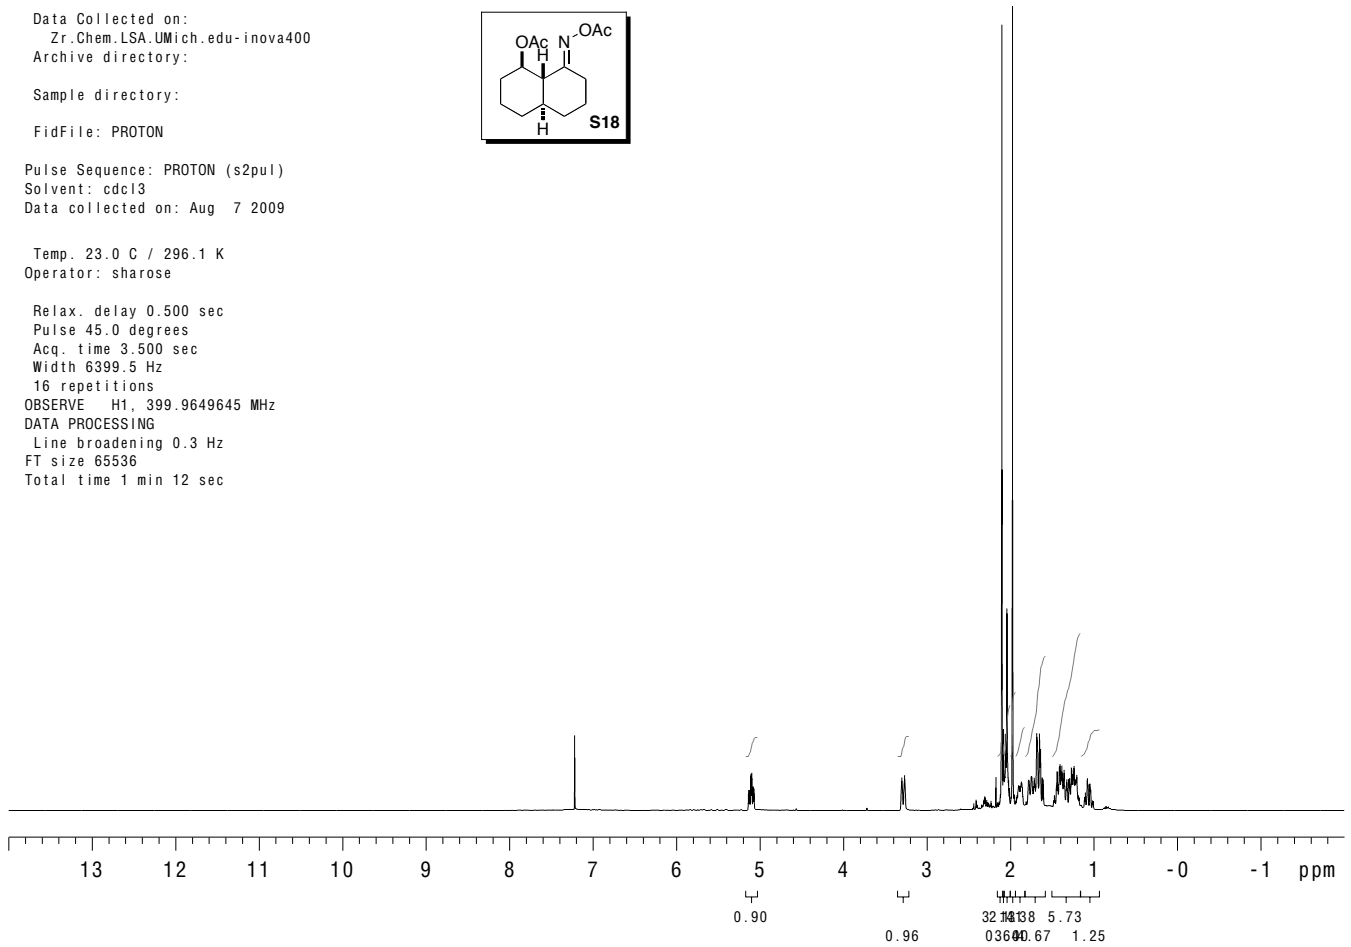

Data Collected on:  
Zr.Chem.LSA.UMich.edu-inova400  
Archive directory:

Sample directory:

FidFile: CARBON

Pulse Sequence: CARBON (s2pul)  
Solvent: cdcl3  
Data collected on: Aug 7 2009

Temp. 23.0 C / 296.1 K  
Operator: sharose

Relax. delay 0.100 sec  
Pulse 45.0 degrees  
Acq. time 2.607 sec  
Width 25141.4 Hz  
336 repetitions  
OBSERVE C13, 100.5712689 MHz  
DECOUPLE H1, 399.9669644 MHz  
Power 39 dB  
continuously on  
WALTZ-16 modulated  
DATA PROCESSING  
Line broadening 1.0 Hz  
FT size 131072  
Total time 45 min

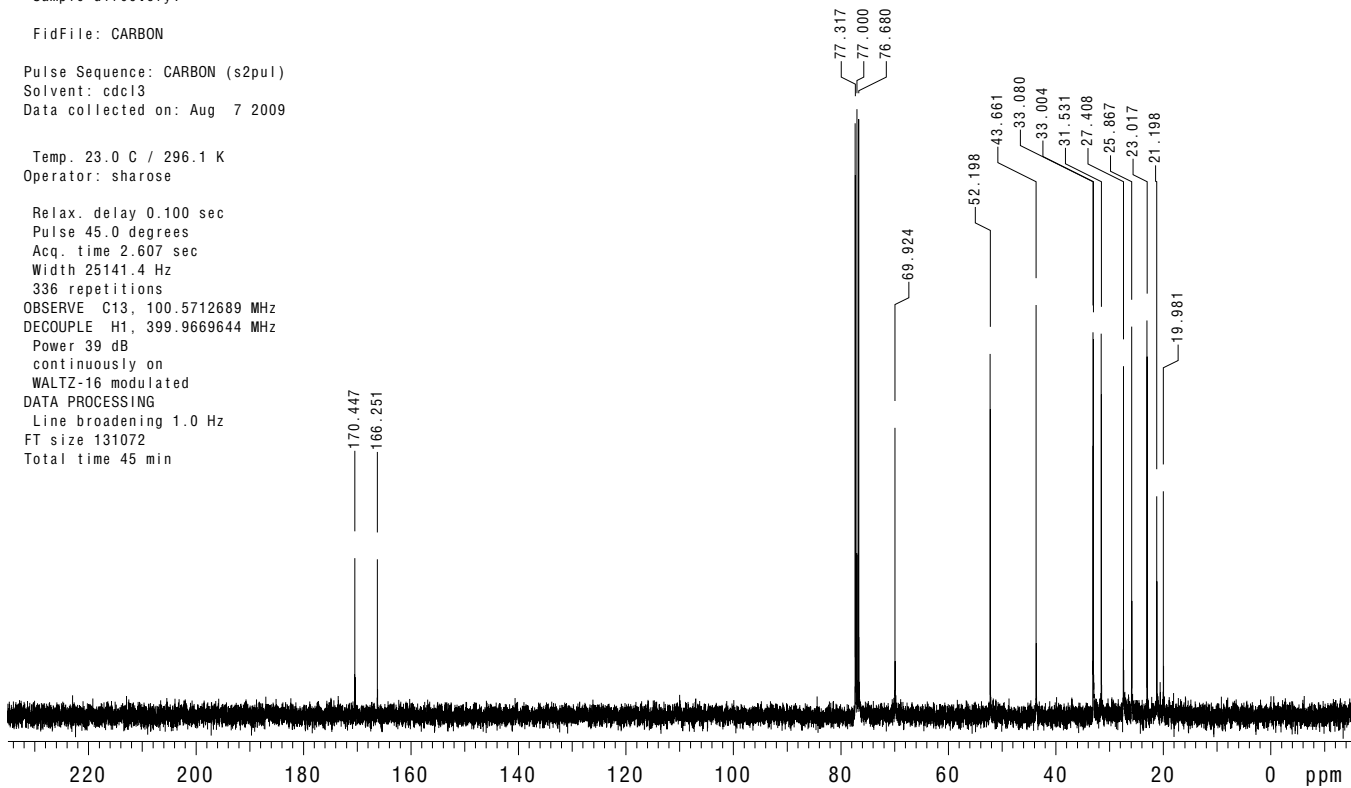

Data Collected on:  
Co.Chem.LSA.UMich.edu-vnmrs400  
Archive directory:

Sample directory:

FidFile: PROTON

Pulse Sequence: PROTON (s2pul)  
Solvent: cdcl3  
Data collected on: Nov 11 2009

Operator: sharose

Relax. delay 0.500 sec  
Pulse 45.0 degrees  
Acq. time 3.500 sec  
Width 6410.3 Hz  
16 repetitions  
OBSERVE H1, 400.5205667 MHz  
DATA PROCESSING  
Line broadening 0.3 Hz  
FT size 65536  
Total time 1 min 12 sec

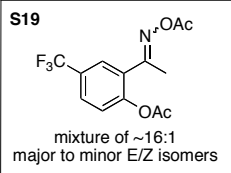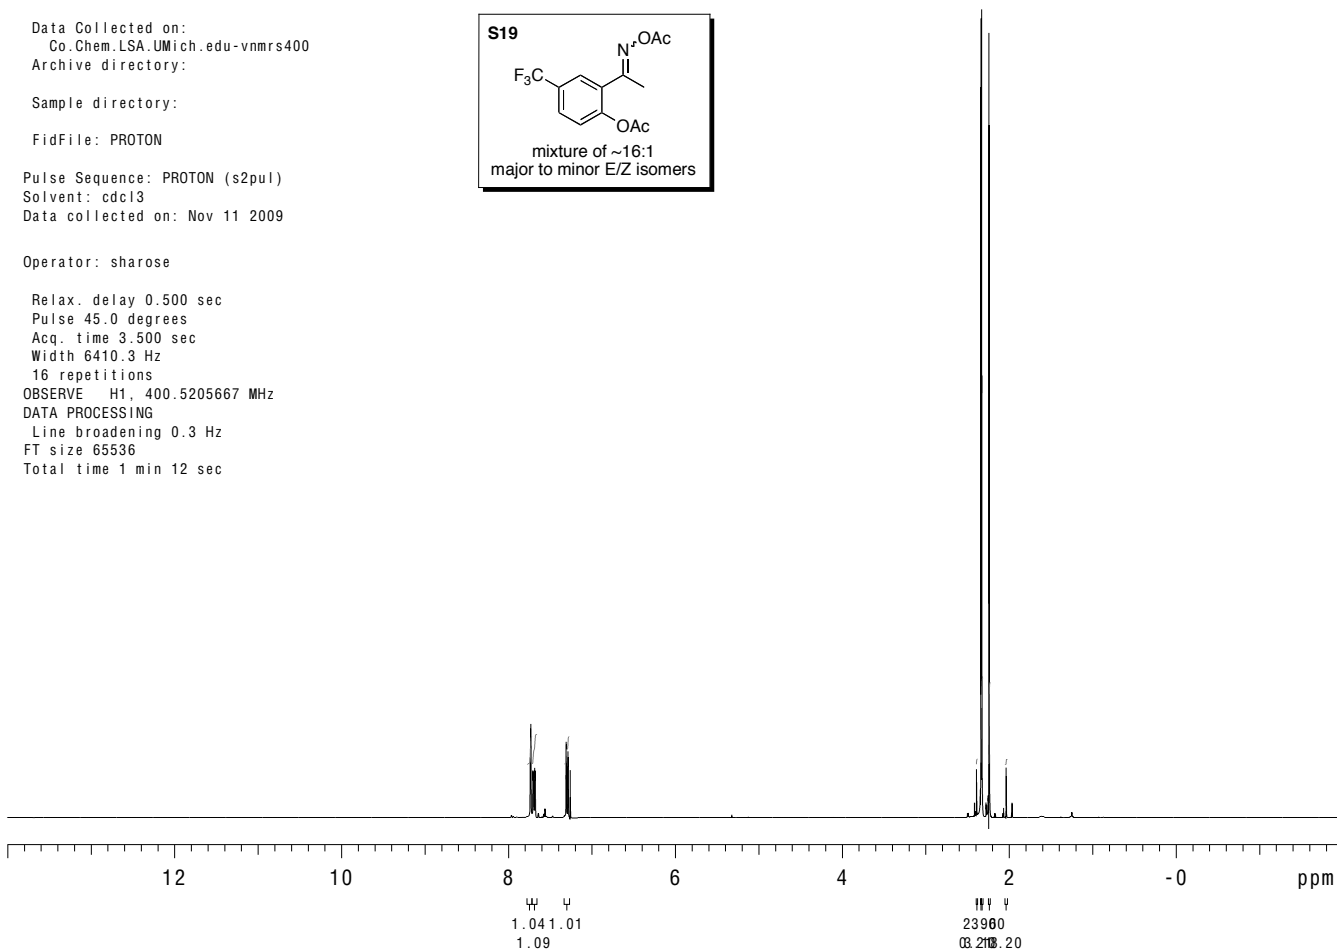

Data Collected on:  
Co.Chem.LSA.UMich.edu-vnmrs400  
Archive directory:

Sample directory:

FidFile: CARBON

Pulse Sequence: CARBON (s2pul)  
Solvent: cdcl3  
Data collected on: Nov 11 2009

Operator: sharose

Relax. delay 0.100 sec  
Pulse 45.0 degrees  
Acq. time 2.569 sec  
Width 25510.2 Hz  
688 repetitions  
OBSERVE C13, 100.7109788 MHz  
DECOUPLE H1, 400.5225704 MHz  
Power 41 dB  
continuously on  
WALTZ-16 modulated  
DATA PROCESSING  
Line broadening 1.0 Hz  
FT size 131072  
Total time 44 min

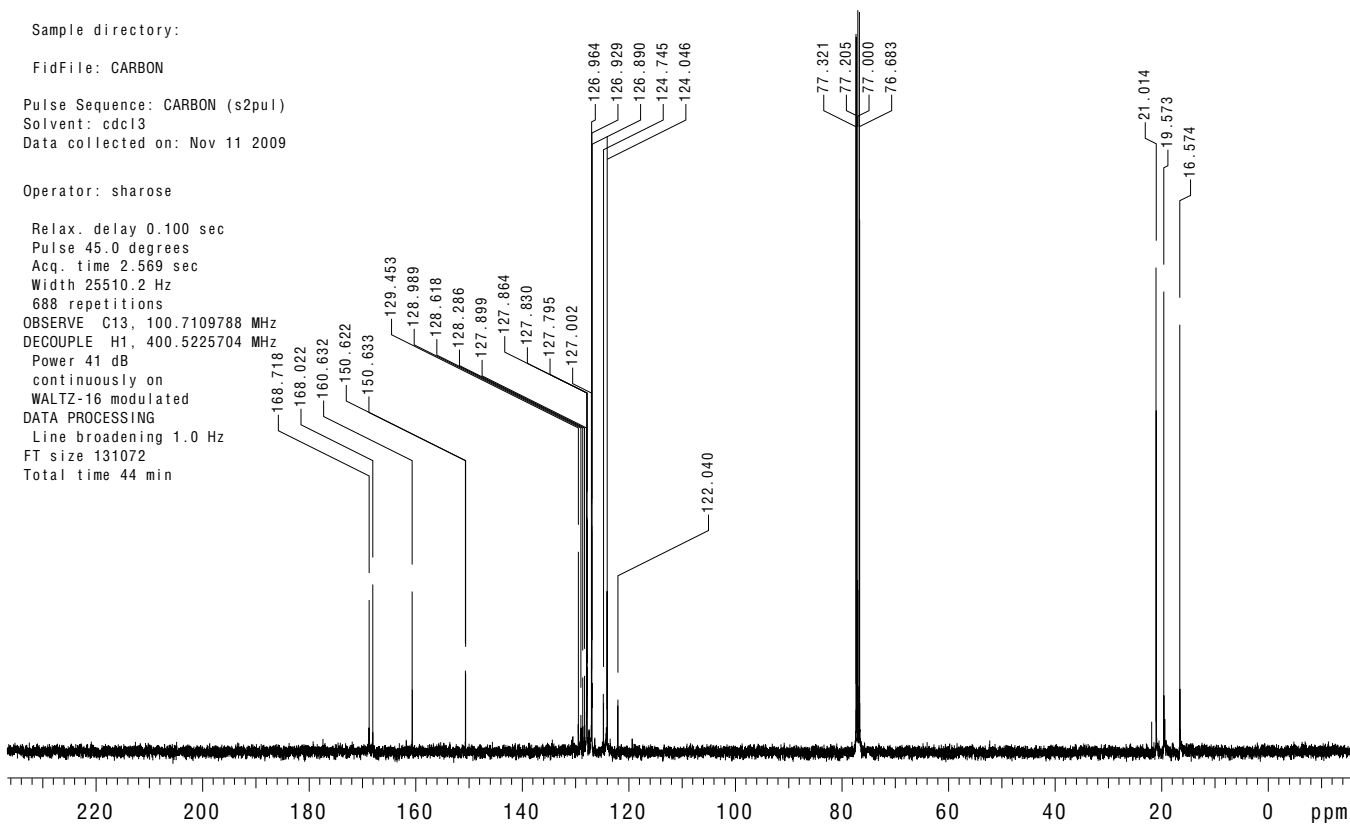



Data Collected on:  
Co.Chem.LSA.UMich.edu-vnmrs400  
Archive directory:

Sample directory:

FidFile: FLUORINE

Pulse Sequence: FLUORINE (s2pul)  
Solvent: cdcl3  
Data collected on: Nov 11 2009

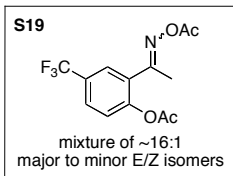

Operator: sharose

Relax. delay 1.000 sec  
Pulse 30.0 degrees  
Acq. time 0.734 sec  
Width 89285.7 Hz  
16 repetitions  
OBSERVE F19, 376.8658745 MHz  
DATA PROCESSING  
Line broadening 0.5 Hz  
FT size 131072  
Total time 0 min 31 sec

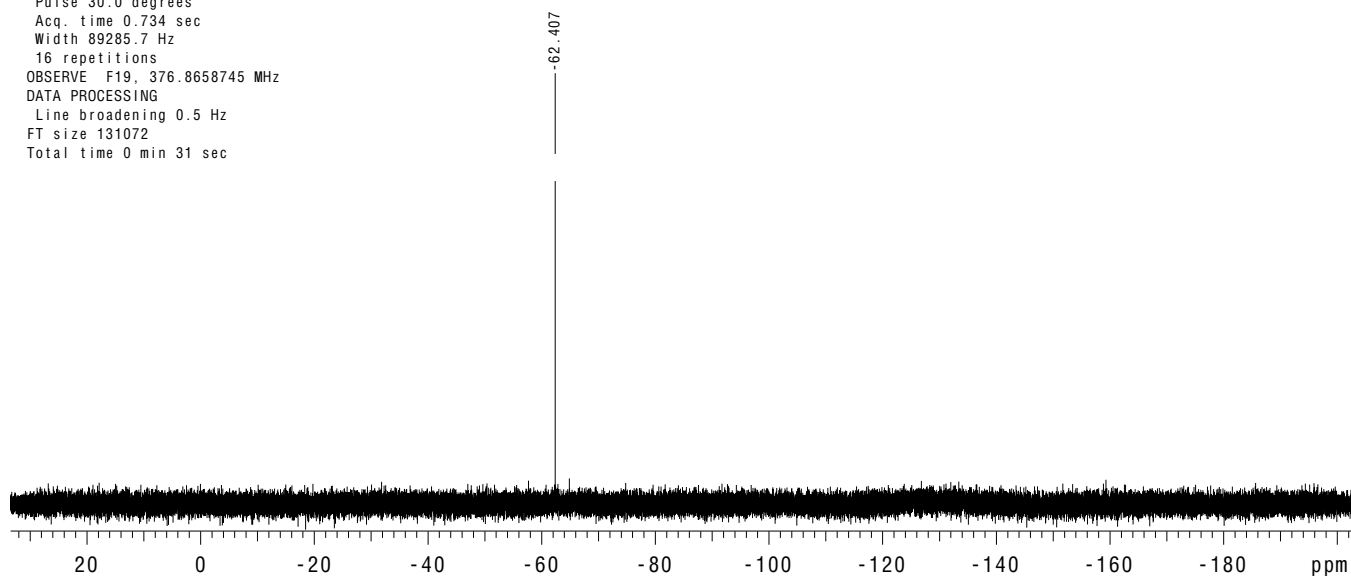

Data Collected on:  
Ga.Chem.LSA.UMich.Edu-vnmrs400  
Archive directory:

Sample directory:

FidFile: PROTON

Pulse Sequence: PROTON (s2pul)  
Solvent: cdcl3  
Data collected on: Dec 17 2008

Temp. 25.0 C / 298.1 K  
Operator: sharose

Relax. delay 1.000 sec  
Pulse 45.0 degrees  
Acq. time 2.556 sec  
Width 6410.3 Hz  
16 repetitions  
OBSERVE H1, 399.5389189 MHz  
DATA PROCESSING  
FT size 32768  
Total time 1 min 5 sec

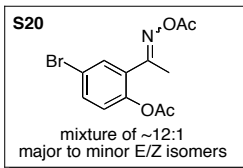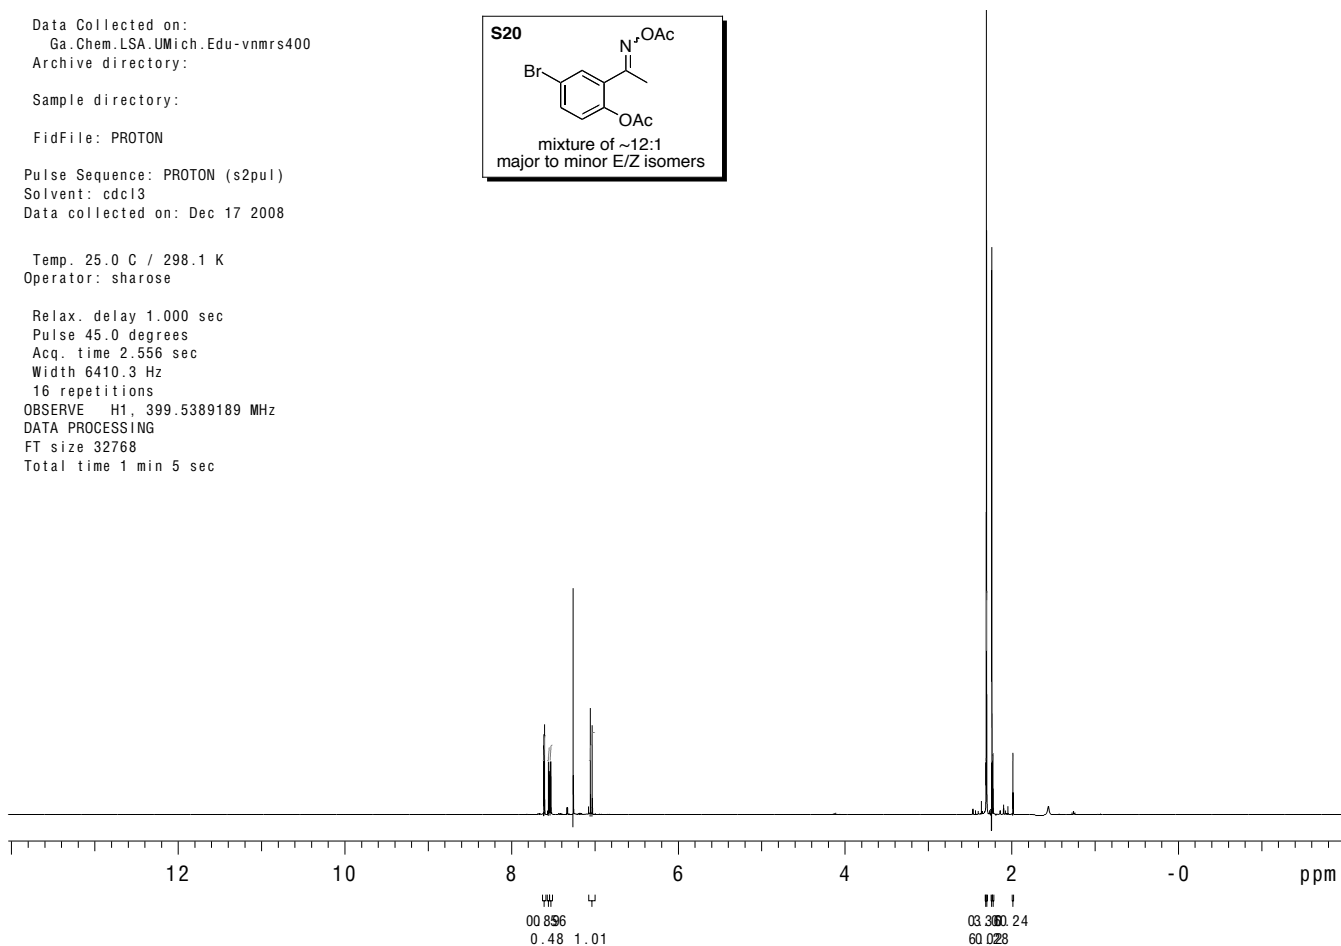

Data Collected on:  
Co.Chem.LSA.UMich.Edu-vnmrs400  
Archive directory:

Sample directory:

FidFile: CARBON

Pulse Sequence: CARBON (s2pul)  
Solvent: cdcl3  
Data collected on: Oct 10 2008

Operator: sharose

Relax. delay 1.000 sec  
Pulse 45.0 degrees  
Acq. time 1.285 sec  
Width 25510.2 Hz  
48 repetitions  
OBSERVE C13, 100.7132942 MHz  
DECOUPLE H1, 400.5317616 MHz  
Power 40 dB  
continuously on  
WALTZ-16 modulated  
DATA PROCESSING  
Line broadening 0.5 Hz  
FT size 65536  
Total time 38 min

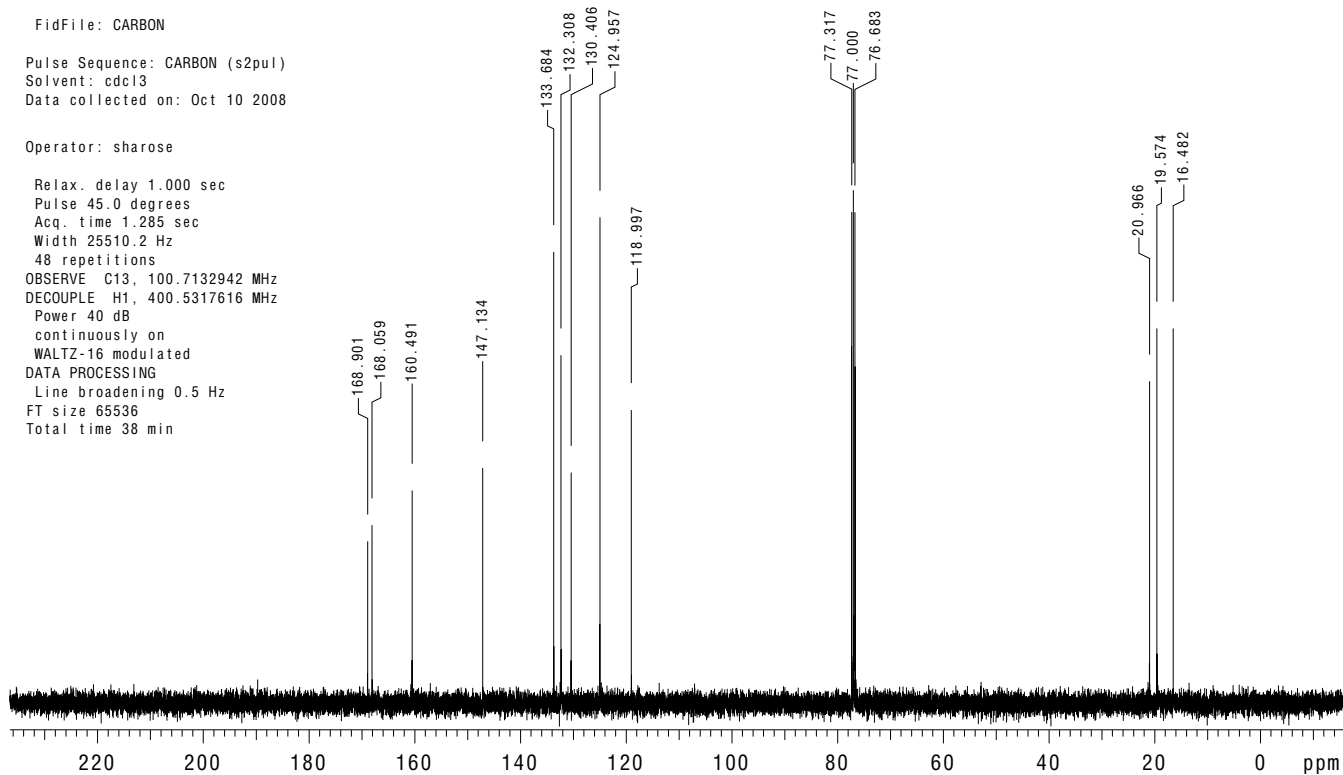

Sample directory:

FidFile: Proton

Pulse Sequence: Proton (s2pul)  
Solvent: CDCl3  
Data collected on: Aug 27 2008

Operator: sharose  
VNMR5-500 "Dy.Chem.LSA.UMich.edu"

Relax. delay 0.100 sec  
Pulse 45.0 degrees  
Acq. time 3.000 sec  
Width 8003.2 Hz  
16 repetitions  
OBSERVE H1, 499.9042609 MHz  
DATA PROCESSING  
Line broadening 0.2 Hz  
FT size 65536  
Total time 0 min 24 sec

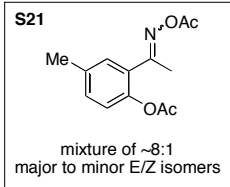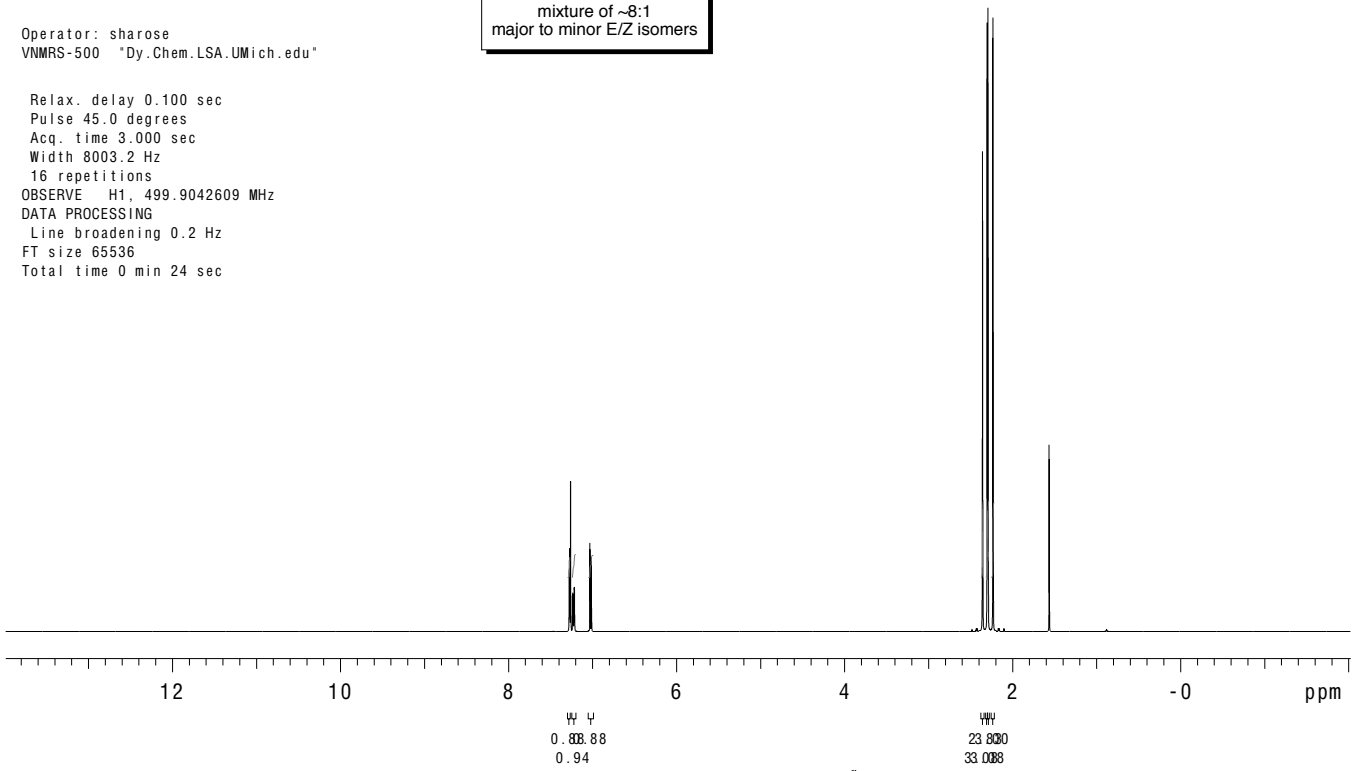

Data Collected on:  
Co.Chem.LSA.UMich.Edu-vnmrs400  
Archive directory:

Sample directory:

FidFile: CARBON

Pulse Sequence: CARBON (s2pul)  
Solvent: cdcl3  
Data collected on: Aug 27 2008

Operator: sharose

Relax. delay 1.000 sec  
Pulse 45.0 degrees  
Acq. time 1.285 sec  
Width 25510.2 Hz  
400 repetitions  
OBSERVE C13, 100.7132880 MHz  
DECOUPLE H1, 400.5317616 MHz  
Power 40 dB  
continuously on  
WALTZ-16 modulated  
DATA PROCESSING  
Line broadening 0.5 Hz  
FT size 65536  
Total time 1 hr, 16 min

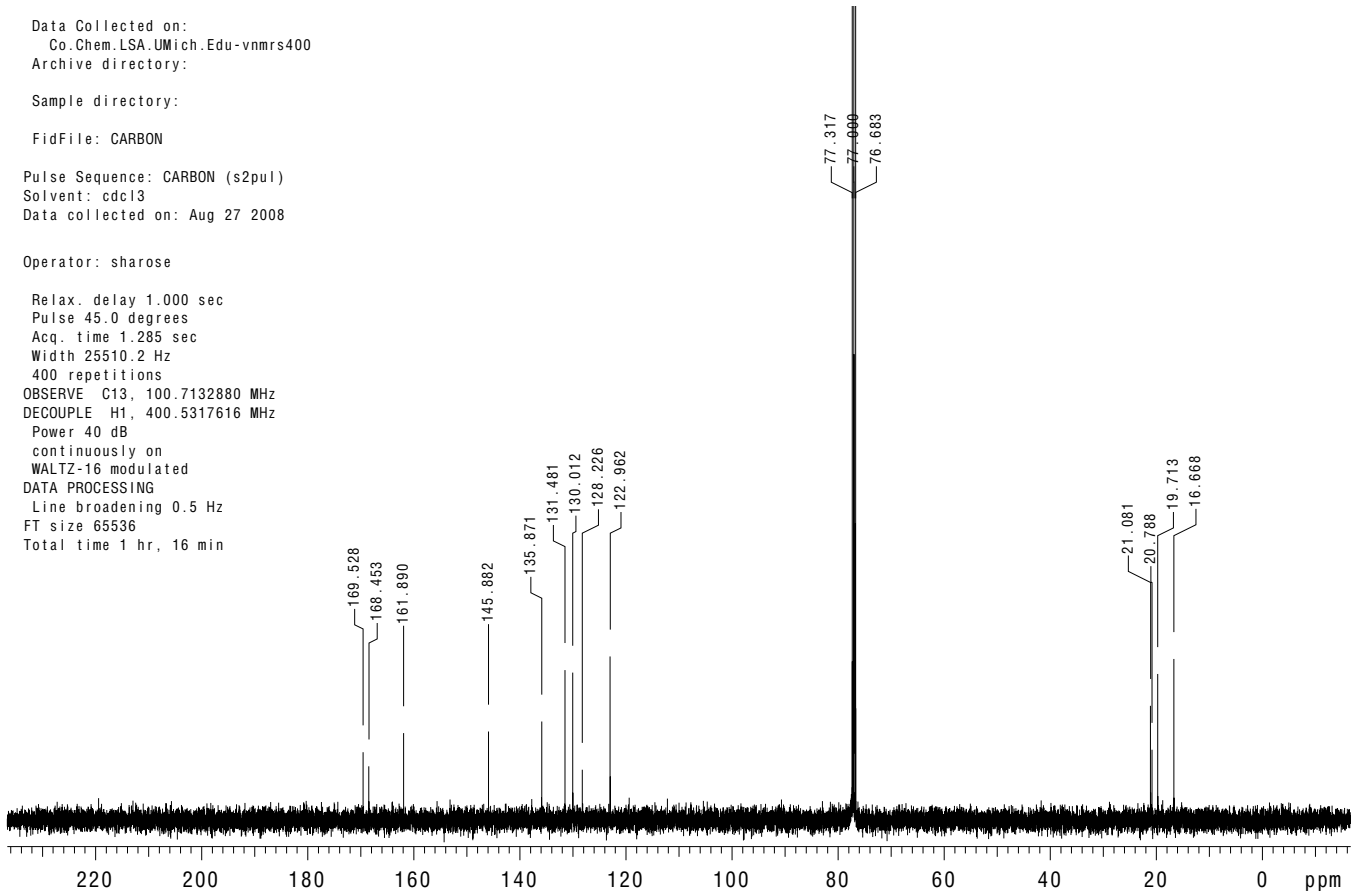

Archive directory:

Sample directory:

FidFile: Proton

Pulse Sequence: Proton (s2pul)

Solvent: cdcl3

Data collected on: Nov 20 2008

Operator: sharose  
VNMRS-500 "Dy.Chem.LSA.UMich.edu"

Relax. delay 0.500 sec  
Pulse 45.0 degrees  
Acq. time 3.000 sec  
Width 6399.5 Hz  
16 repetitions  
OBSERVE H1, 399.9649486 MHz  
DATA PROCESSING  
Line broadening 0.2 Hz  
FT size 65536  
Total time 0 min 24 sec

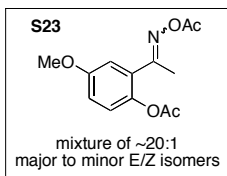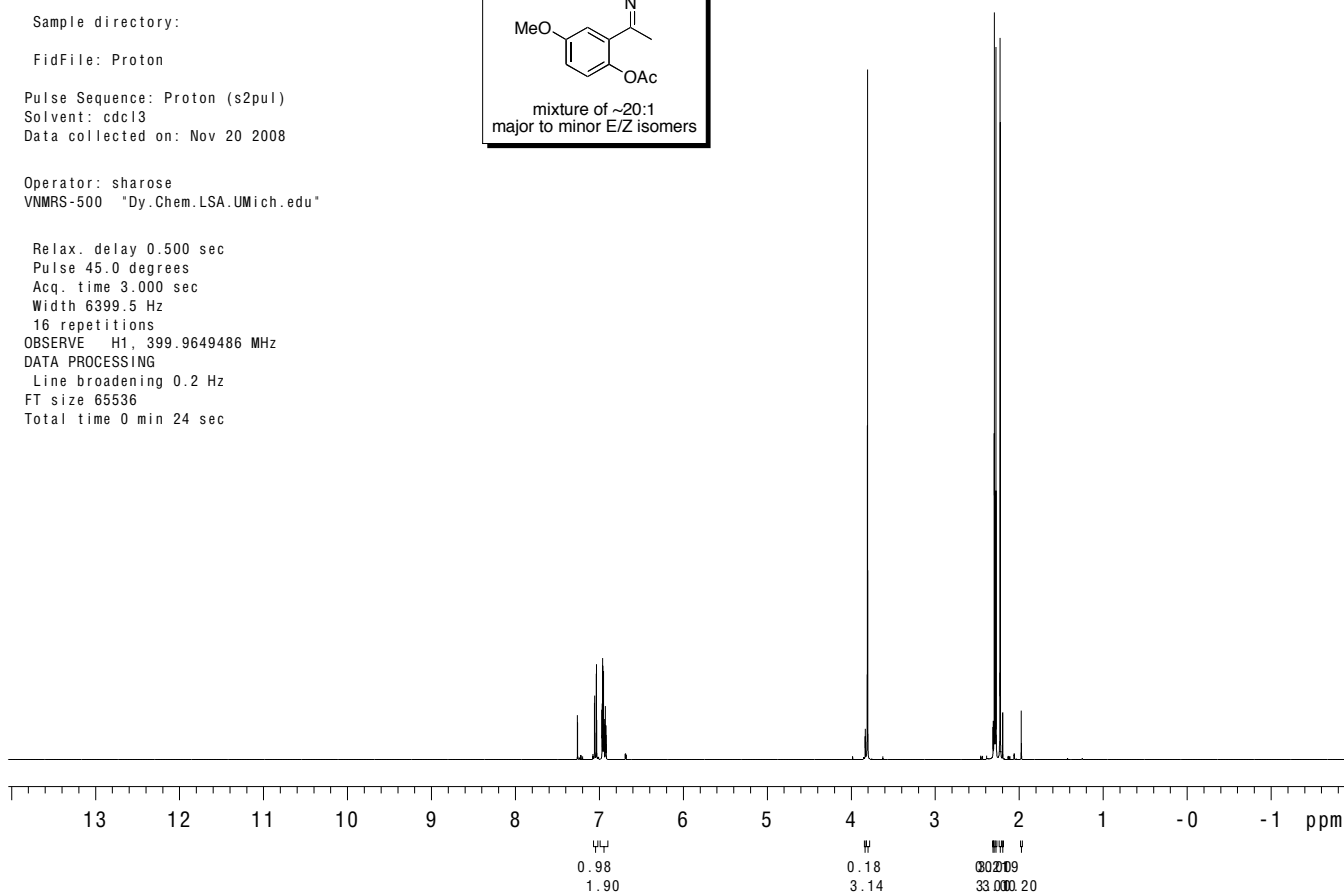

Sample directory:

FidFile: Carbon

Pulse Sequence: Carbon (s2pul)

Solvent: cdcl3

Data collected on: Nov 20 2008

Operator: sharose  
VNMRS-500 "Dy.Chem.LSA.UMich.edu"

Relax. delay 0.100 sec  
Pulse 30.0 degrees  
Acq. time 1.300 sec  
Width 24140.0 Hz  
320 repetitions  
OBSERVE C13, 100.5712699 MHz  
DECOUPLE H1, 399.9669644 MHz  
Power 39 dB  
continuously on  
WALTZ-16 modulated  
DATA PROCESSING  
Line broadening 0.8 Hz  
FT size 65536  
Total time 0 min 24 sec

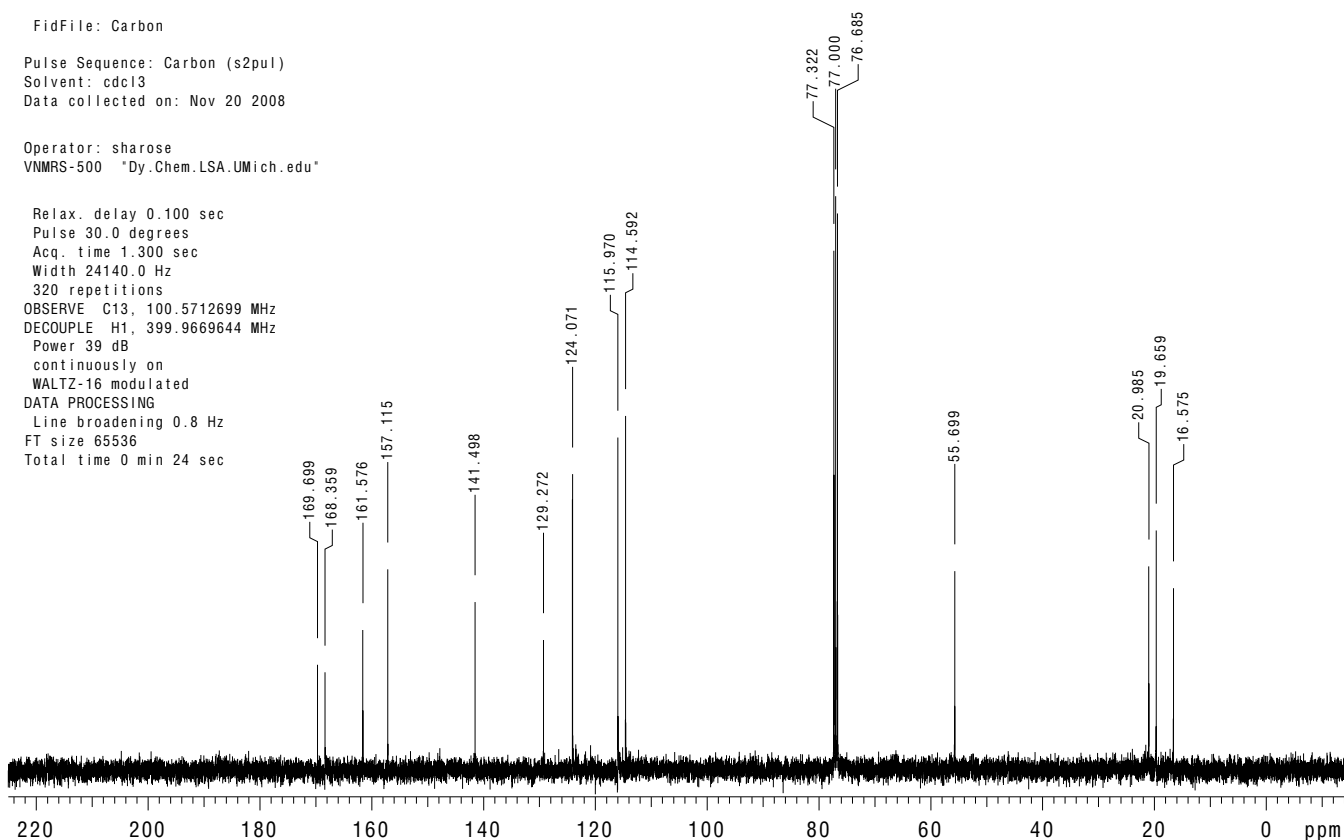

Data Collected on:  
 Zr.Chem.LSA.UMich.edu-inova400  
 Archive directory:  
 Sample directory:  
 FidFile: PROTON  
 Pulse Sequence: PROTON (s2pul)  
 Solvent: cdcl3  
 Data collected on: Aug 28 2009

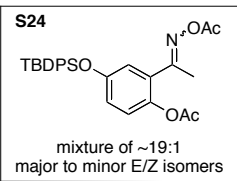

Operator: sharose  
 Relax. delay 0.500 sec  
 Pulse 45.0 degrees  
 Acq. time 3.500 sec  
 Width 6399.5 Hz  
 16 repetitions  
 OBSERVE H1, 399.9649492 MHz  
 DATA PROCESSING  
 Line broadening 0.3 Hz  
 FT size 65536  
 Total time 1 min 12 sec

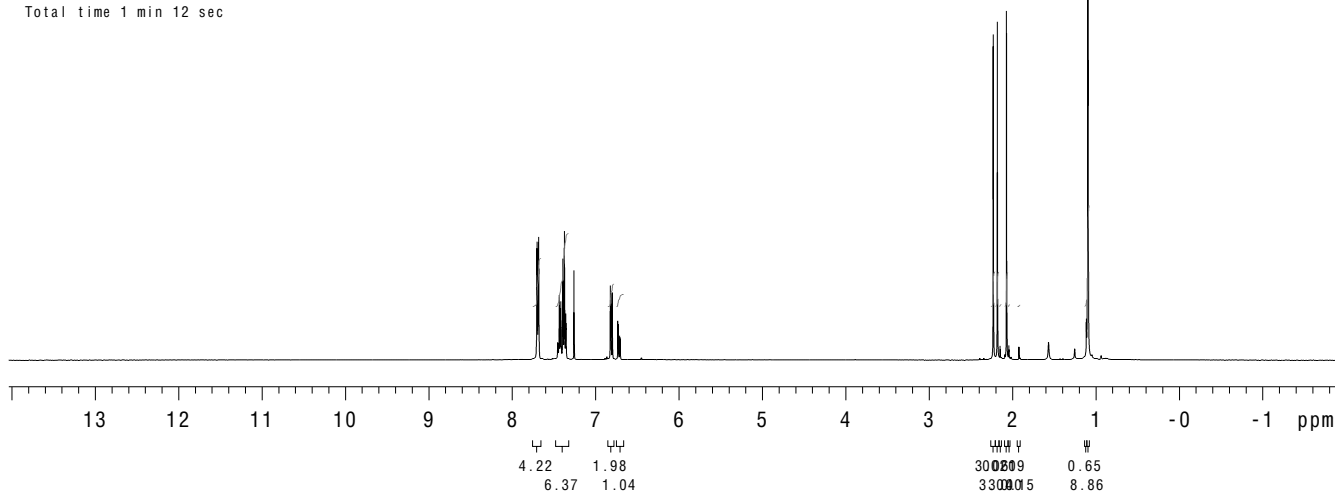

Data Collected on:  
 Zr.Chem.LSA.UMich.edu-inova400  
 Archive directory:

Sample directory:  
 FidFile: CARBON

Pulse Sequence: CARBON (s2pul)  
 Solvent: cdcl3  
 Data collected on: Aug 26 2009

Temp. 25.0 C / 298.1 K  
 Operator: sharose

Relax. delay 0.100 sec  
 Pulse 45.0 degrees  
 Acq. time 2.607 sec  
 Width 25141.4 Hz  
 160 repetitions  
 OBSERVE C13, 100.5712678 MHz  
 DECOUPLE H1, 399.9669644 MHz  
 Power 39 dB  
 continuously on  
 WALTZ-16 modulated  
 DATA PROCESSING  
 Line broadening 1.0 Hz  
 FT size 131072  
 Total time 11 min

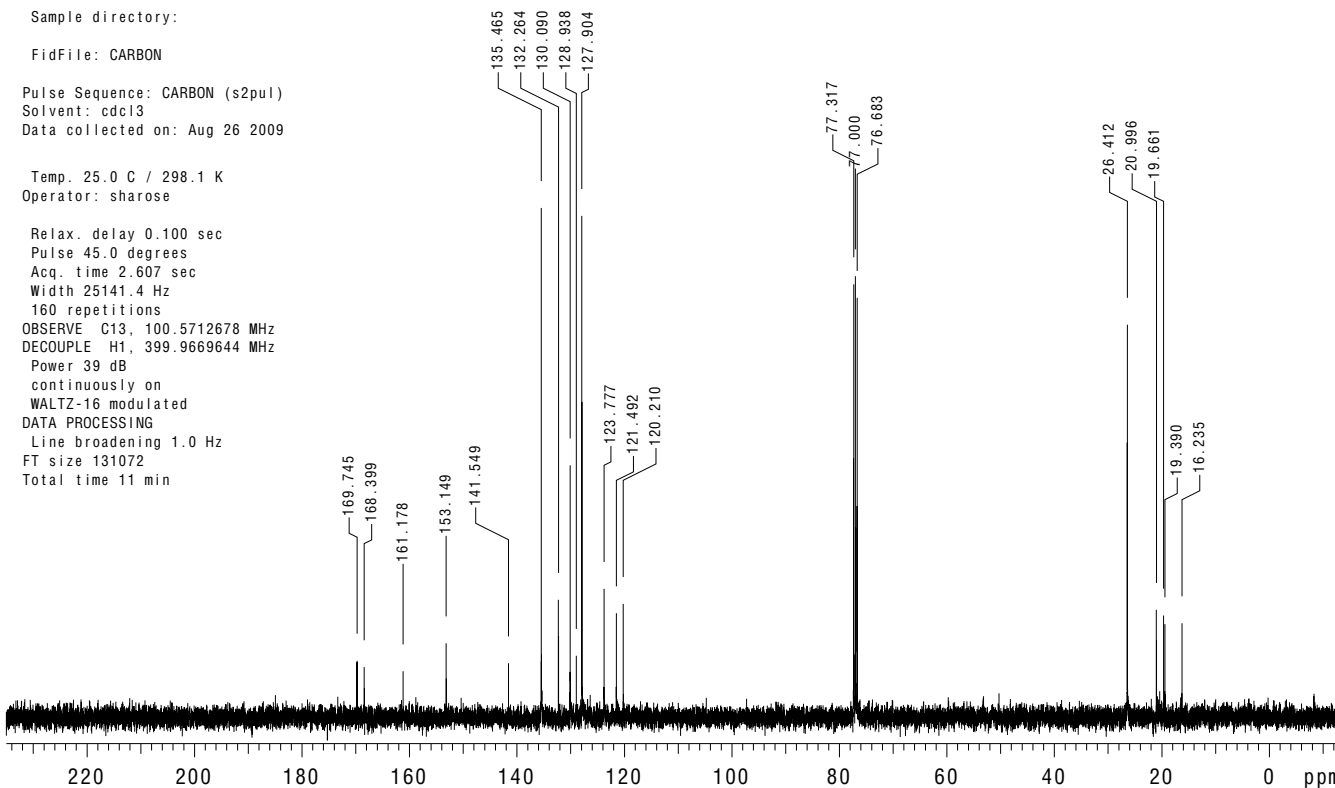

Data Collected on:  
Sn.Chem.LSA.UMich.edu-inova500  
Archive directory:

Sample directory:

FidFile: PROTON

Pulse Sequence: PROTON (s2pul)  
Solvent: CDCl3  
Data collected on: Feb 19 2009

Operator: sharose

Relax. delay 0.100 sec  
Pulse 45.0 degrees  
Acq. time 4.097 sec  
Width 7998.4 Hz  
16 repetitions  
OBSERVE H1, 499.9042611 MHz  
DATA PROCESSING  
Line broadening 0.2 Hz  
FT size 65536  
Total time 1 min 16 sec

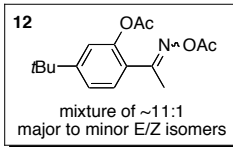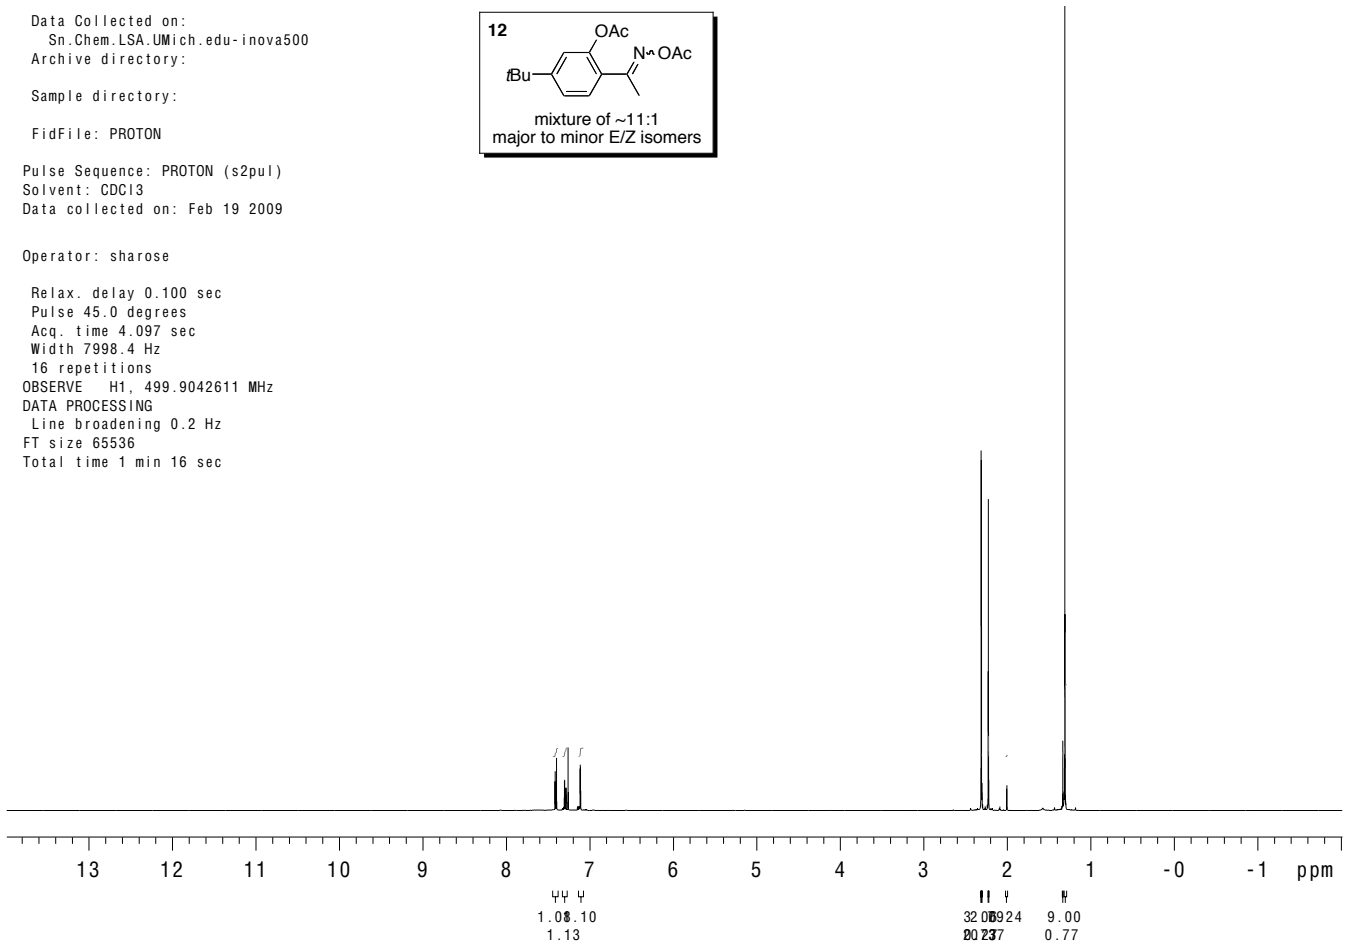

Sample directory:

FidFile: CARBON

Pulse Sequence: CARBON (s2pul)  
Solvent: cdcl3  
Data collected on: Feb 19 2009

Temp. 25.0 C / 298.1 K  
Operator: sharose

Relax. delay 1.000 sec  
Pulse 45.0 degrees  
Acq. time 1.285 sec  
Width 25510.2 Hz  
320 repetitions  
OBSERVE C13, 100.7132904 MHz  
DECOUPLE H1, 400.5317616 MHz  
Power 40 dB  
continuously on  
WALTZ-16 modulated  
DATA PROCESSING  
Line broadening 0.5 Hz  
FT size 65536  
Total time 38 min

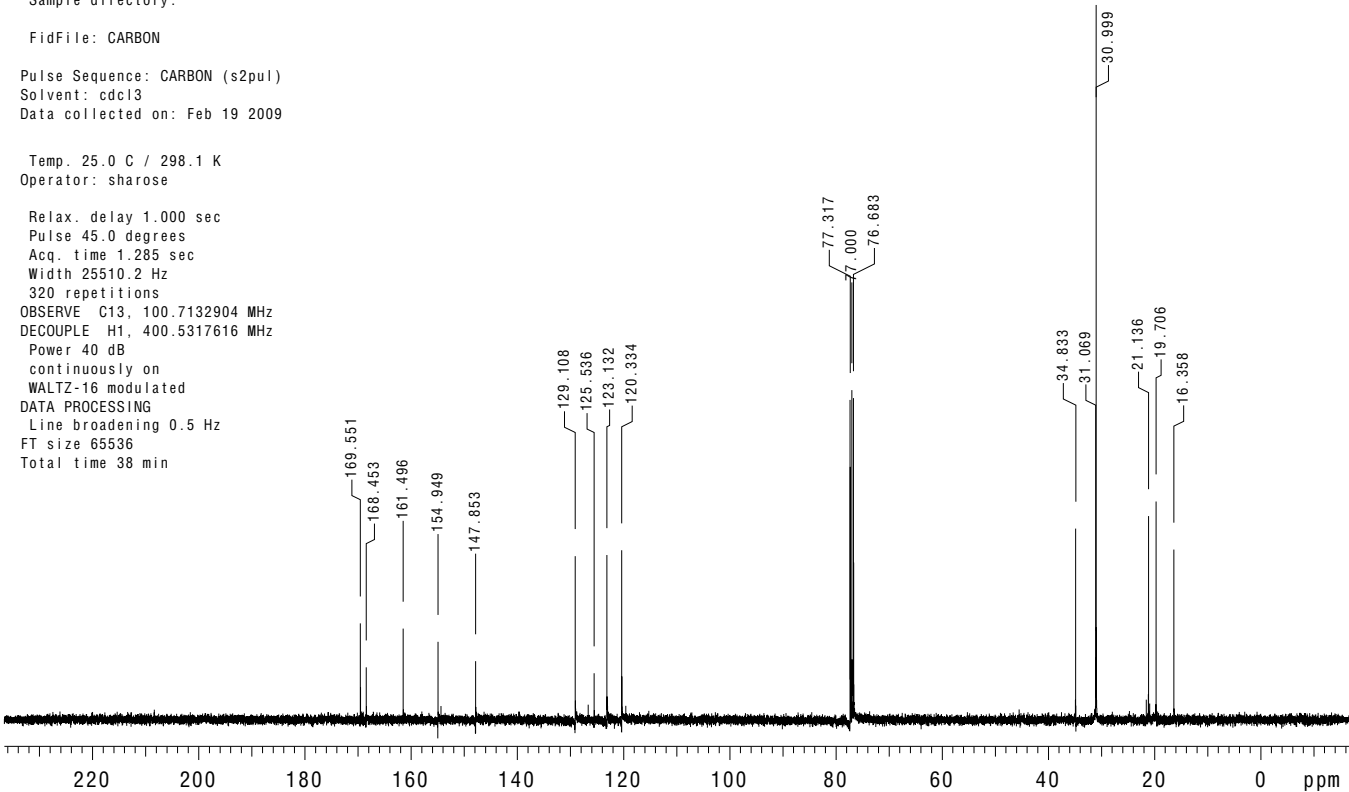

Data Collected on:  
Co.Chem.LSA.UMich.Edu-vnmrs400  
Archive directory:

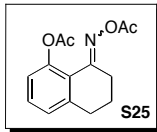

Sample directory:

FidFile: PROTON

Pulse Sequence: PROTON (s2pul)  
Solvent: cdcl3  
Data collected on: Feb 4 2009

Operator: sharose

Relax. delay 1.000 sec  
Pulse 45.0 degrees  
Acq. time 2.556 sec  
Width 6410.3 Hz  
16 repetitions  
OBSERVE H1, 400.5297586 MHz  
DATA PROCESSING  
FT size 32768  
Total time 1 min 5 sec

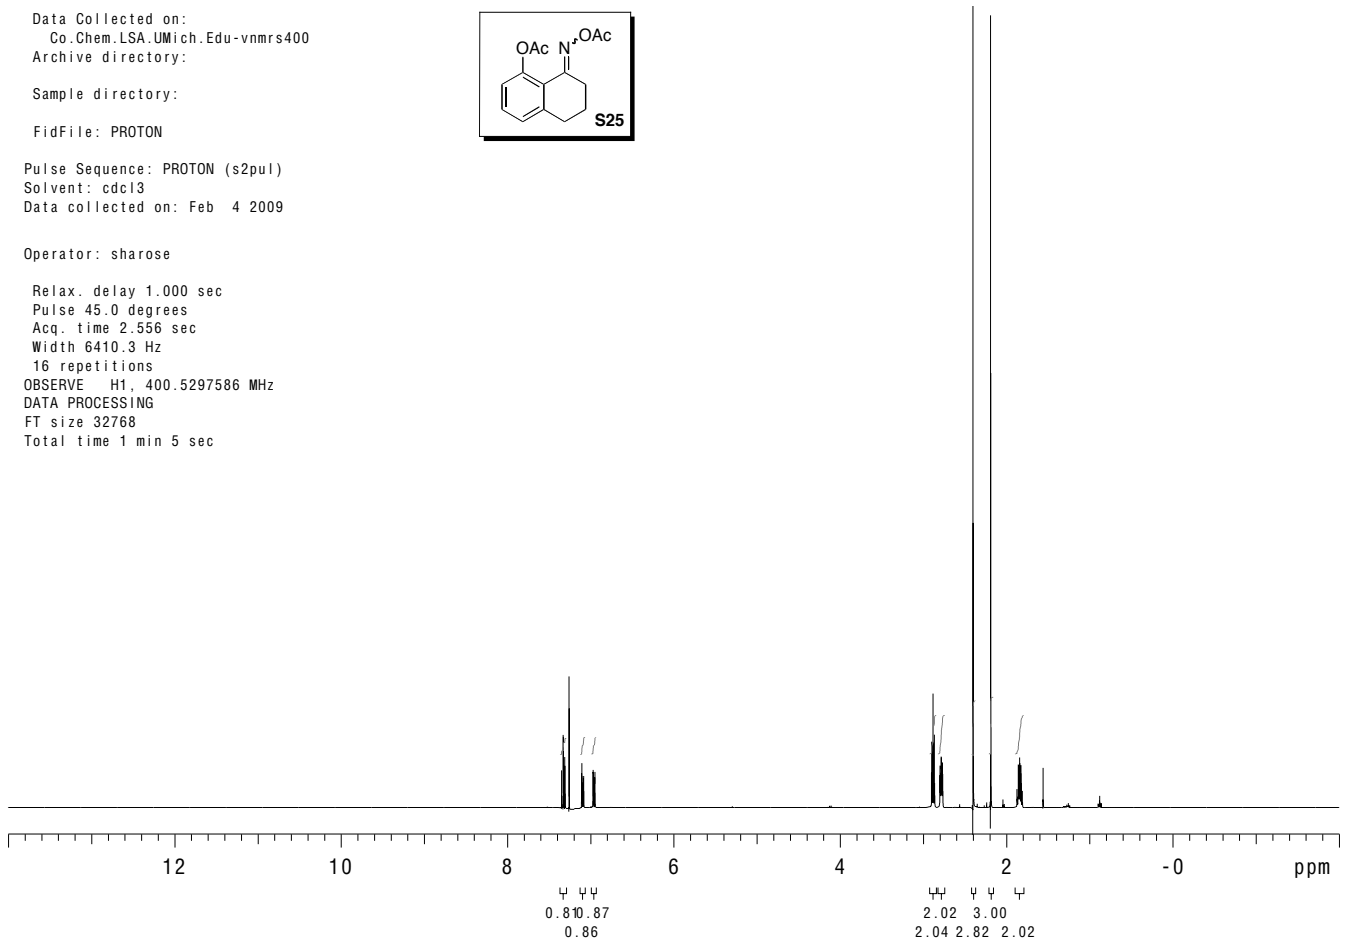

Data Collected on:  
Co.Chem.LSA.UMich.edu-vnmrs400  
Archive directory:

Sample directory:

FidFile: CARBON

Pulse Sequence: CARBON (s2pul)  
Solvent: cdcl3  
Data collected on: Sep 16 2009

Temp. 25.0 C / 298.1 K  
Operator: sharose

Relax. delay 0.100 sec  
Pulse 45.0 degrees  
Acq. time 2.569 sec  
Width 25510.2 Hz  
112 repetitions  
OBSERVE C13, 100.7109796 MHz  
DECOUPLE H1, 400.5225704 MHz  
Power 41 dB  
continuously on  
WALTZ-16 modulated  
DATA PROCESSING  
Line broadening 1.0 Hz  
FT size 131072  
Total time 44 min

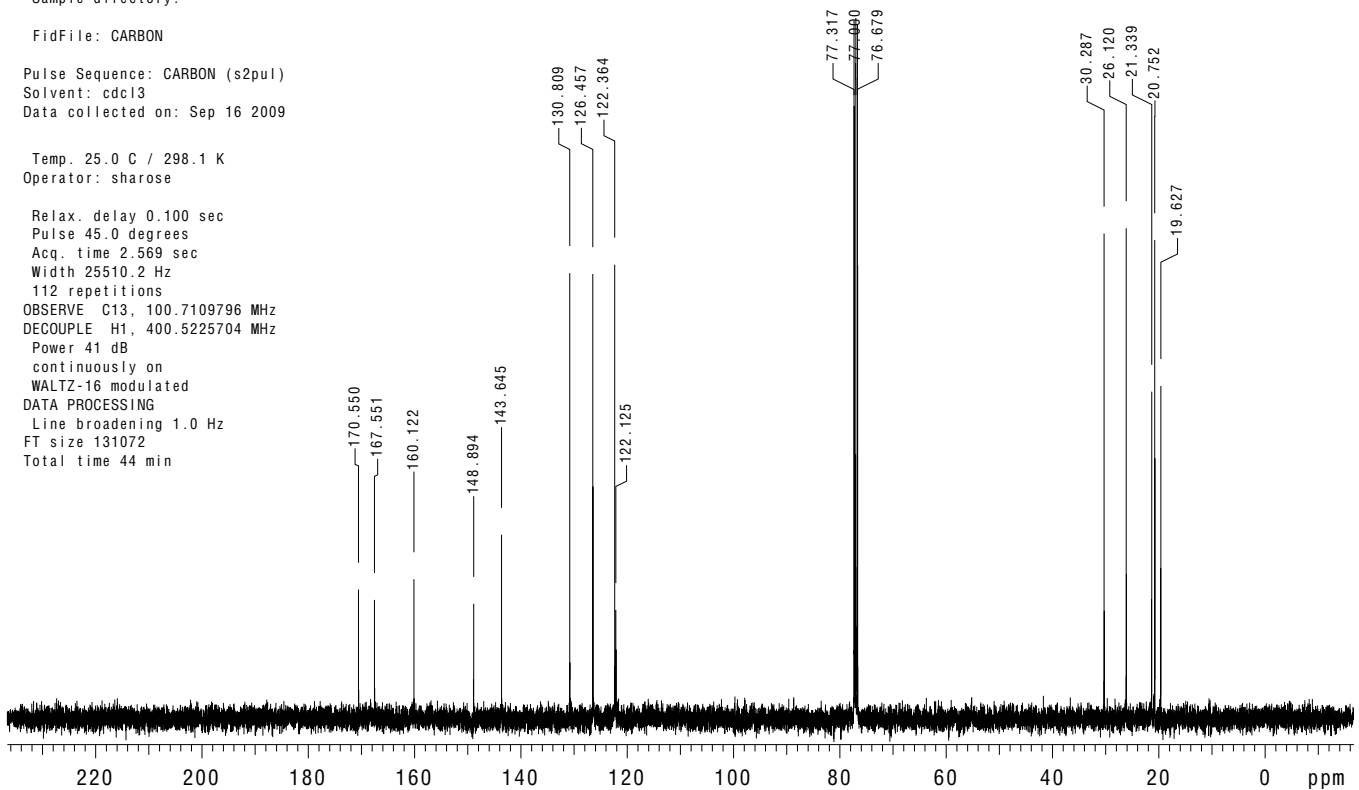

Sample directory:

FidFile: Proton

Pulse Sequence: Proton (s2pul)  
Solvent: cdcl3  
Data collected on: Jul 19 2008

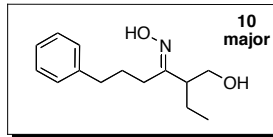

Operator: sharose  
VNMR5-500 "Dy.Chem.LSA.UMich.edu"

Relax. delay 0.500 sec  
Pulse 45.0 degrees  
Acq. time 3.000 sec  
Width 6399.5 Hz  
16 repetitions  
OBSERVE H1, 399.9649492 MHz  
DATA PROCESSING  
Line broadening 0.2 Hz  
FT size 65536  
Total time 0 min 24 sec

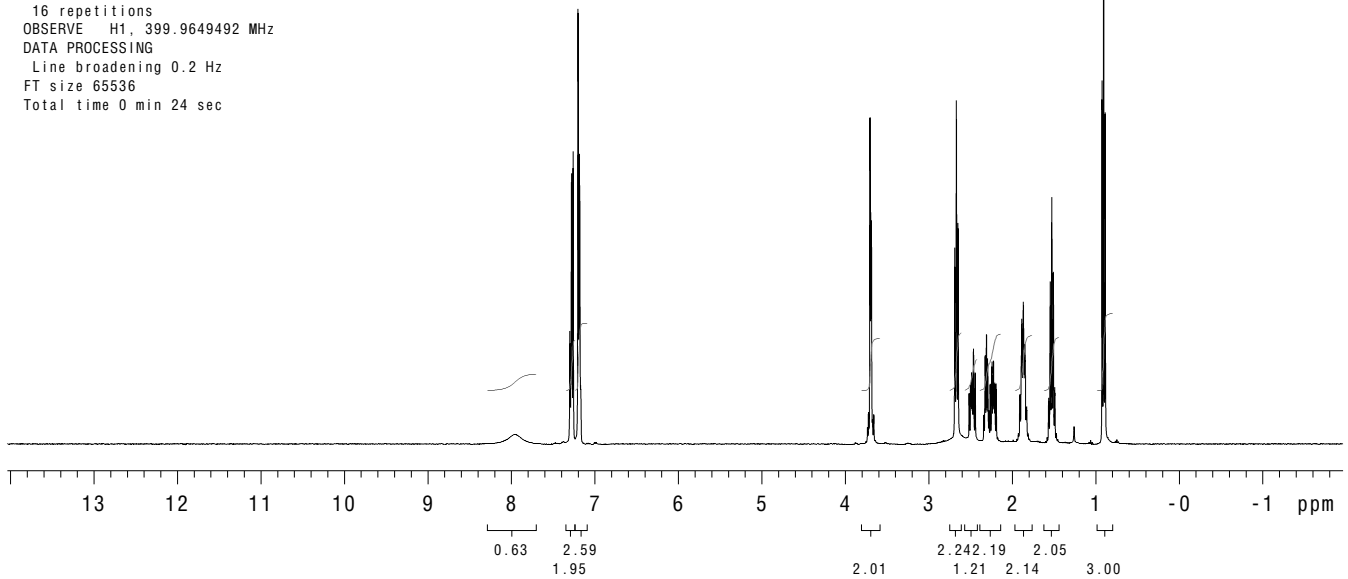

Archive directory:

Sample directory:

FidFile: Carbon

Pulse Sequence: Carbon (s2pul)  
Solvent: cdcl3  
Data collected on: Jul 19 2008

Operator: sharose  
VNMR5-500 "Dy.Chem.LSA.UMich.edu"

Relax. delay 0.100 sec  
Pulse 30.0 degrees  
Acq. time 1.300 sec  
Width 24140.0 Hz  
208 repetitions  
OBSERVE C13, 100.5712677 MHz  
DECOUPLE H1, 399.9669644 MHz  
Power 39 dB  
continuously on  
WALTZ-16 modulated  
DATA PROCESSING  
Line broadening 0.8 Hz  
FT size 65536  
Total time 0 min 24 sec

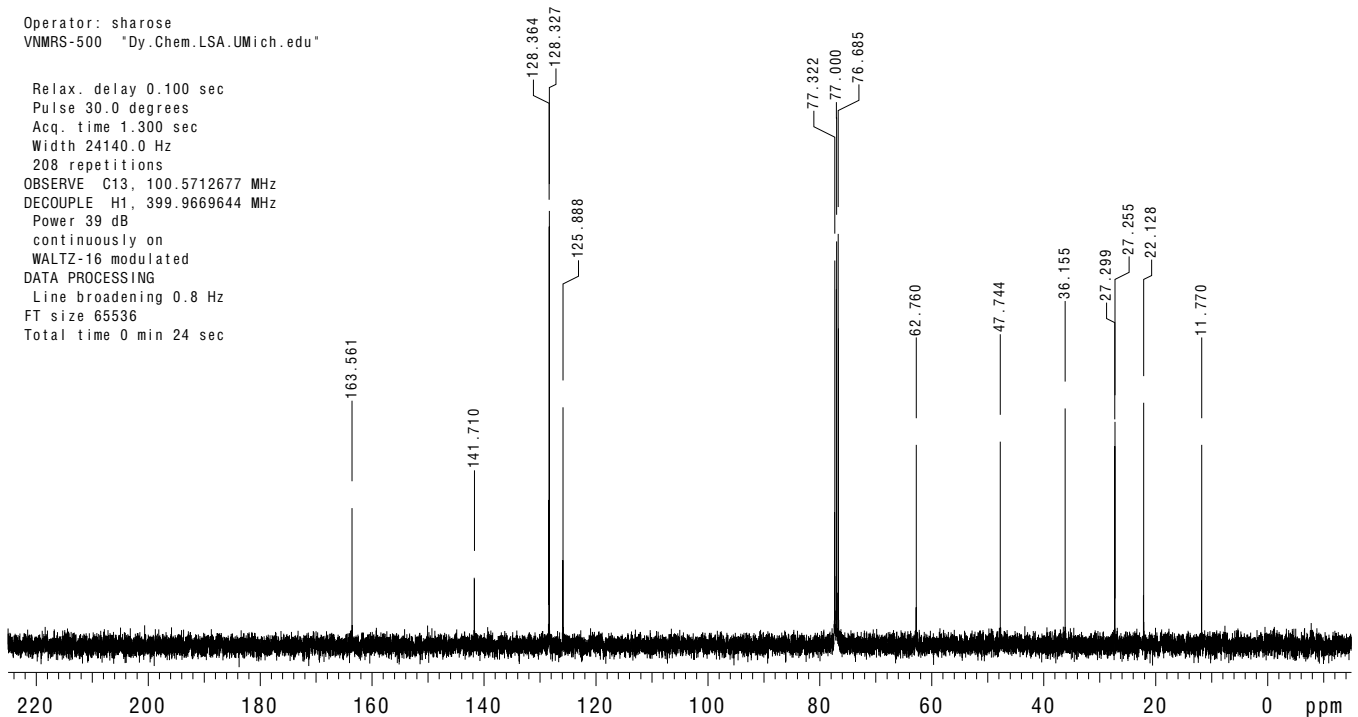



Archive directory:

Sample directory:

FidFile: Proton

Pulse Sequence: Proton (s2pul)  
Solvent: cdcl3  
Data collected on: Jul 19 2008

Operator: sharose  
VNMRS-500 "Dy.Chem.LSA.UMich.edu"

Relax. delay 0.500 sec  
Pulse 45.0 degrees  
Acq. time 3.000 sec  
Width 6399.5 Hz  
16 repetitions  
OBSERVE H1, 399.9649484 MHz  
DATA PROCESSING  
Line broadening 0.2 Hz  
FT size 65536  
Total time 0 min 24 sec

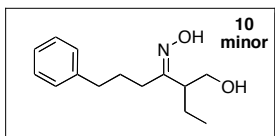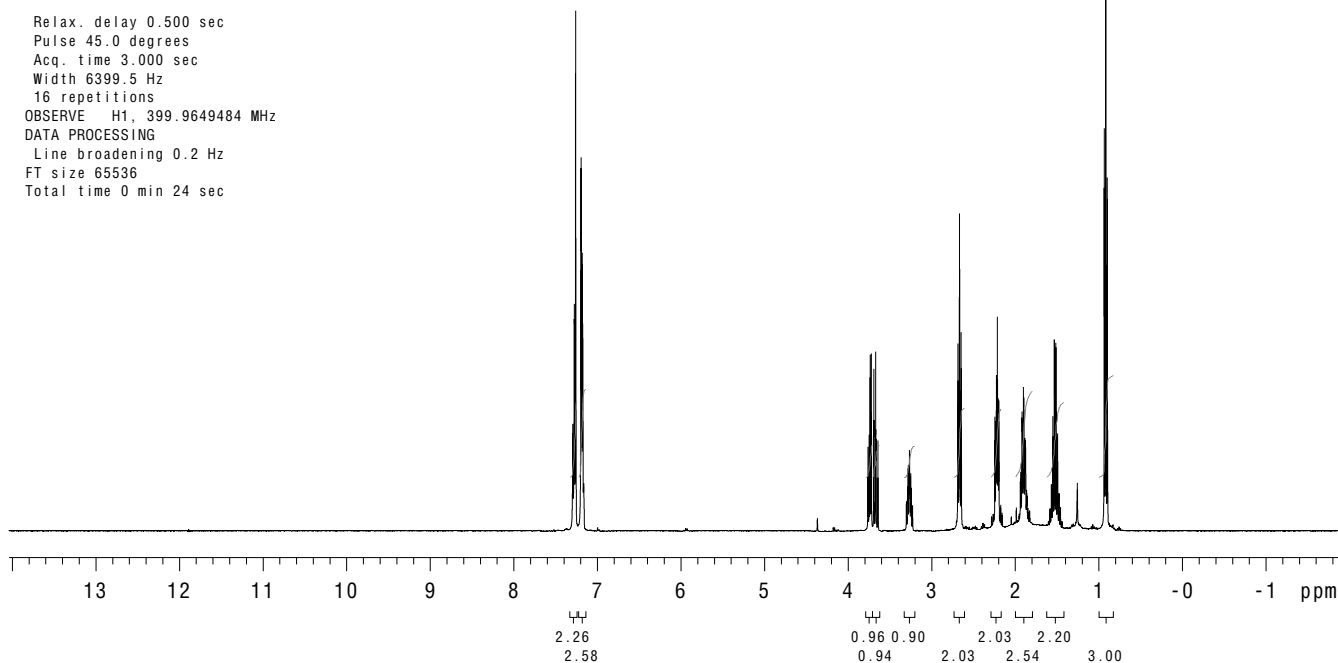

Sample directory:

FidFile: Carbon

Pulse Sequence: Carbon (s2pul)  
Solvent: cdcl3  
Data collected on: Jul 19 2008

Operator: sharose  
VNMRS-500 "Dy.Chem.LSA.UMich.edu"

Relax. delay 0.100 sec  
Pulse 30.0 degrees  
Acq. time 1.300 sec  
Width 24140.0 Hz  
544 repetitions  
OBSERVE C13, 100.5712670 MHz  
DECOUPLE H1, 399.9669644 MHz  
Power 39 dB  
continuously on  
WALTZ-16 modulated  
DATA PROCESSING  
Line broadening 0.8 Hz  
FT size 65536  
Total time 0 min 24 sec

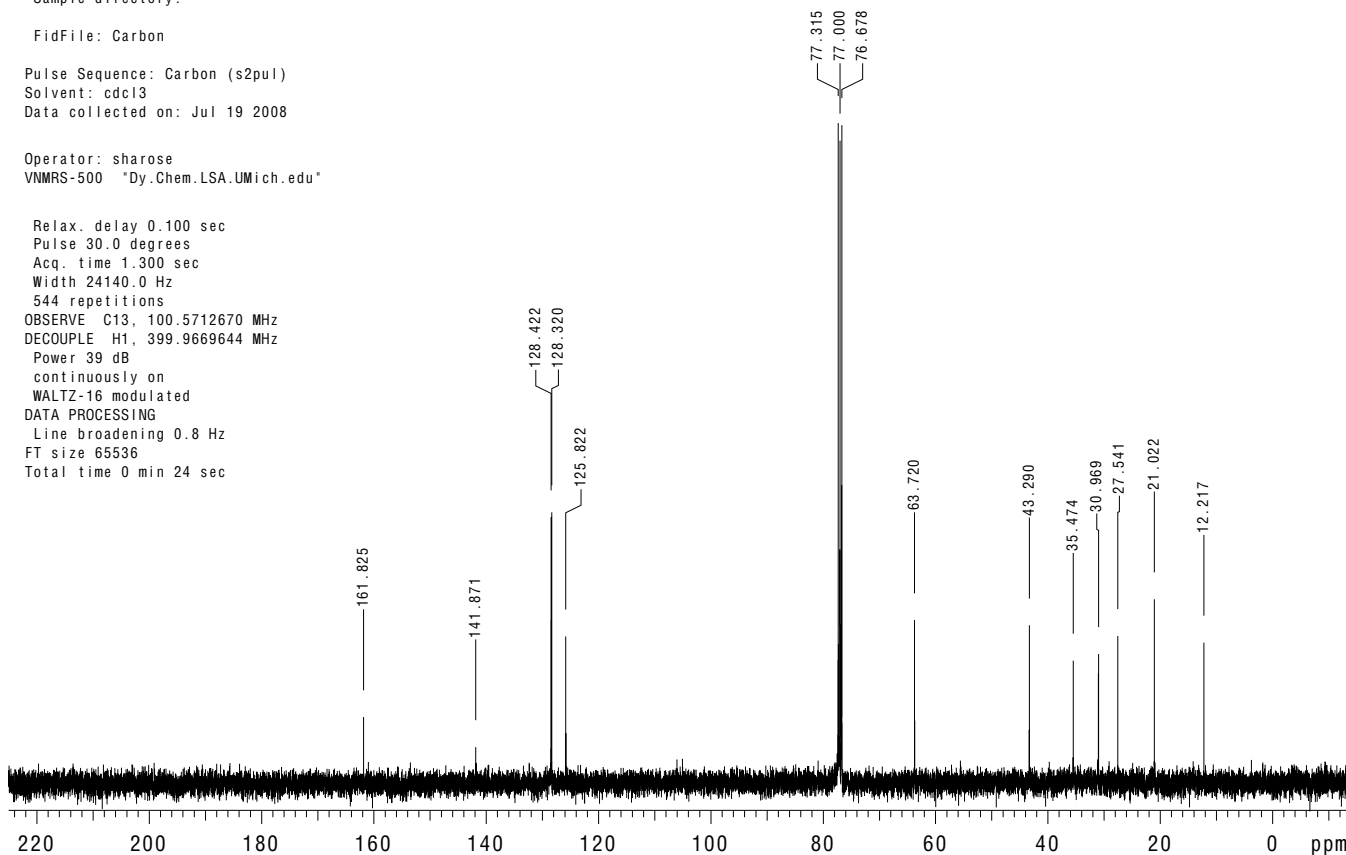

Data Collected on:  
Zr.Chem.LSA.UMich.edu-inova400  
Archive directory:

Sample directory:

FidFile: PROTON

Pulse Sequence: PROTON (s2pul)  
Solvent: cdcl3  
Data collected on: Aug 27 2009

Temp. 25.0 C / 298.1 K  
Operator: sharose

Relax. delay 0.500 sec  
Pulse 45.0 degrees  
Acq. time 3.500 sec  
Width 6399.5 Hz  
16 repetitions  
OBSERVE H1, 399.9649645 MHz  
DATA PROCESSING  
Line broadening 0.3 Hz  
FT size 65536  
Total time 1 min 12 sec

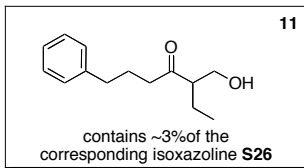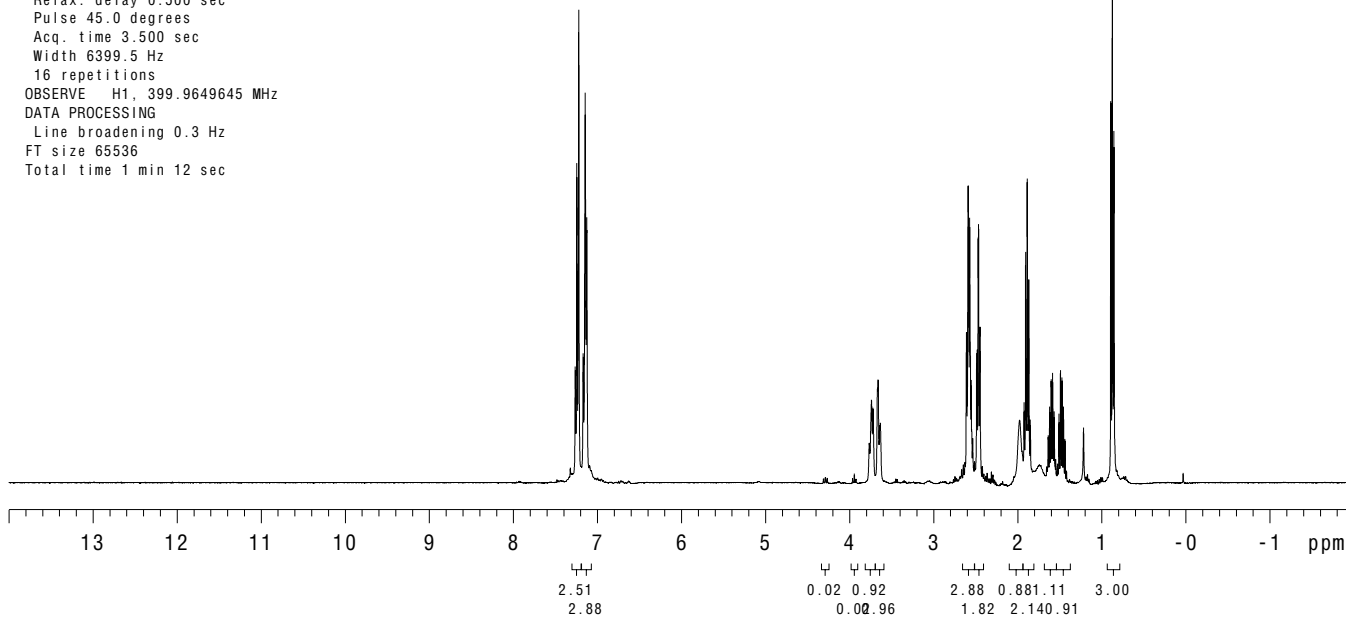

Sample directory:

FidFile: CARBON

Pulse Sequence: CARBON (s2pul)  
Solvent: cdcl3  
Data collected on: Jun 25 2009

Temp. 25.0 C / 298.1 K  
Operator: sharose

Relax. delay 0.100 sec  
Pulse 45.0 degrees  
Acq. time 2.607 sec  
Width 25141.4 Hz  
128 repetitions  
OBSERVE C13, 100.5712678 MHz  
DECOUPLE H1, 399.9669644 MHz  
Power 39 dB  
continuously on  
WALTZ-16 modulated  
DATA PROCESSING  
Line broadening 1.0 Hz  
FT size 131072  
Total time 1 hr, 30 min

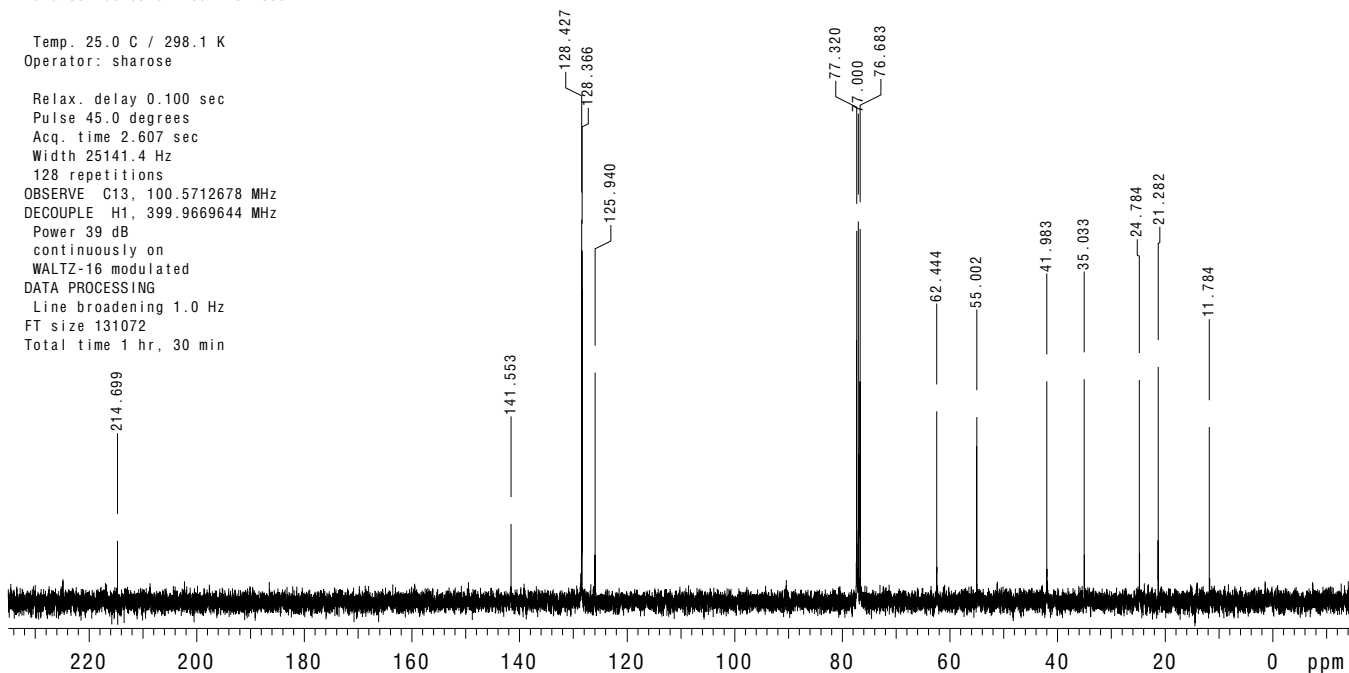

Data Collected on:  
Zr.Chem.LSA.UMich.edu-inova400  
Archive directory:

Sample directory:

FidFile: PROTON

Pulse Sequence: PROTON (s2pul)  
Solvent: cdcl3  
Data collected on: Aug 31 2009

Operator: sharose

Relax. delay 0.500 sec  
Pulse 45.0 degrees  
Acq. time 3.500 sec  
Width 6399.5 Hz  
16 repetitions  
OBSERVE H1, 399.9649494 MHz  
DATA PROCESSING  
Line broadening 0.3 Hz  
FT size 65536  
Total time 1 min 12 sec

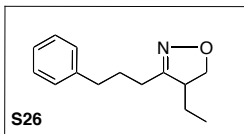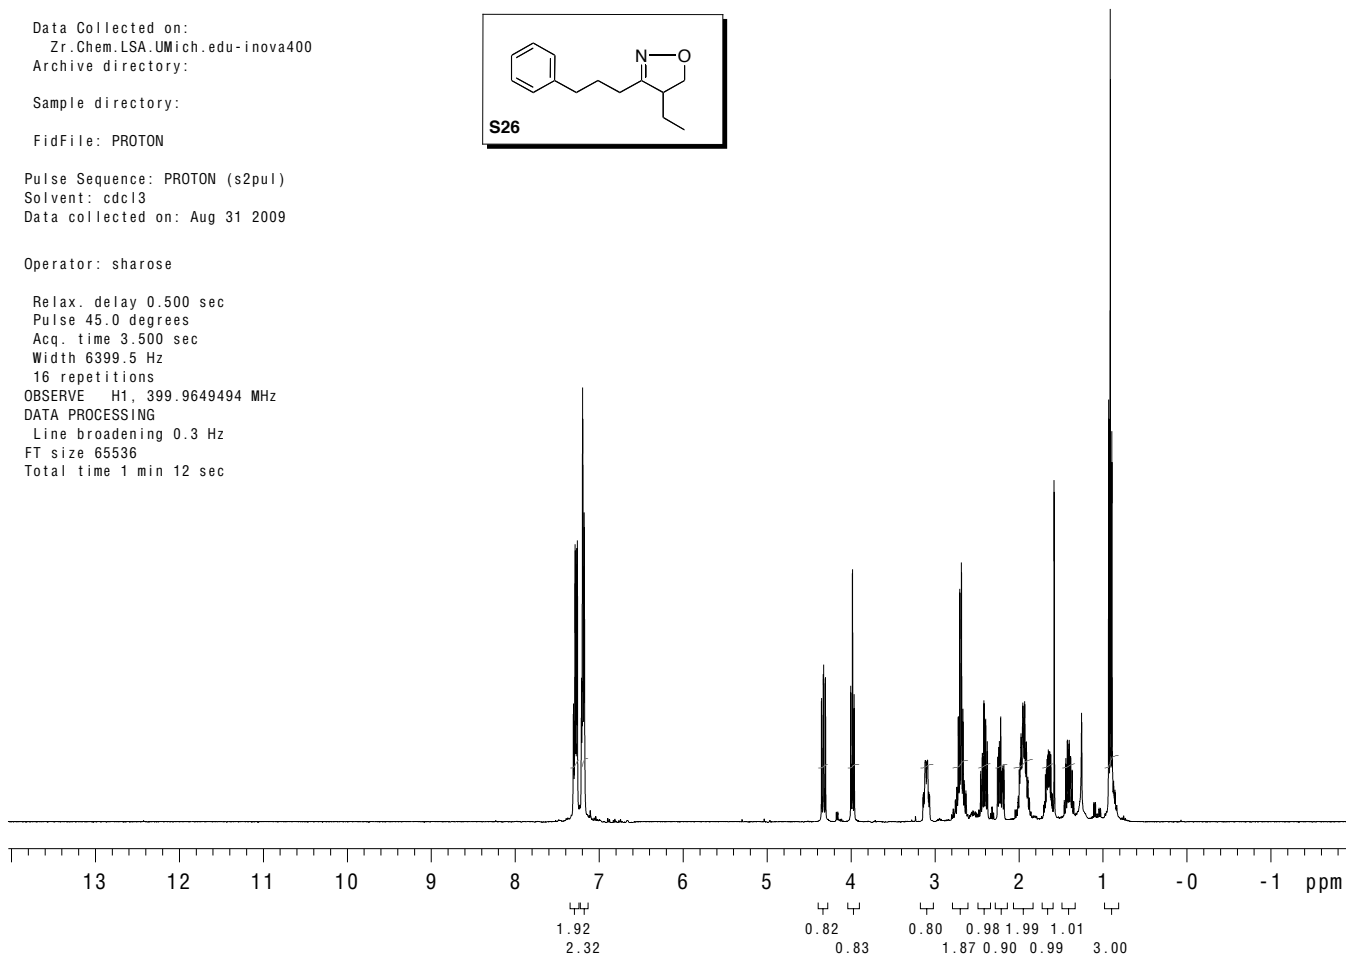

Sample directory:

FidFile: CARBON

Pulse Sequence: CARBON (s2pul)  
Solvent: cdcl3  
Data collected on: Aug 31 2009

Operator: sharose

Relax. delay 0.100 sec  
Pulse 45.0 degrees  
Acq. time 2.569 sec  
Width 25510.2 Hz  
176 repetitions  
OBSERVE C13, 100.7109781 MHz  
DECOUPLE H1, 400.5225704 MHz  
Power 41 dB  
continuously on  
WALTZ-16 modulated  
DATA PROCESSING  
Line broadening 1.0 Hz  
FT size 131072  
Total time 44 min

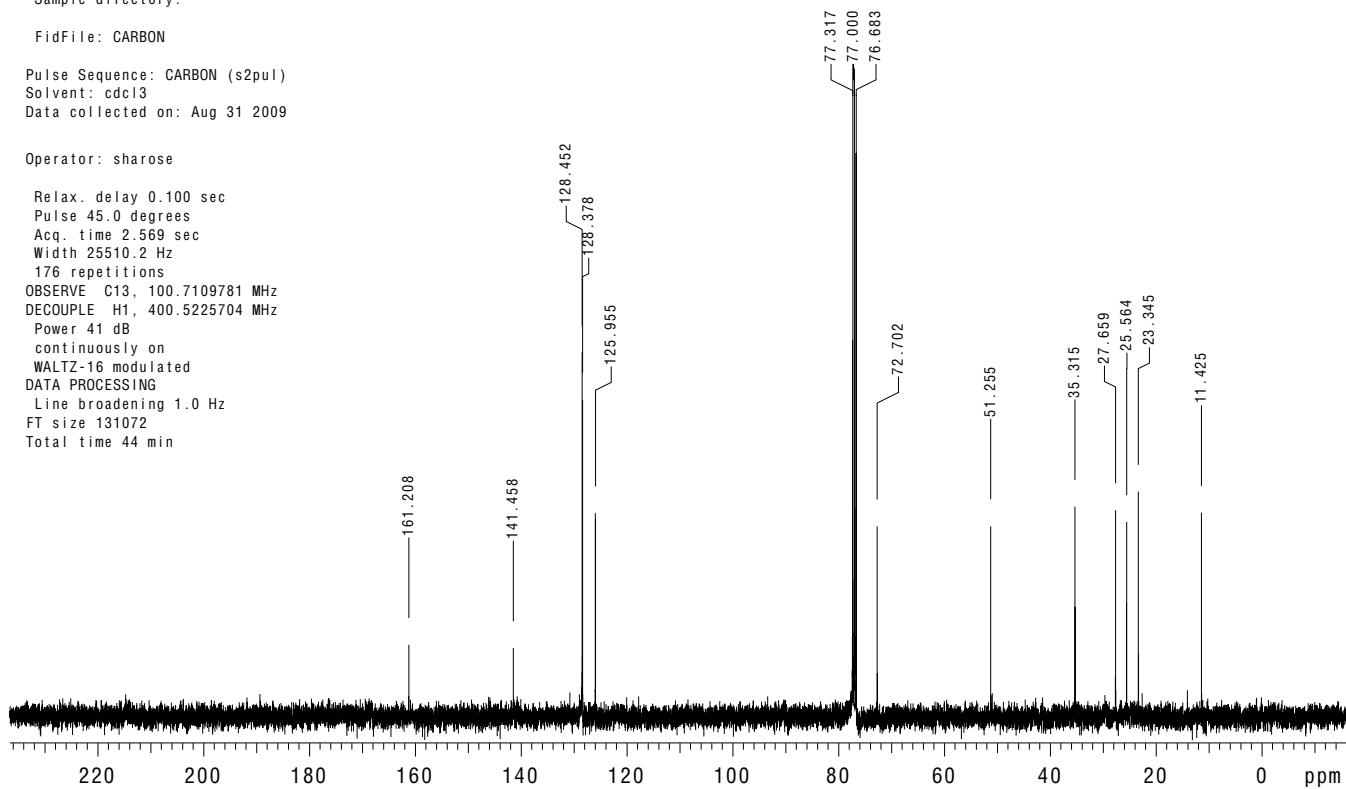

Data Collected on:  
Sn.Chem.LSA.UMich.edu-inova500  
Archive directory:

Sample directory:

FidFile: PROTON

Pulse Sequence: PROTON (s2pul)  
Solvent: cdcl3  
Data collected on: Nov 7 2009

Operator: sharose

Relax. delay 0.500 sec  
Pulse 45.0 degrees  
Acq. time 3.500 sec  
Width 7998.4 Hz  
16 repetitions  
OBSERVE H1, 499.9042606 MHz  
DATA PROCESSING  
Line broadening 0.3 Hz  
FT size 65536  
Total time 1 min 12 sec

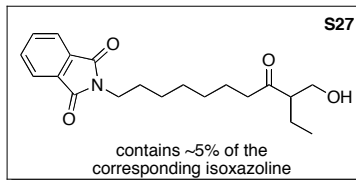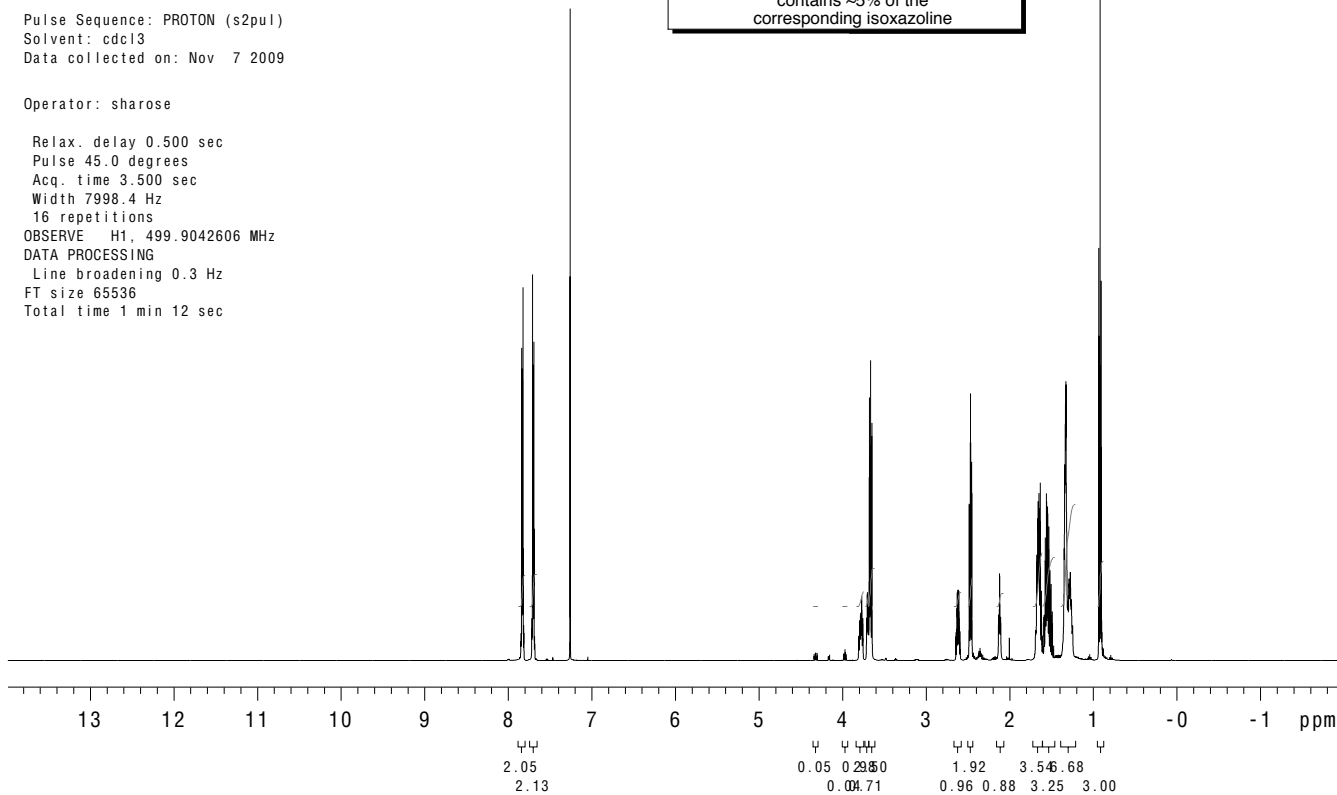

Sample directory:

FidFile: CARBON

Pulse Sequence: CARBON (s2pul)  
Solvent: cdcl3  
Data collected on: Aug 10 2009

Operator: sharose

Relax. delay 0.100 sec  
Pulse 45.0 degrees  
Acq. time 2.569 sec  
Width 25510.2 Hz  
128 repetitions  
OBSERVE C13, 100.7109773 MHz  
DECOUPLE H1, 400.5225704 MHz  
Power 41 dB  
continuously on  
WALTZ-16 modulated  
DATA PROCESSING  
Line broadening 1.0 Hz  
FT size 131072  
Total time 11 min

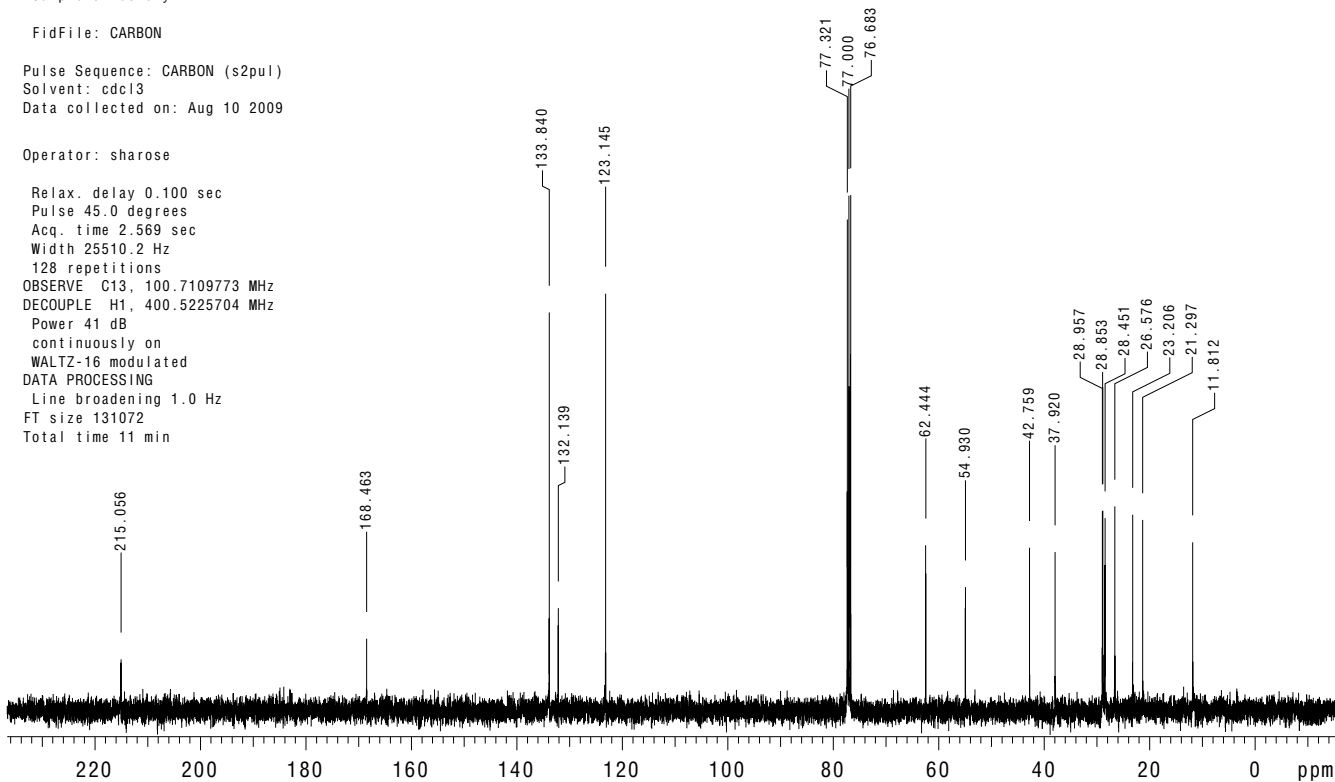

Data Collected on:  
Sn.Chem.LSA.UMich.edu-inova500  
Archive directory:

Sample directory:

FidFile: PROTON

Pulse Sequence: PROTON (s2pul)  
Solvent: cdcl3  
Data collected on: Nov 7 2009

Operator: sharose

Relax. delay 0.500 sec  
Pulse 45.0 degrees  
Acq. time 3.500 sec  
Width 7998.4 Hz  
16 repetitions  
OBSERVE H1, 499.9042606 MHz  
DATA PROCESSING  
Line broadening 0.3 Hz  
FT size 65536  
Total time 1 min 12 sec

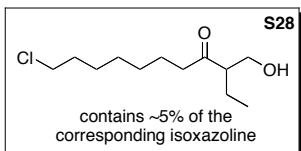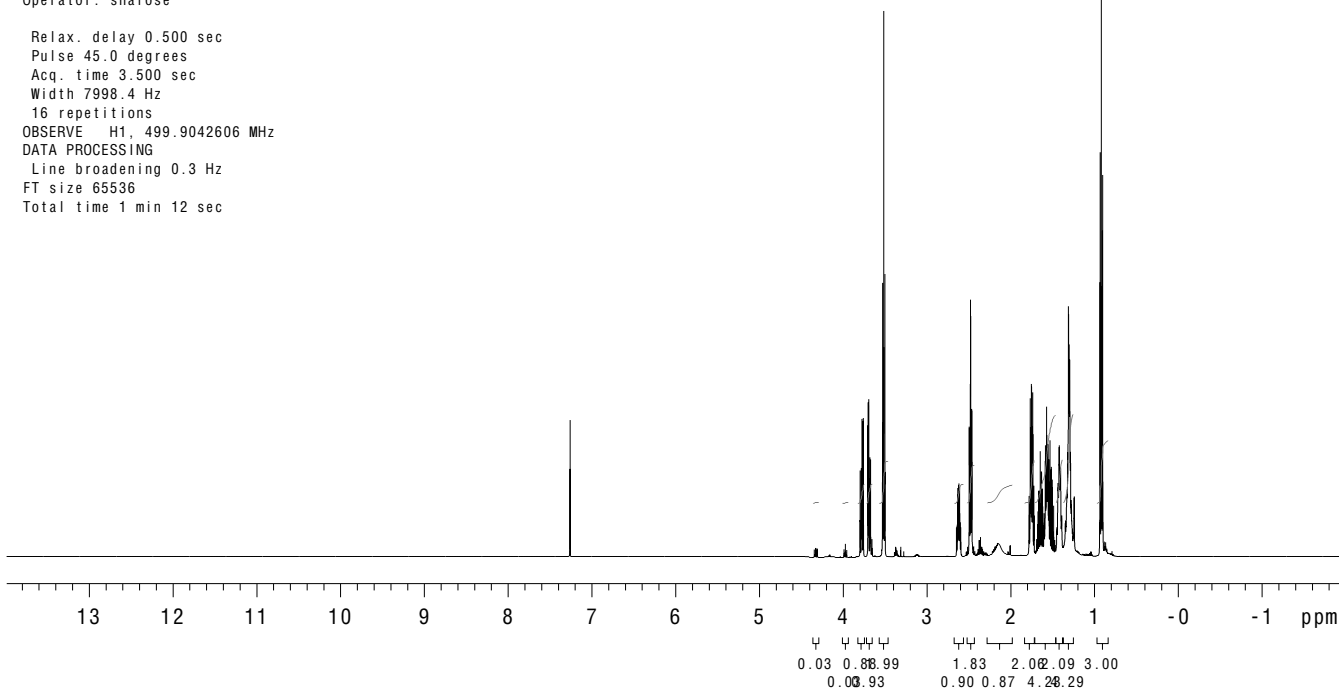

Data Collected on:  
Co.Chem.LSA.UMich.edu-vnmrs400  
Archive directory:

Sample directory:

FidFile: CARBON

Pulse Sequence: CARBON (s2pul)  
Solvent: cdcl3  
Data collected on: Aug 4 2009

Temp. 20.0 C / 293.1 K  
Operator: sharose

Relax. delay 0.100 sec  
Pulse 45.0 degrees  
Acq. time 2.569 sec  
Width 25510.2 Hz  
144 repetitions  
OBSERVE C13, 100.7109773 MHz  
DECOUPLE H1, 400.5225704 MHz  
Power 40 dB  
continuously on  
WALTZ-16 modulated  
DATA PROCESSING  
Line broadening 1.0 Hz  
FT size 131072  
Total time 44 min

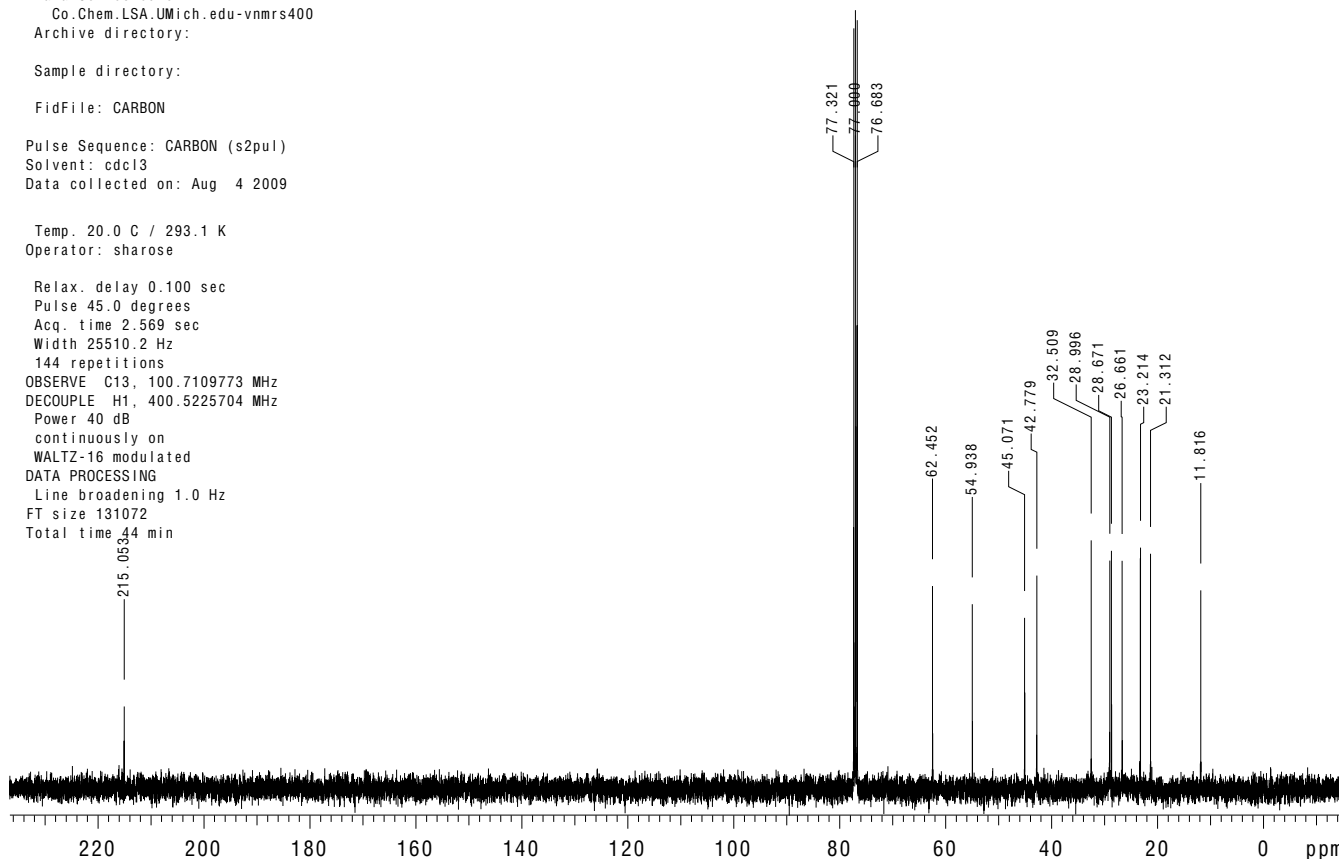

Data Collected on:  
Ga.Chem.LSA.UMich.edu-vnmrs400  
Archive directory:

Sample directory:

FidFile: PROTON

Pulse Sequence: PROTON (s2pul)  
Solvent: cdcl3  
Data collected on: Aug 13 2009

Temp. 25.0 C / 298.1 K  
Operator: sharose

Relax. delay 0.500 sec  
Pulse 45.0 degrees  
Acq. time 3.500 sec  
Width 6410.3 Hz  
16 repetitions  
OBSERVE H1, 399.5389259 MHz  
DATA PROCESSING  
Line broadening 0.3 Hz  
FT size 65536  
Total time 1 min 12 sec

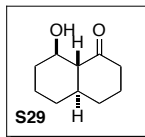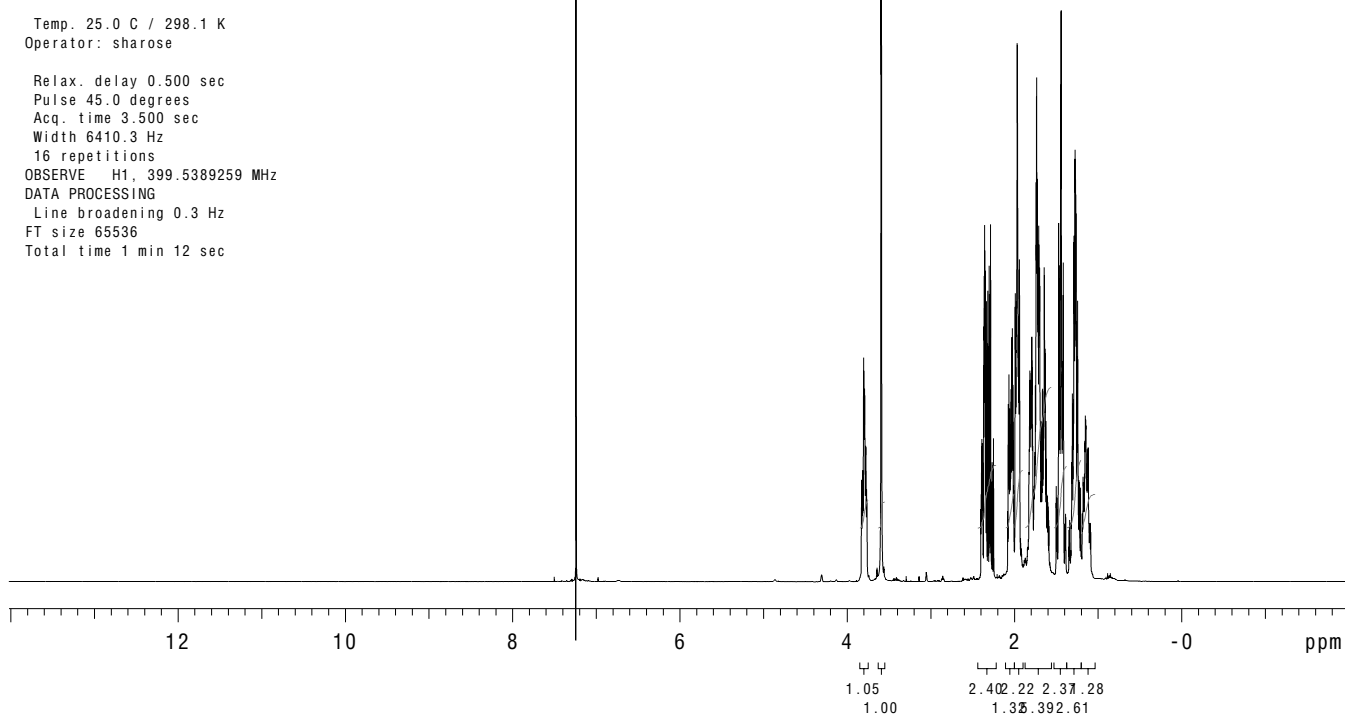

Data Collected on:  
Co.Chem.LSA.UMich.edu-vnmrs400  
Archive directory:

Sample directory:

FidFile: CARBON

Pulse Sequence: CARBON (s2pul)  
Solvent: cdcl3  
Data collected on: Aug 13 2009

Operator: sharose

Relax. delay 0.100 sec  
Pulse 45.0 degrees  
Acq. time 2.569 sec  
Width 25510.2 Hz  
64 repetitions  
OBSERVE C13, 100.7109781 MHz  
DECOUPLE H1, 400.5225704 MHz  
Power 41 dB  
continuously on  
WALTZ-16 modulated  
DATA PROCESSING  
Line broadening 1.0 Hz  
FT size 131072  
Total time 44 min

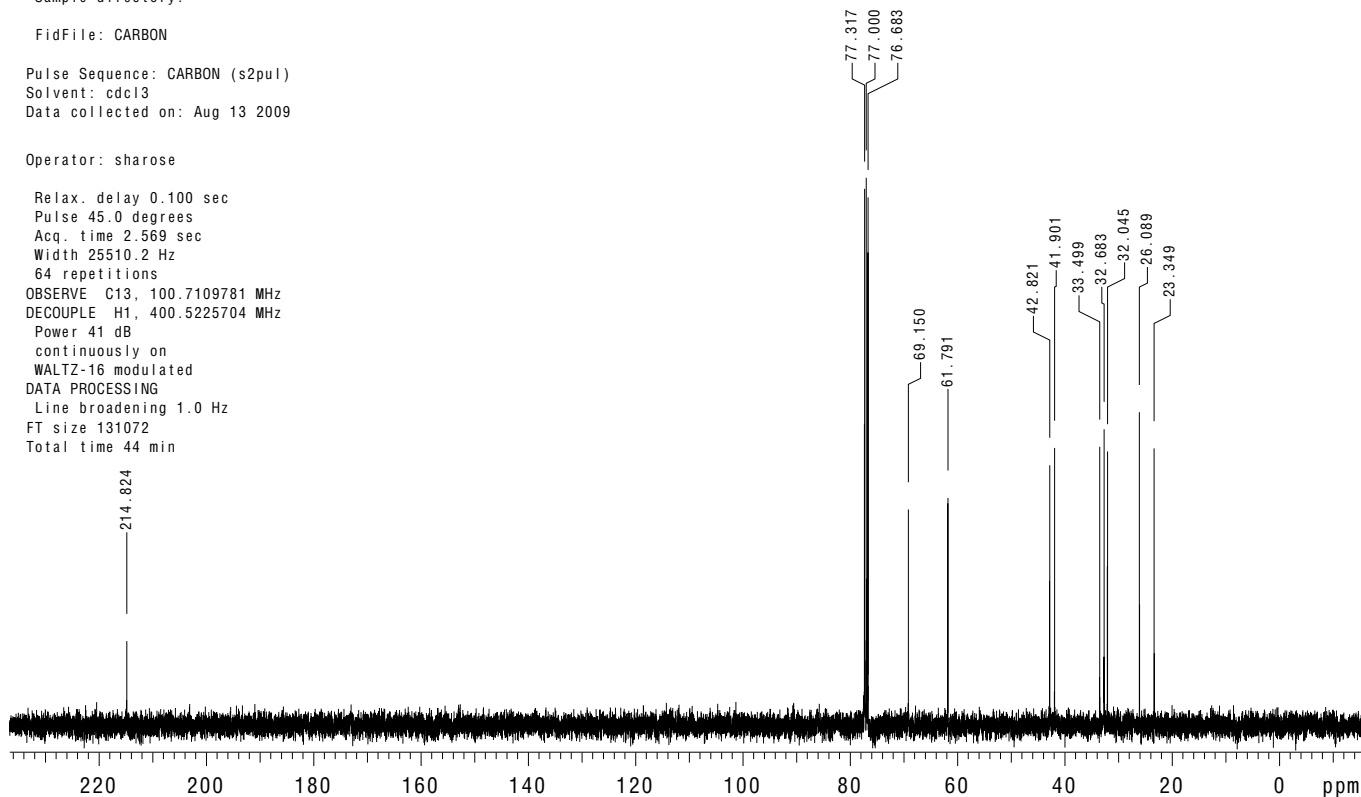

Data Collected on:  
Co.Chem.LSA.UMich.Edu-vnmrs400  
Archive directory:

Sample directory:

FidFile: PROTON

Pulse Sequence: PROTON (s2pul)  
Solvent: cdcl3  
Data collected on: Sep 15 2008

Operator: sharose

Relax. delay 1.000 sec  
Pulse 45.0 degrees  
Acq. time 2.556 sec  
Width 6410.3 Hz  
16 repetitions  
OBSERVE H1, 400.5297582 MHz  
DATA PROCESSING  
FT size 32768  
Total time 1 min 5 sec

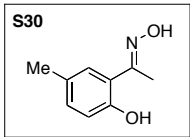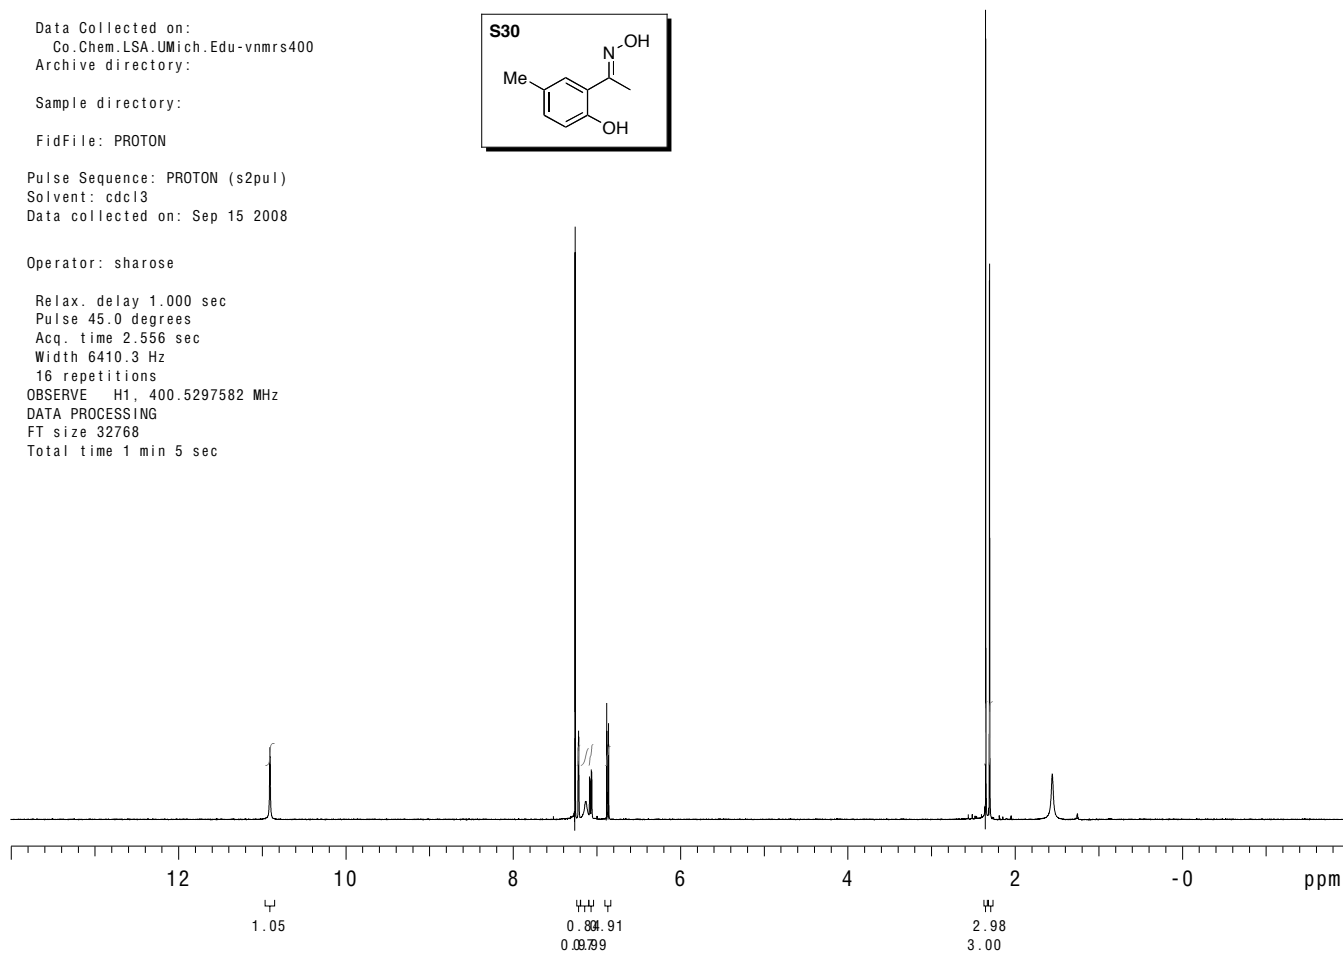

Data Collected on:  
Co.Chem.LSA.UMich.Edu-vnmrs400  
Archive directory:

Sample directory:

FidFile: CARBON

Pulse Sequence: CARBON (s2pul)  
Solvent: cdcl3  
Data collected on: Sep 15 2008

Operator: sharose

Relax. delay 1.000 sec  
Pulse 45.0 degrees  
Acq. time 1.285 sec  
Width 25510.2 Hz  
272 repetitions  
OBSERVE C13, 100.7132880 MHz  
DECOUPLE H1, 400.5317616 MHz  
Power 40 dB  
continuously on  
WALTZ-16 modulated  
DATA PROCESSING  
Line broadening 0.5 Hz  
FT size 65536  
Total time 1 hr, 16 min

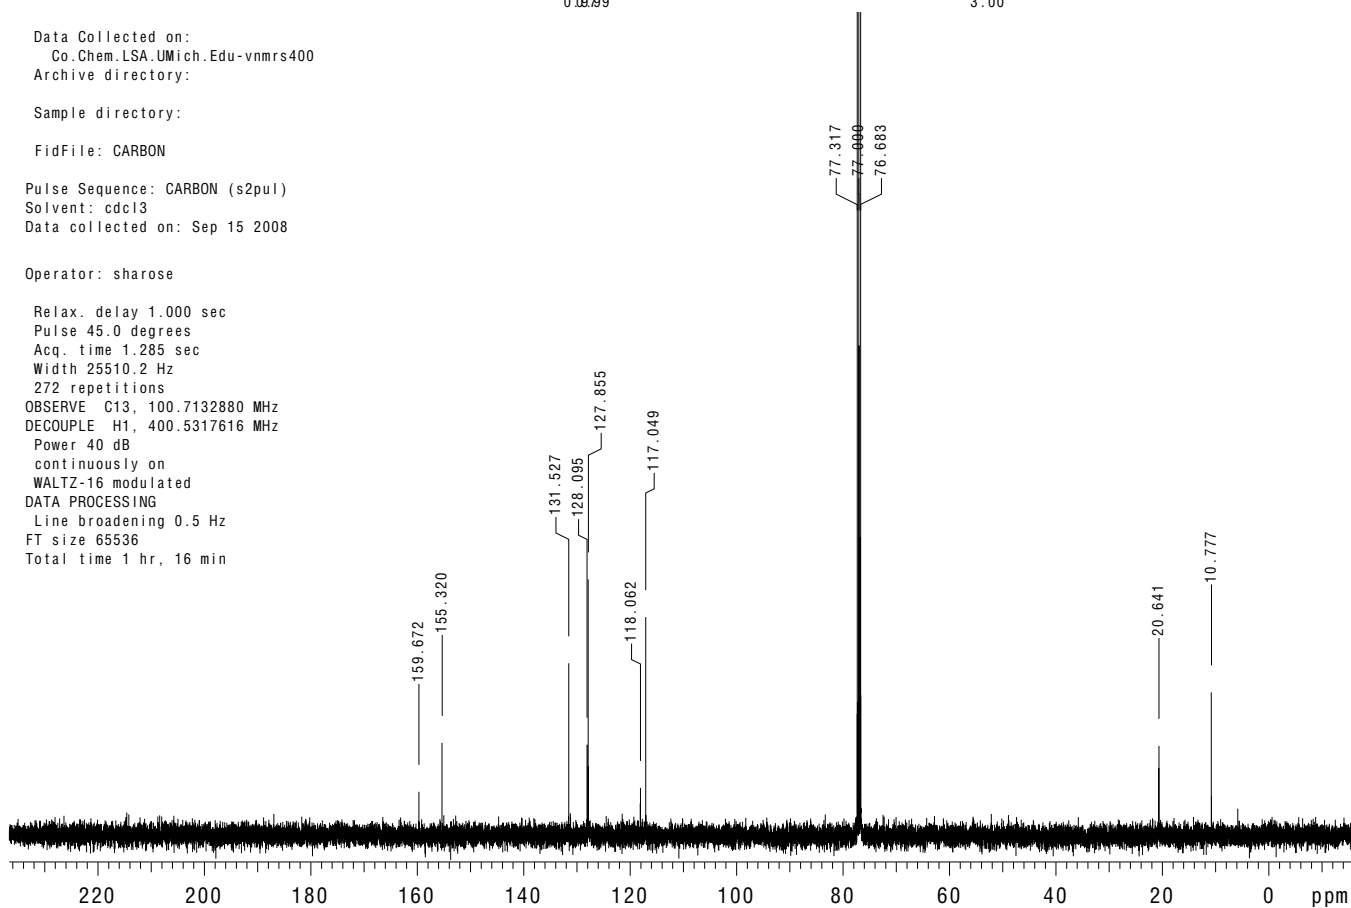

Data Collected on:  
Co.Chem.LSA.UMich.edu-vnmrs400  
Archive directory:

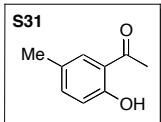

Sample directory:

FidFile: PROTON

Pulse Sequence: PROTON (s2pul)  
Solvent: cdcl3  
Data collected on: Nov 10 2009

Temp. 25.0 C / 298.1 K  
Operator: sharose

Relax. delay 0.500 sec  
Pulse 45.0 degrees  
Acq. time 3.500 sec  
Width 6410.3 Hz  
16 repetitions  
OBSERVE H1, 400.5205667 MHz  
DATA PROCESSING  
Line broadening 0.3 Hz  
FT size 65536  
Total time 1 min 12 sec

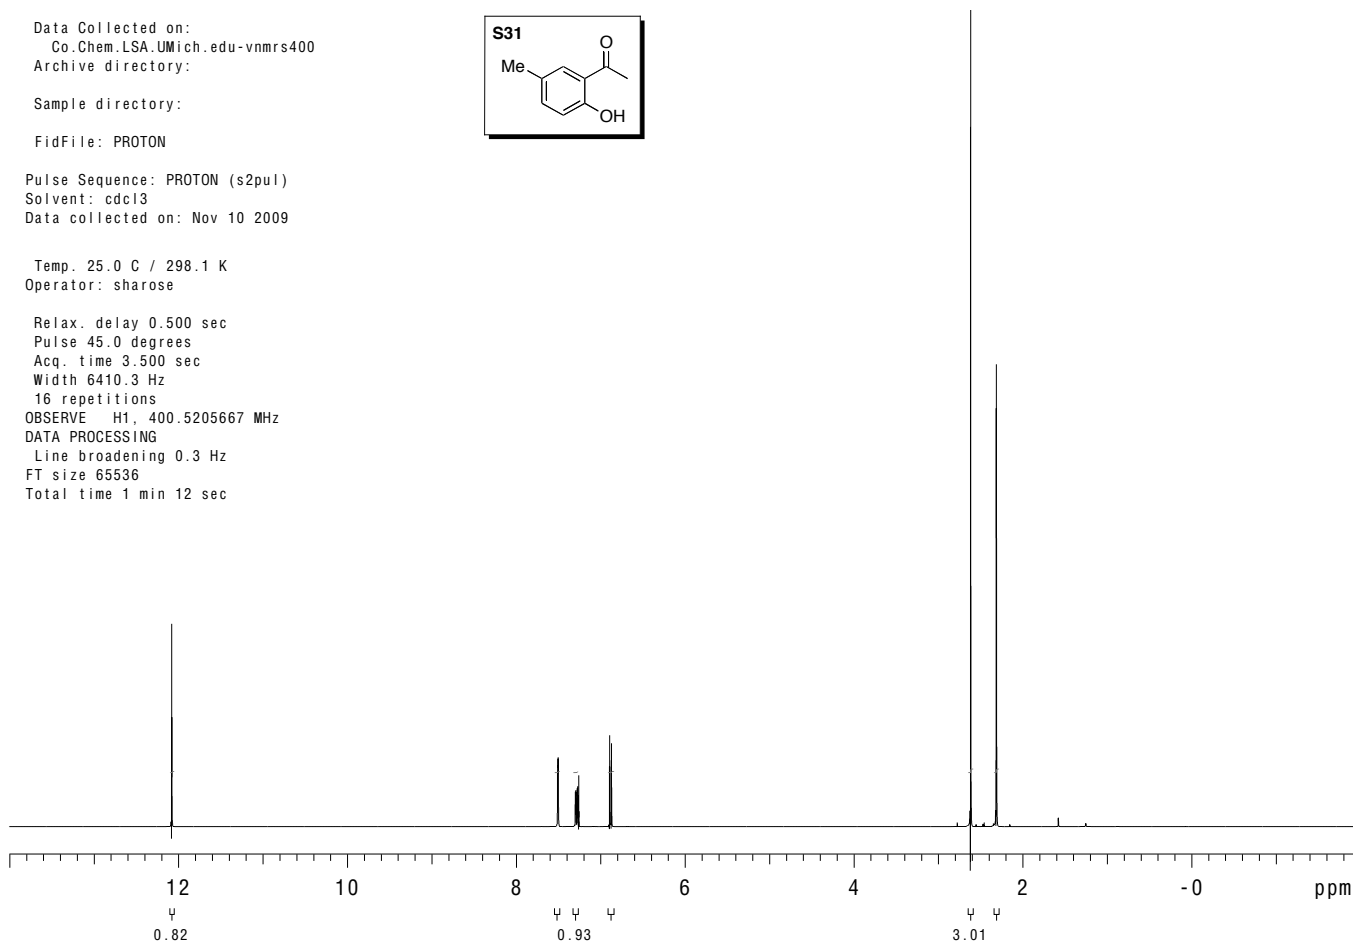

Sample Name:

Data Collected on:  
Co.Chem.LSA.UMich.edu-vnmrs400  
Archive directory:

Sample directory:

FidFile: CARBON

Pulse Sequence: CARBON (s2pul)  
Solvent: cdcl3  
Data collected on: Nov 23 2009

Temp. 23.0 C / 296.1 K  
Operator: sharose

Relax. delay 0.100 sec  
Pulse 45.0 degrees  
Acq. time 2.569 sec  
Width 25510.2 Hz  
160 repetitions  
OBSERVE C13, 100.7109785 MHz  
DECOUPLE H1, 400.5225704 MHz  
Power 41 dB  
continuously on  
WALTZ-16 modulation  
DATA PROCESSING  
Line broadening 20.0 Hz  
FT size 131072  
Total time 22 min

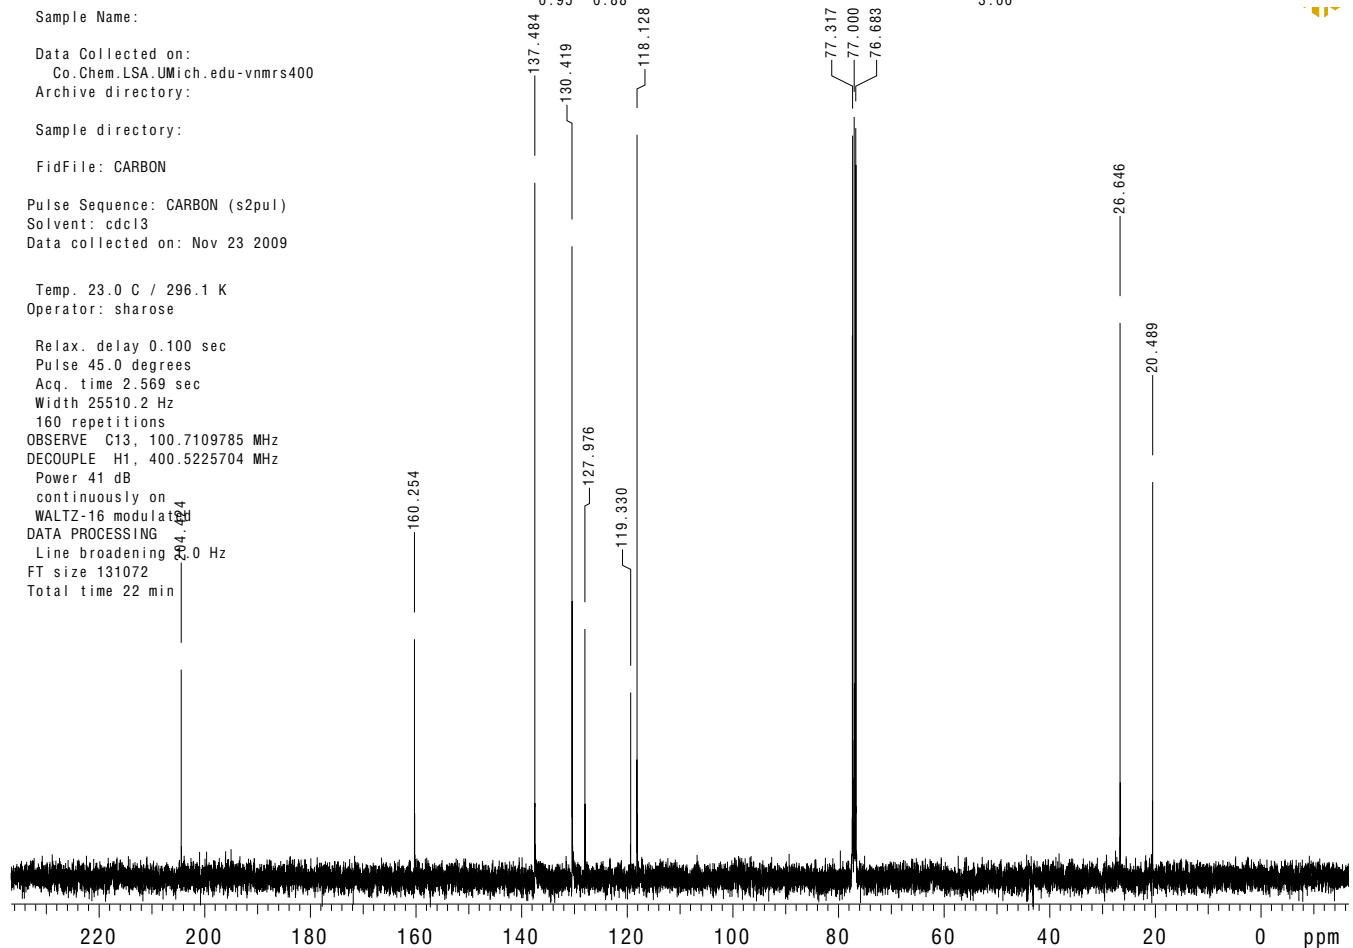



Data Collected on:  
Sn.Chem.LSA.UMich.edu-inova500  
Archive directory:

Sample directory:

FidFile: PROTON

Pulse Sequence: PROTON (s2pul)  
Solvent: CDCl3  
Data collected on: Sep 7 2009

Operator: sharose

Relax. delay 0.500 sec  
Pulse 45.0 degrees  
Acq. time 3.500 sec  
Width 7998.4 Hz  
16 repetitions  
OBSERVE H1, 499.9042606 MHz  
DATA PROCESSING  
Line broadening 0.3 Hz  
FT size 65536  
Total time 1 min 12 sec

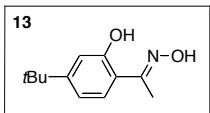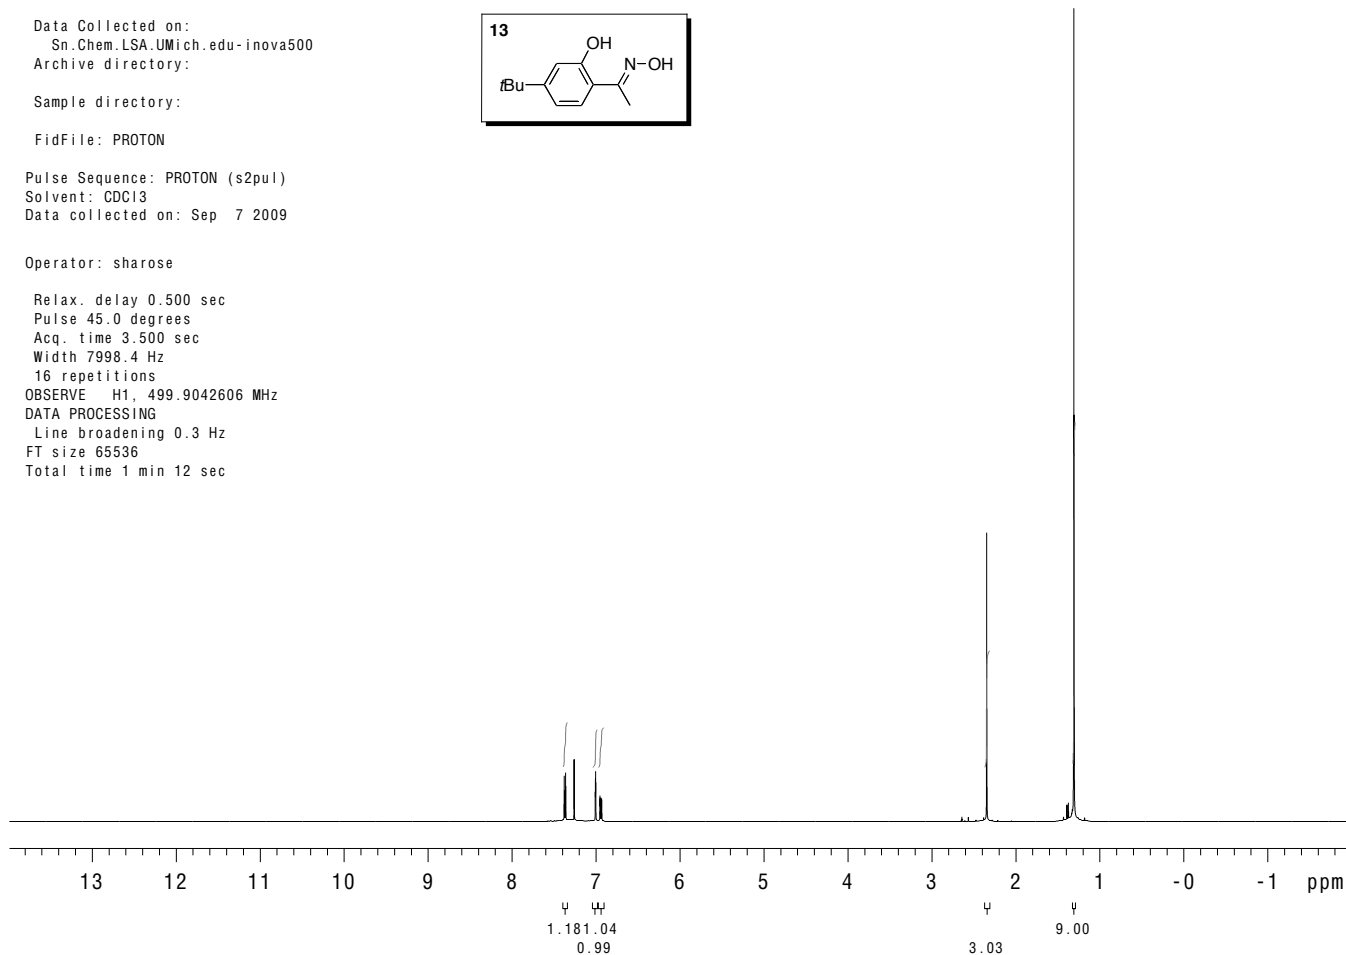

Data Collected on:  
Zr.Chem.LSA.UMich.edu-inova400  
Archive directory:

Sample directory:

FidFile: CARBON

Pulse Sequence: CARBON (s2pul)  
Solvent: cdcl3  
Data collected on: Oct 12 2009

Operator: sharose

Relax. delay 0.100 sec  
Pulse 45.0 degrees  
Acq. time 2.607 sec  
Width 25141.4 Hz  
176 repetitions  
OBSERVE C13, 100.5712681 MHz  
DECOUPLE H1, 399.9669644 MHz  
Power 39 dB  
continuously on  
WALTZ-16 modulated  
DATA PROCESSING  
Line broadening 1.0 Hz  
FT size 131072  
Total time 1 hr, 30 min

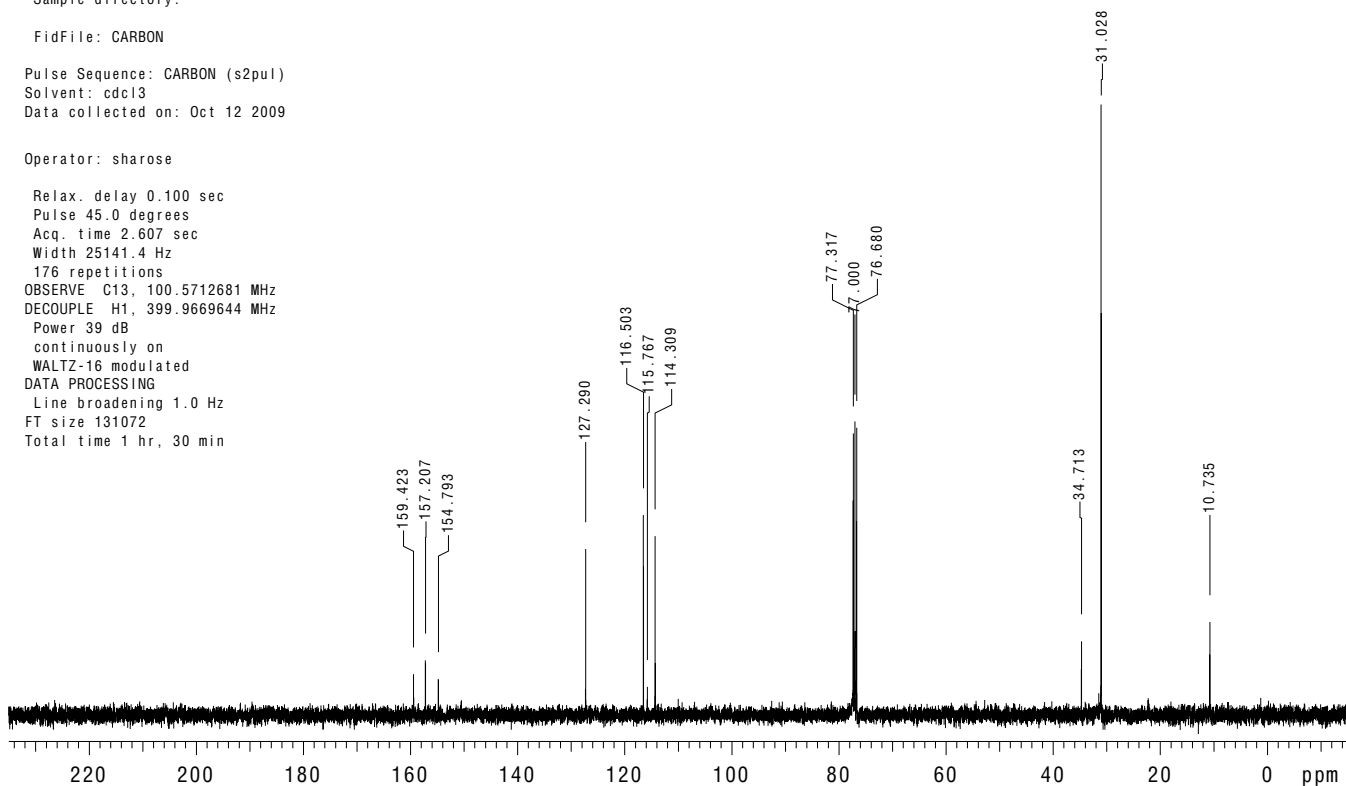

Data Collected on:  
Ga.Chem.LSA.UMich.edu-vnmrs400  
Archive directory:

Sample directory:

FidFile: PROTON

Pulse Sequence: PROTON (s2pul)  
Solvent: cdcl3  
Data collected on: May 6 2009

Operator: sharose

Relax. delay 1.000 sec  
Pulse 45.0 degrees  
Acq. time 2.556 sec  
Width 6410.3 Hz  
8 repetitions  
OBSERVE H1, 399.5389259 MHz  
DATA PROCESSING  
FT size 32768  
Total time 0 min 29 sec

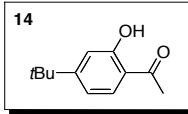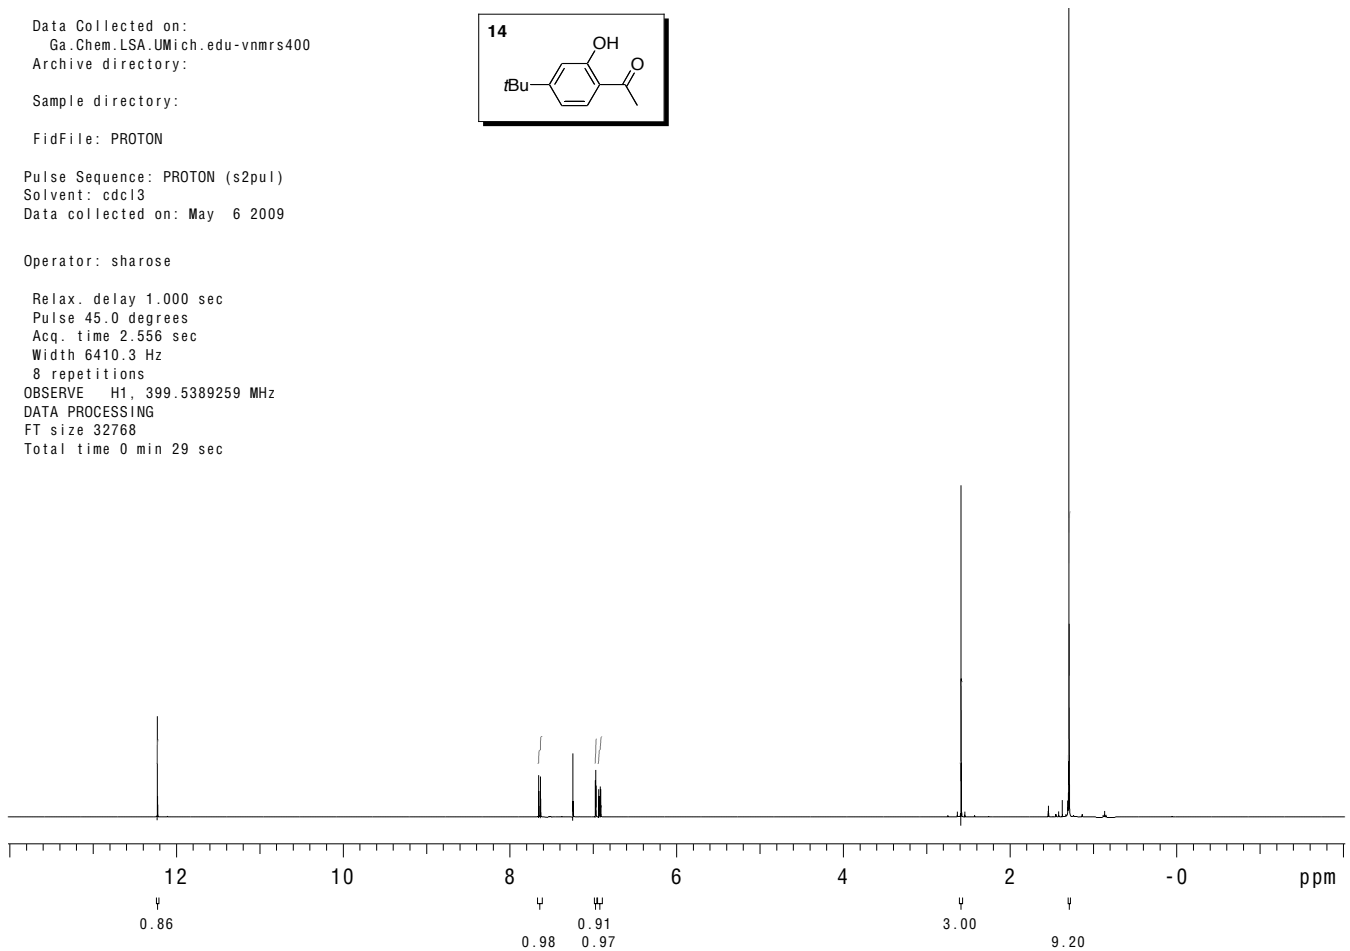

Data Collected on:  
Co.Chem.LSA.UMich.edu-vnmrs400  
Archive directory:

Sample directory:

FidFile: CARBON

Pulse Sequence: CARBON (s2pul)  
Solvent: cdcl3  
Data collected on: Oct 10 2009

Operator: sharose

Relax. delay 0.100 sec  
Pulse 45.0 degrees  
Acq. time 2.569 sec  
Width 25510.2 Hz  
64 repetitions  
OBSERVE C13, 100.7109777 MHz  
DECOUPLE H1, 400.5225704 MHz  
Power 41 dB  
continuously on  
WALTZ-16 modulated  
DATA PROCESSING  
Line broadening 1.0 Hz  
FT size 131072  
Total time 1 hr, 29 min

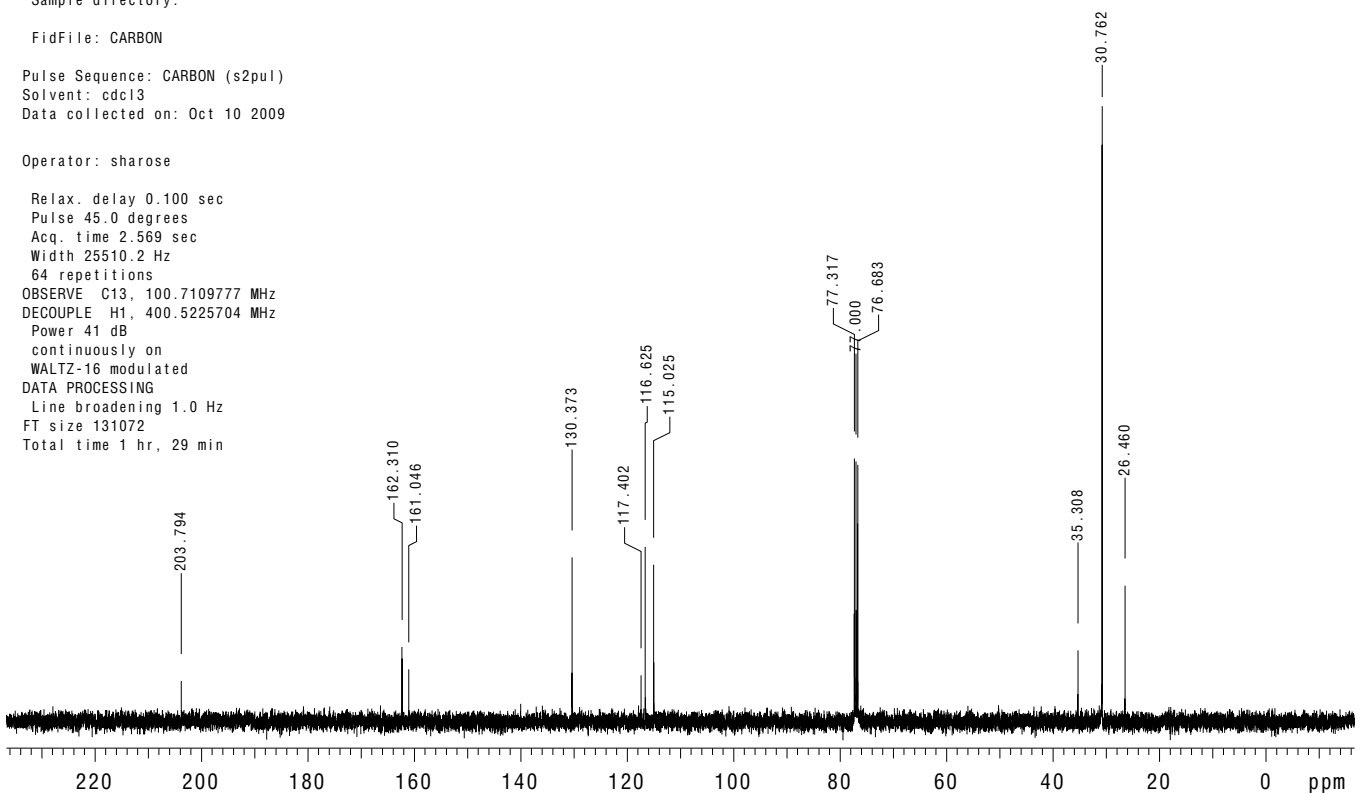

Data Collected on:  
Zr.Chem.LSA.UMich.edu-inova400  
Archive directory:

Sample directory:

FidFile: PROTON

Pulse Sequence: PROTON (s2pul)  
Solvent: cdcl3  
Data collected on: Nov 10 2009

Temp. 23.0 C / 296.1 K  
Operator: sharose

Relax. delay 0.500 sec  
Pulse 45.0 degrees  
Acq. time 3.500 sec  
Width 6399.5 Hz  
16 repetitions  
OBSERVE H1, 399.9649488 MHz  
DATA PROCESSING  
Line broadening 0.3 Hz  
FT size 65536  
Total time 1 min 12 sec

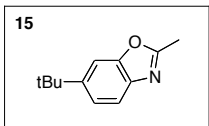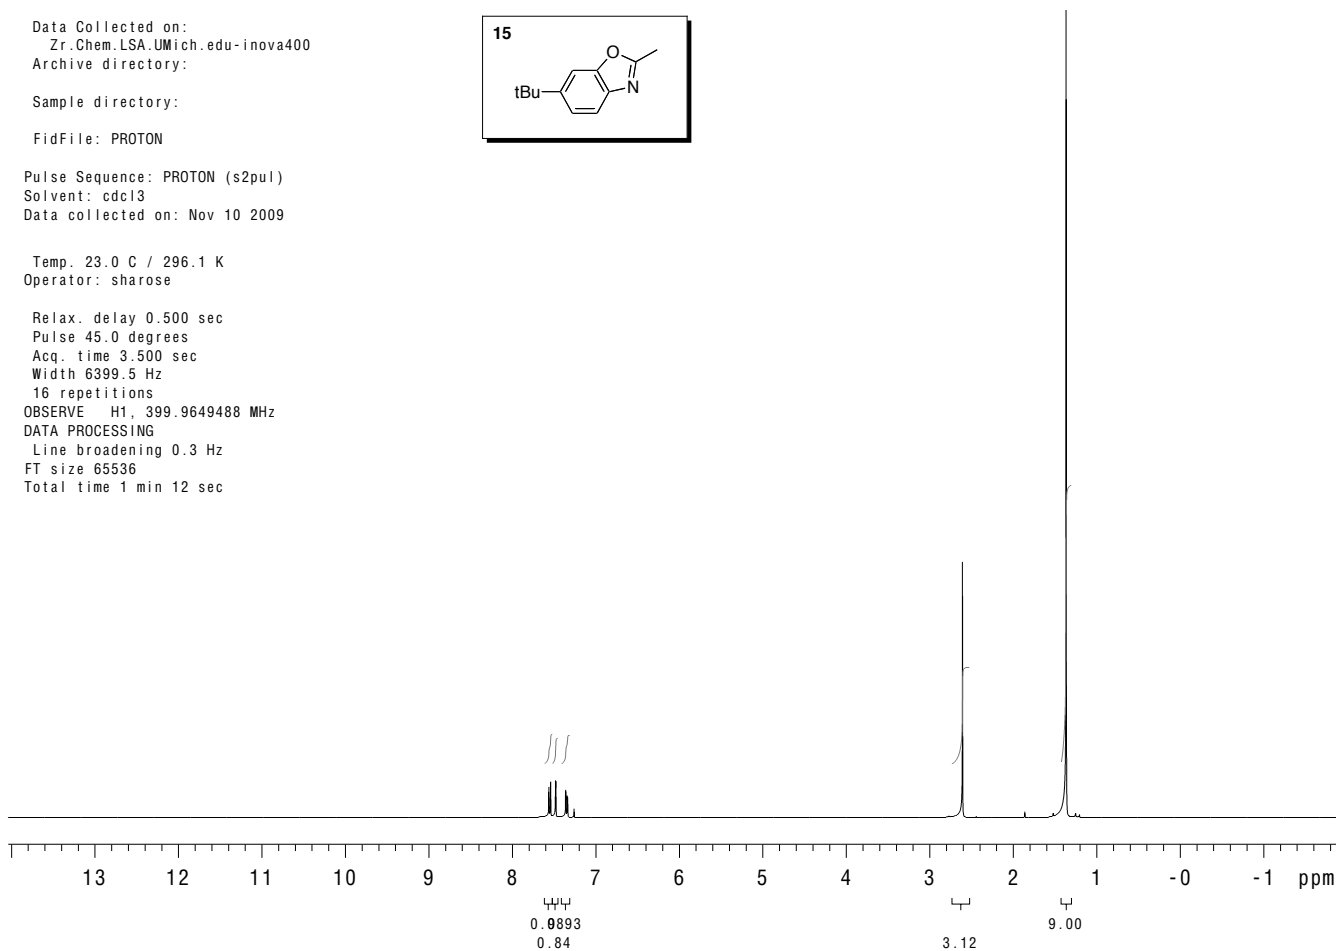

Data Collected on:  
Zr.Chem.LSA.UMich.edu-inova400  
Archive directory:

Sample directory:

FidFile: CARBON

Pulse Sequence: CARBON (s2pul)  
Solvent: cdcl3  
Data collected on: Nov 10 2009

Temp. 23.0 C / 296.1 K  
Operator: sharose

Relax. delay 0.100 sec  
Pulse 45.0 degrees  
Acq. time 2.607 sec  
Width 25141.4 Hz  
144 repetitions  
OBSERVE C13, 100.5712689 MHz  
DECOUPLE H1, 399.9669644 MHz  
Power 39 dB  
continuously on  
WALTZ-16 modulated  
DATA PROCESSING  
Line broadening 1.0 Hz  
FT size 131072  
Total time 11 min

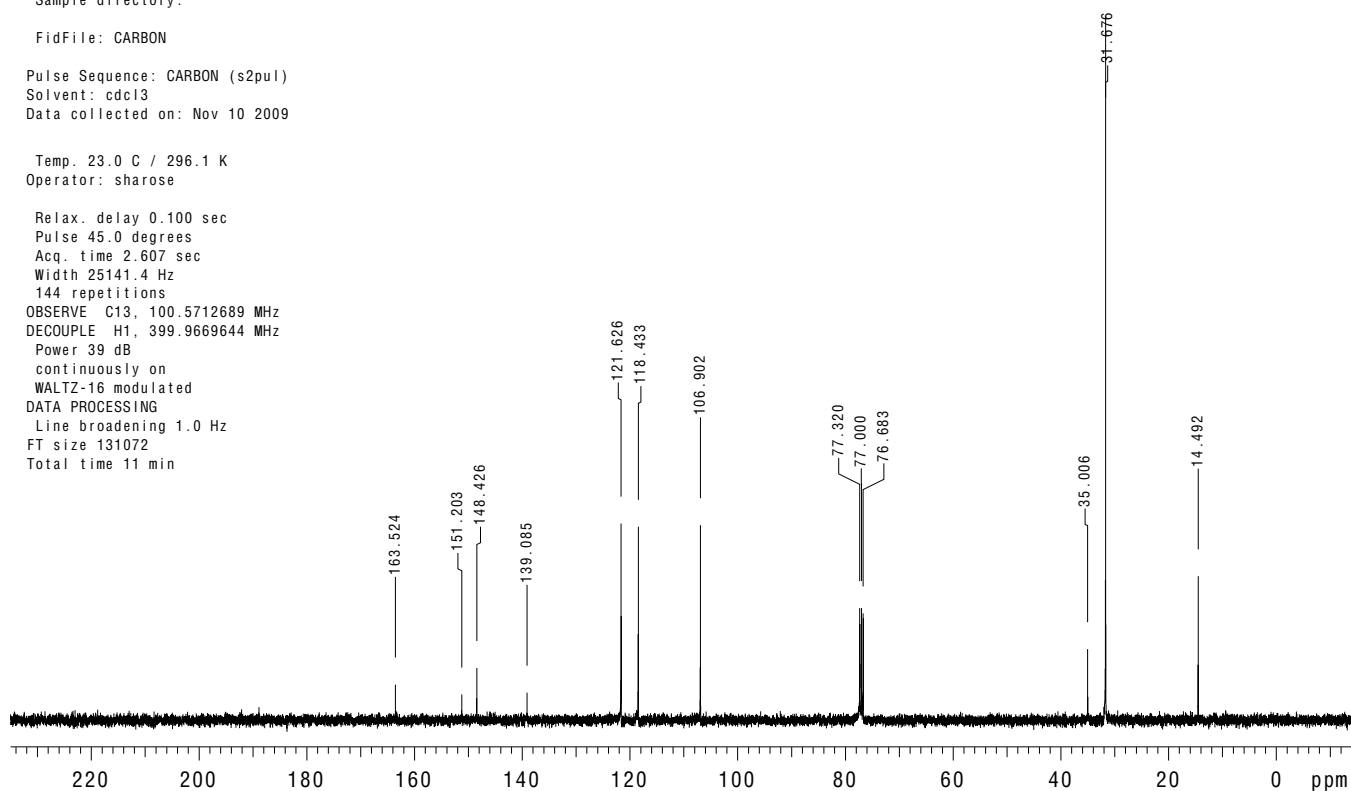

Data Collected on:  
Sn.Chem.LSA.UMich.edu-inova500  
Archive directory:

Sample directory:

FidFile: PROTON

Pulse Sequence: PROTON (s2pul)  
Solvent: cd3od  
Data collected on: Sep 30 2009

Operator: sharose

Relax. delay 0.500 sec  
Pulse 45.0 degrees  
Acq. time 3.500 sec  
Width 7998.4 Hz  
16 repetitions  
OBSERVE H1, 499.9062276 MHz  
DATA PROCESSING  
Line broadening 0.3 Hz  
FT size 65536  
Total time 1 min 12 sec

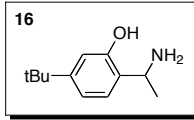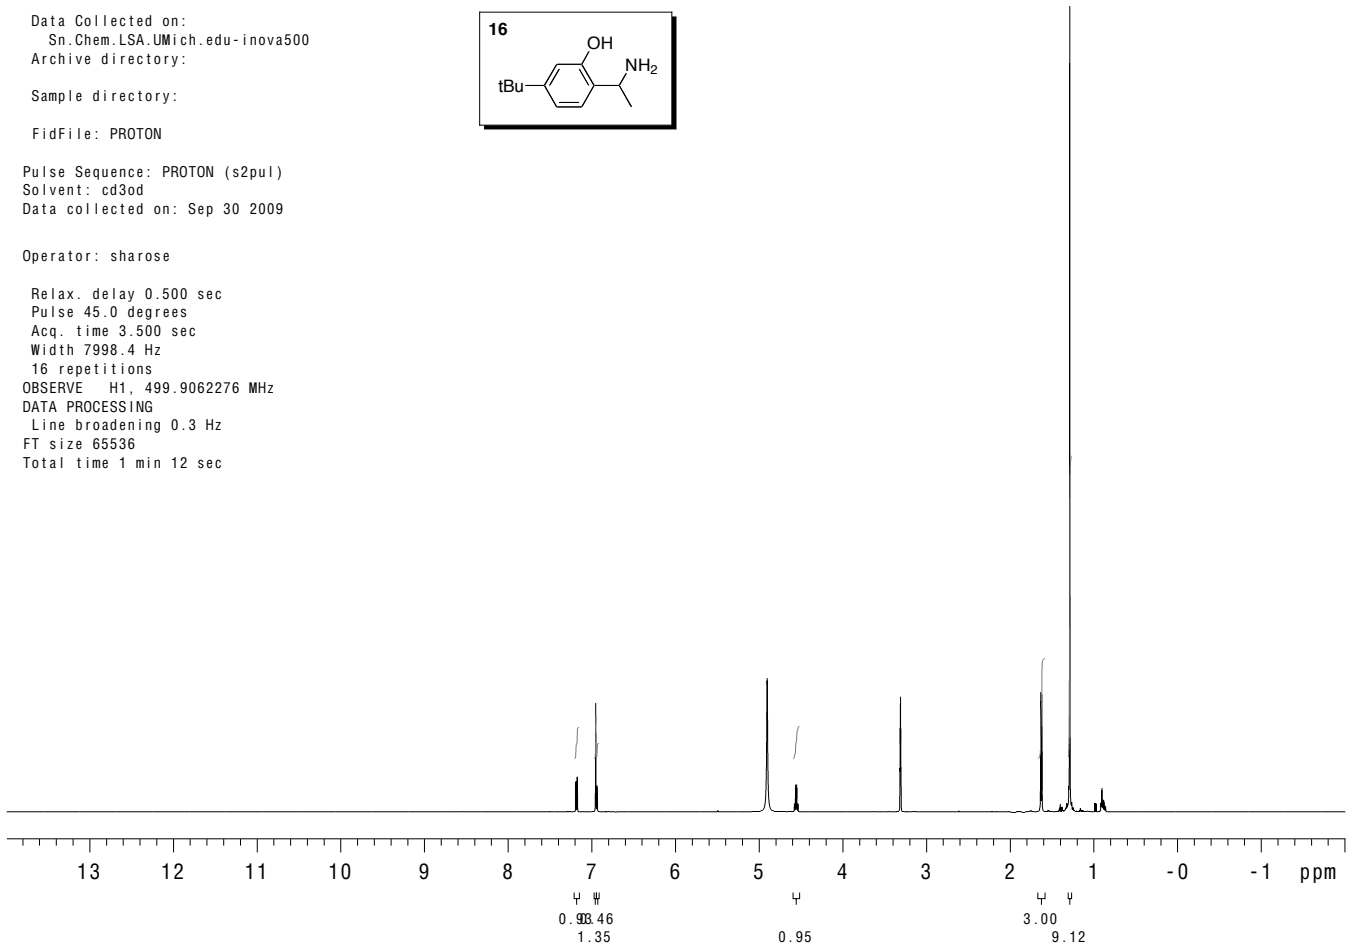

Data Collected on:  
Co.Chem.LSA.UMich.edu-vnmrs400  
Archive directory:

Sample directory:

FidFile: CARBON

Pulse Sequence: CARBON (s2pul)  
Solvent: cd3od  
Data collected on: Sep 30 2009

Temp. 10.0 C / 283.1 K  
Operator: sharose

Relax. delay 0.100 sec  
Pulse 45.0 degrees  
Acq. time 2.569 sec  
Width 25510.2 Hz  
256 repetitions  
OBSERVE C13, 100.7112298 MHz  
DECOUPLE H1, 400.5241485 MHz  
Power 41 dB  
continuously on  
WALTZ-16 modulated  
DATA PROCESSING  
Line broadening 1.0 Hz  
FT size 131072  
Total time 1 hr, 29 min

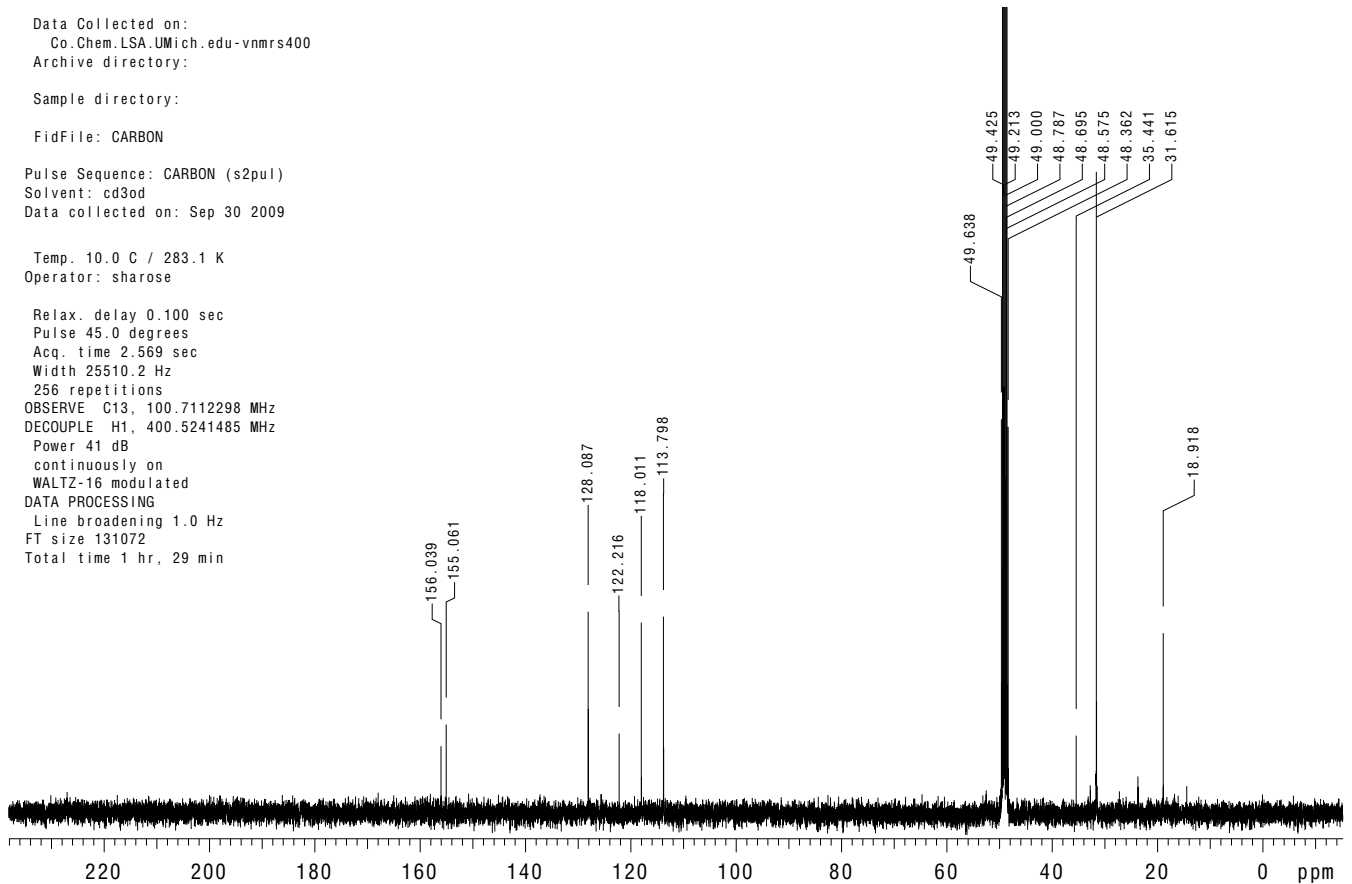

Data Collected on:  
Sn.Chem.LSA.UMich.edu-inova500  
Archive directory:

Sample directory:

FidFile: PROTON

Pulse Sequence: PROTON (s2pul)  
Solvent: cd3od  
Data collected on: Sep 12 2009

Operator: sharose

Relax. delay 0.500 sec  
Pulse 45.1 degrees  
Acq. time 3.500 sec  
Width 7998.4 Hz  
16 repetitions  
OBSERVE H1, 499.9062233 MHz  
DATA PROCESSING  
Line broadening 0.3 Hz  
FT size 65536  
Total time 1 min 12 sec

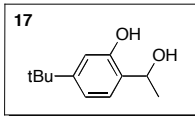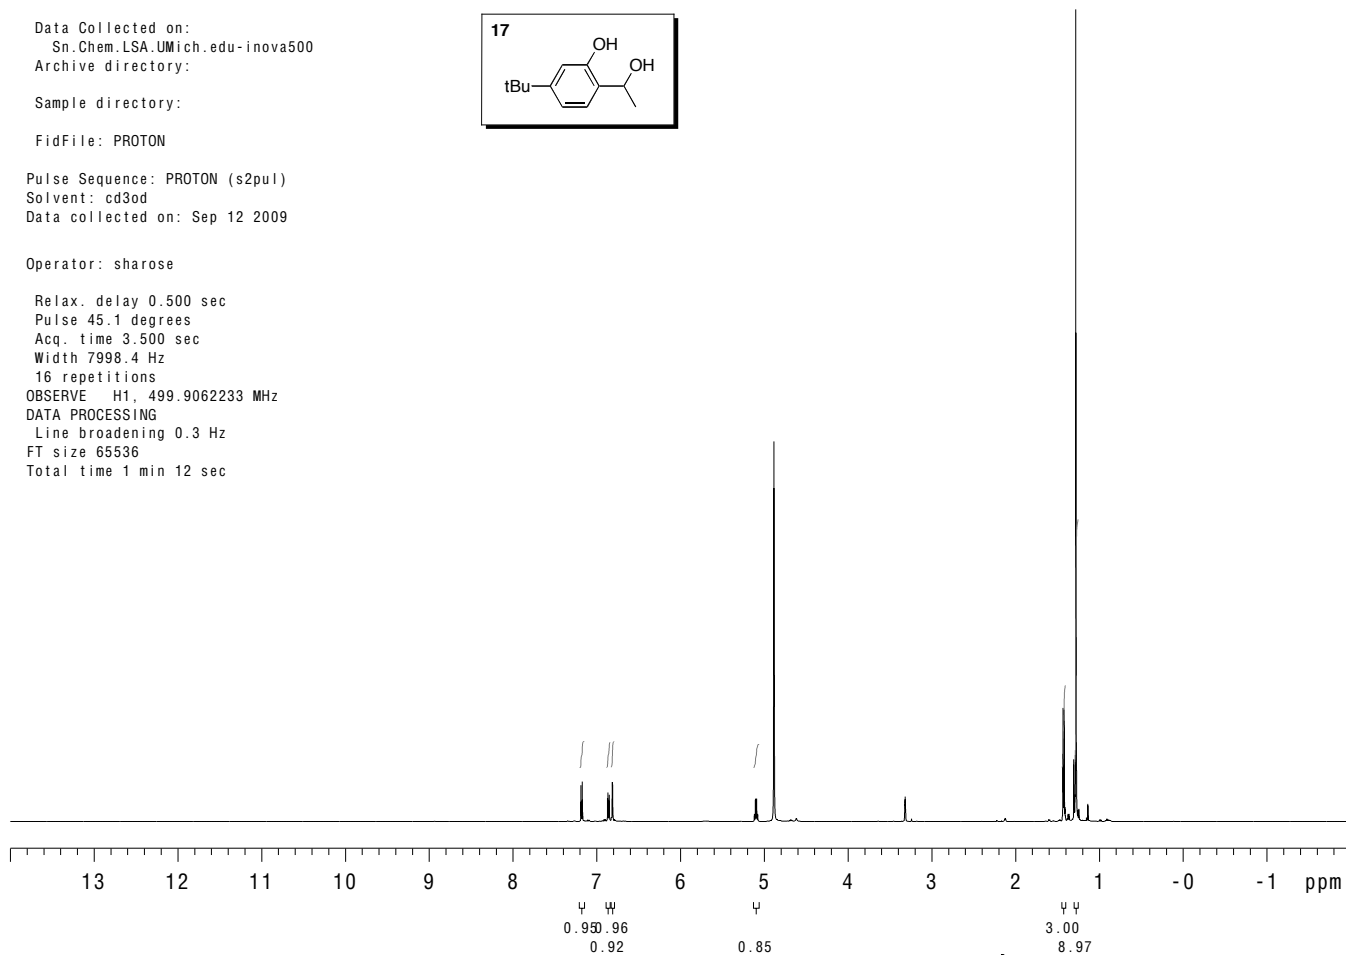

Data Collected on:  
Co.Chem.LSA.UMich.edu-vnmrs400  
Archive directory:

Sample directory:

FidFile: CARBON

Pulse Sequence: CARBON (s2pul)  
Solvent: cd3od  
Data collected on: Sep 12 2009

Temp. 25.0 C / 298.1 K  
Operator: sharose

Relax. delay 0.100 sec  
Pulse 45.0 degrees  
Acq. time 2.569 sec  
Width 25510.2 Hz  
96 repetitions  
OBSERVE C13, 100.7112321 MHz  
DECOUPLE H1, 400.5241485 MHz  
Power 41 dB  
continuously on  
WALTZ-16 modulated  
DATA PROCESSING  
Line broadening 1.0 Hz  
FT size 131072  
Total time 1 hr, 29 min

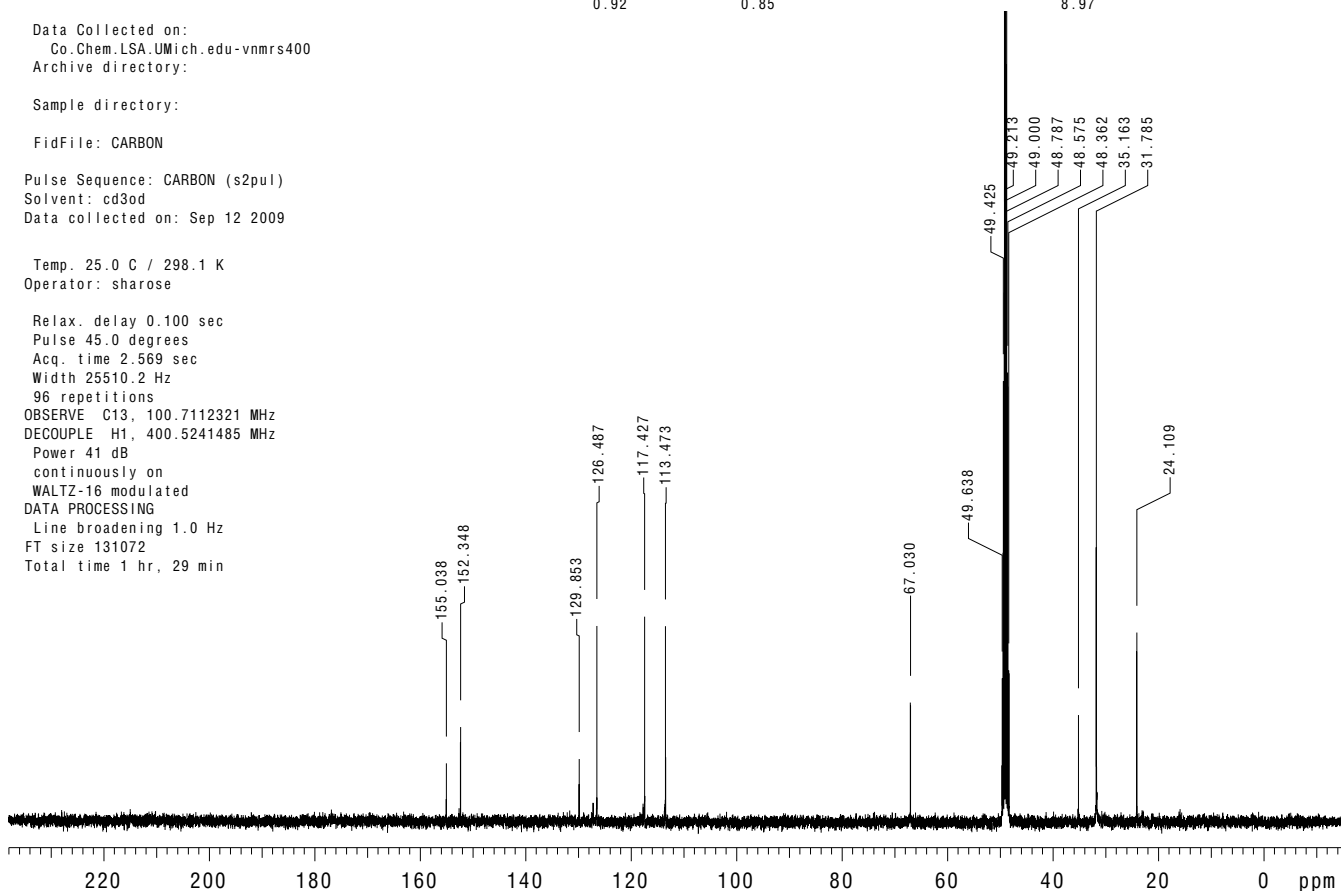

Data Collected on:  
Ga.Chem.LSA.UMich.Edu-vnmrs400  
Archive directory:

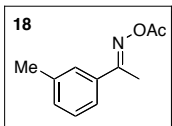

Sample directory:

FidFile: PROTON

Pulse Sequence: PROTON (s2pul)  
Solvent: cdc13  
Data collected on: Aug 17 2008

Operator: sharose

Relax. delay 1.000 sec  
Pulse 45.0 degrees  
Acq. time 2.556 sec  
Width 6410.3 Hz  
16 repetitions  
OBSERVE H1, 399.5389189 MHz  
DATA PROCESSING  
FT size 32768  
Total time 1 min 5 sec

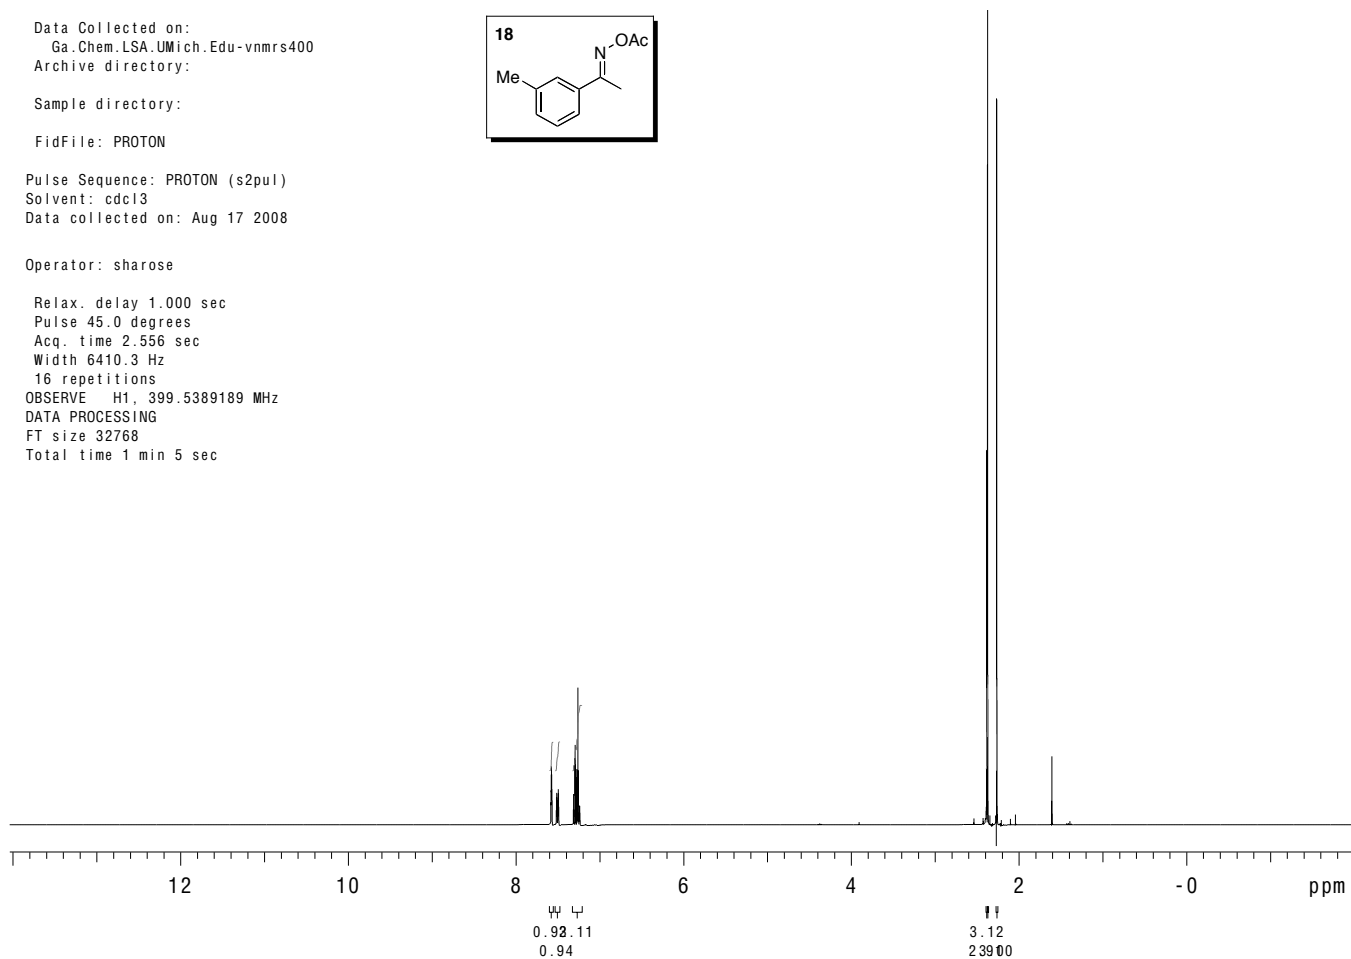

Data Collected on:  
Zr.Chem.LSA.UMich.edu-inova400  
Archive directory:  
/export/home/chempack/vnmrsys/data  
Sample directory:

FidFile: CARBON

Pulse Sequence: CARBON (s2pul)  
Solvent: cdc13  
Data collected on: Nov 10 2009

Temp. 25.0 C / 298.1 K  
Operator: sharose

Relax. delay 0.100 sec  
Pulse 45.0 degrees  
Acq. time 2.607 sec  
Width 25141.4 Hz  
32 repetitions  
OBSERVE C13, 100.5712758 MHz  
DECOUPLE H1, 399.9669644 MHz  
Power 39 dB  
continuously on  
WALTZ-16 modulated  
DATA PROCESSING  
Line broadening 1.0 Hz  
FT size 131072  
Total time 45 min

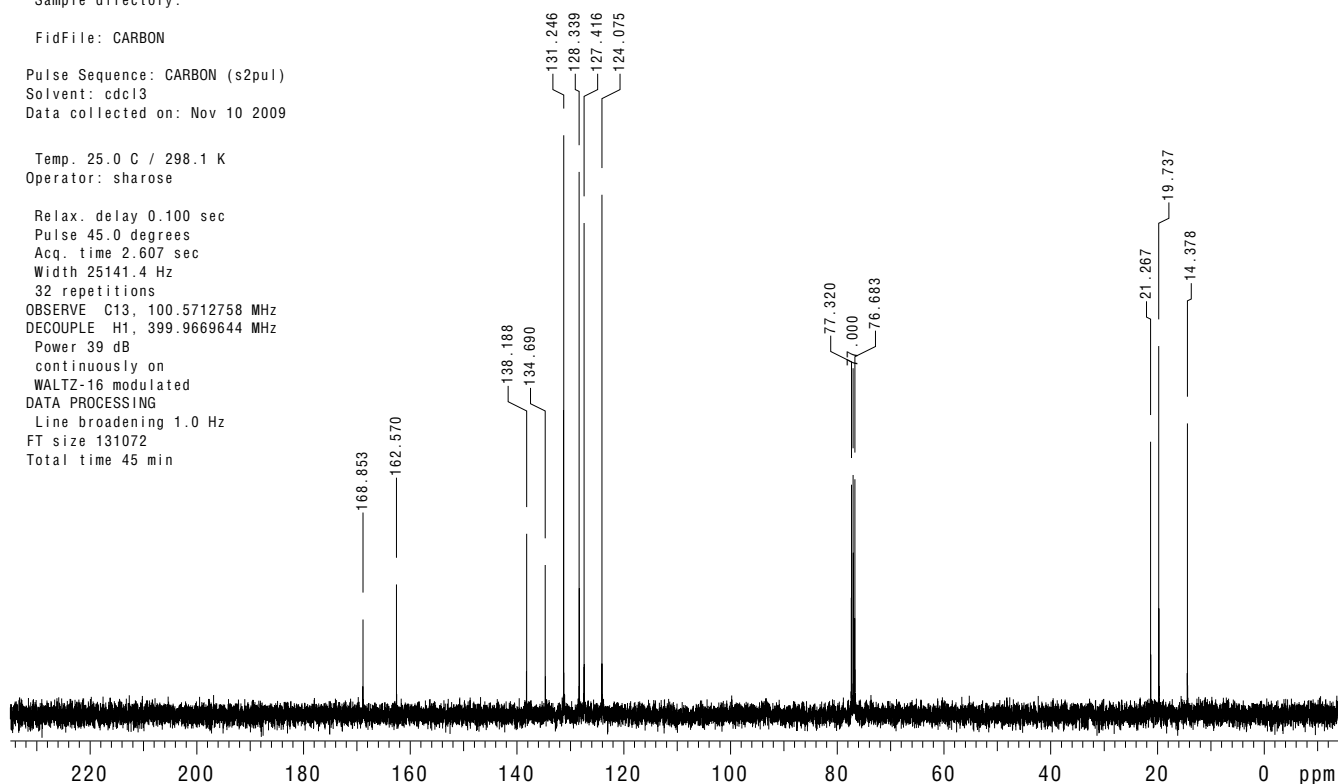

Data Collected on:  
Sn.Chem.LSA.UMich.edu-inova500  
Archive directory:

Sample directory:

FidFile: PROTON

Pulse Sequence: PROTON (s2pul)  
Solvent: cdc13  
Data collected on: Sep 11 2009

Operator: sharose

Relax. delay 0.500 sec  
Pulse 45.0 degrees  
Acq. time 3.500 sec  
Width 7998.4 Hz  
16 repetitions  
OBSERVE H1, 499.9042537 MHz  
DATA PROCESSING  
Line broadening 0.3 Hz  
FT size 65536  
Total time 1 min 12 sec

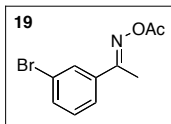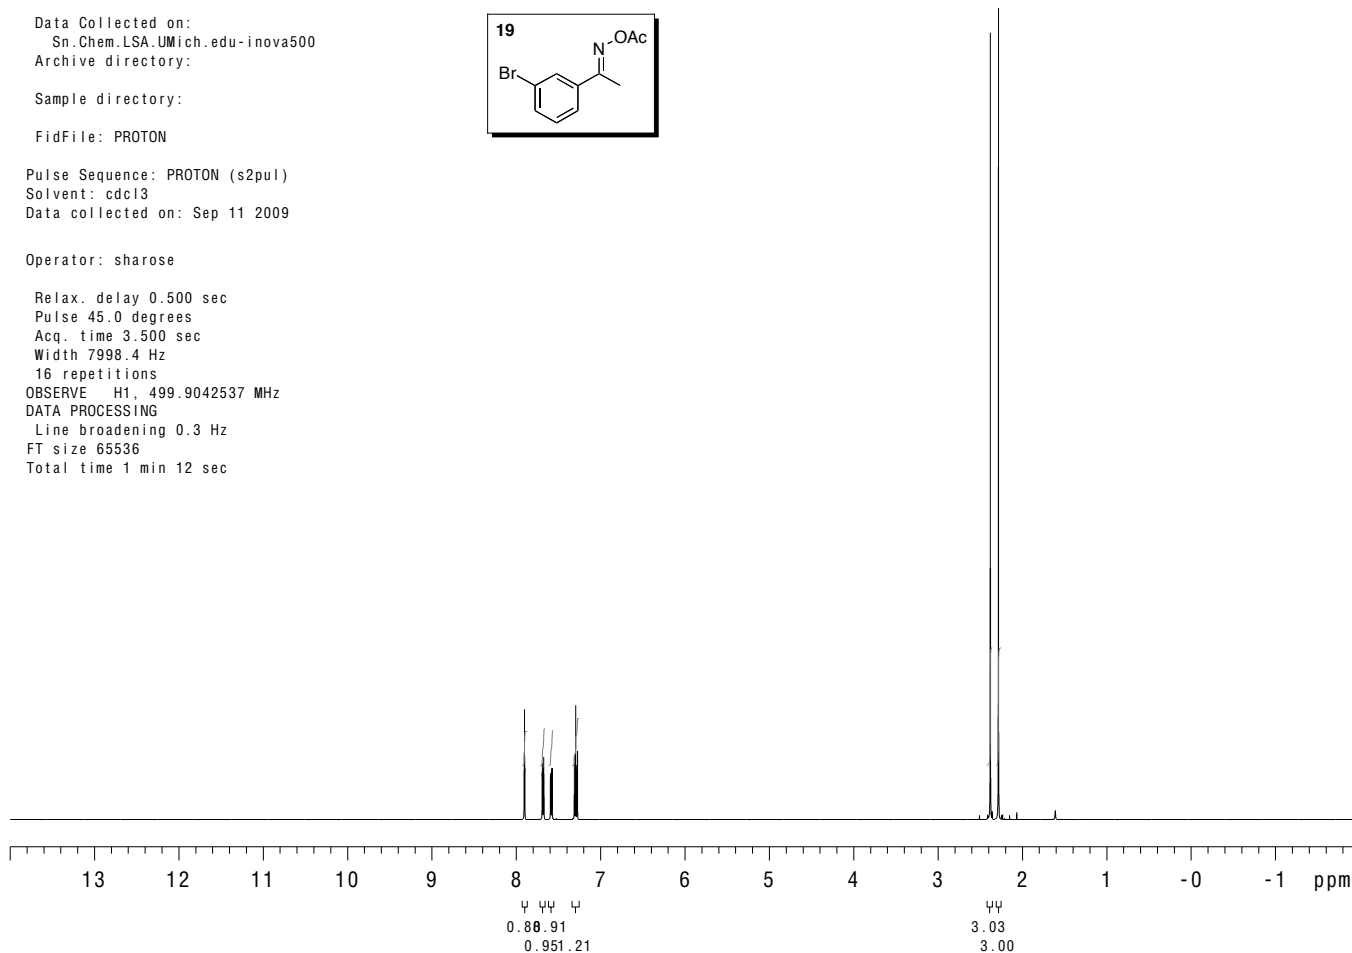

Sample directory:

FidFile: CARBON

Pulse Sequence: CARBON (s2pul)  
Solvent: cdc13  
Data collected on: Nov 10 2009

Temp. 23.0 C / 296.1 K  
Operator: sharose

Relax. delay 0.100 sec  
Pulse 45.0 degrees  
Acq. time 2.607 sec  
Width 25141.4 Hz  
80 repetitions  
OBSERVE C13, 100.5712724 MHz  
DECOUPLE H1, 399.9669644 MHz  
Power 39 dB  
continuously on  
WALTZ-16 modulated  
DATA PROCESSING  
Line broadening 1.0 Hz  
FT size 131072  
Total time 11 min

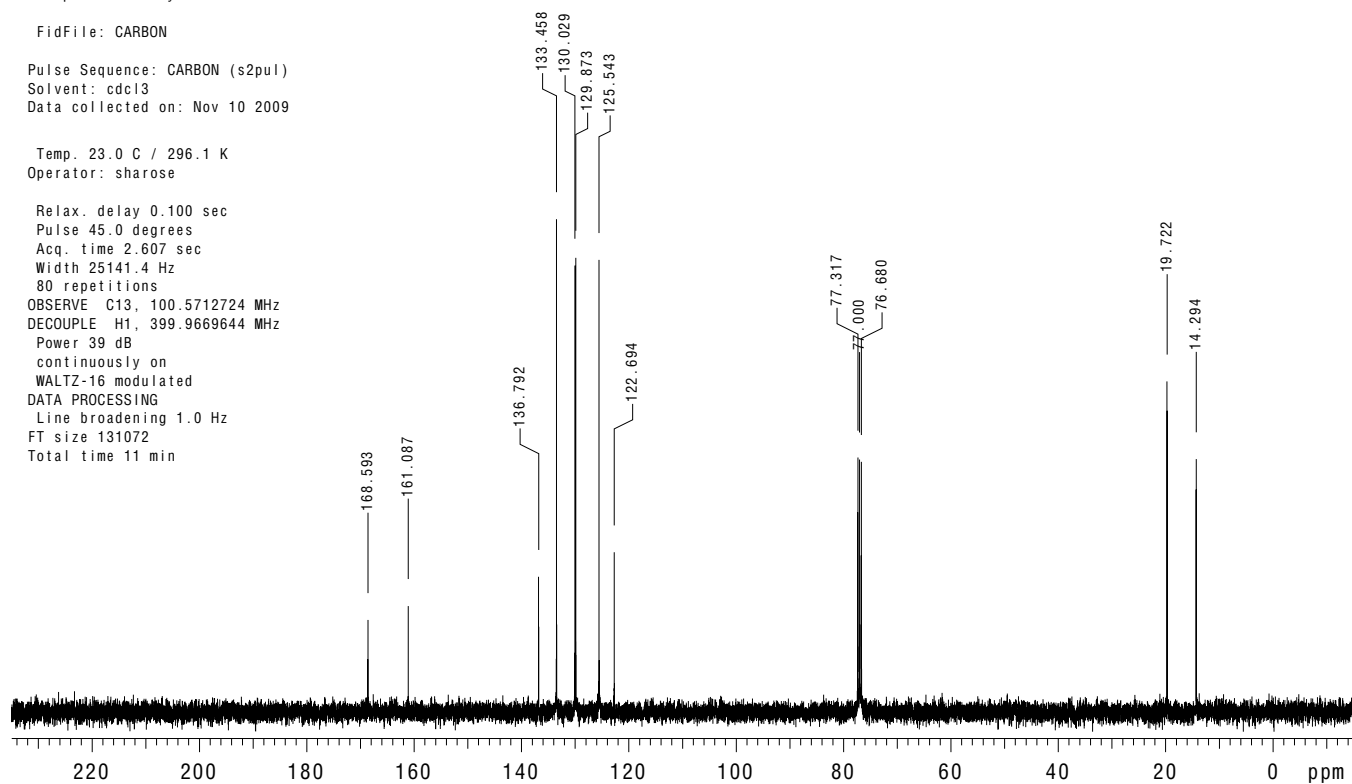

Data Collected on:  
Zr.Chem.LSA.UMich.edu-inova400  
Archive directory:

Sample directory:

FidFile: PROTON

Pulse Sequence: PROTON (s2pul)  
Solvent: cdcl3  
Data collected on: Sep 10 2009

Temp. 23.0 C / 296.1 K  
Operator: sharose

Relax. delay 0.500 sec  
Pulse 45.0 degrees  
Acq. time 3.500 sec  
Width 6399.5 Hz  
16 repetitions  
OBSERVE H1, 399.9649645 MHz  
DATA PROCESSING  
Line broadening 0.3 Hz  
FT size 65536  
Total time 1 min 12 sec

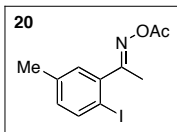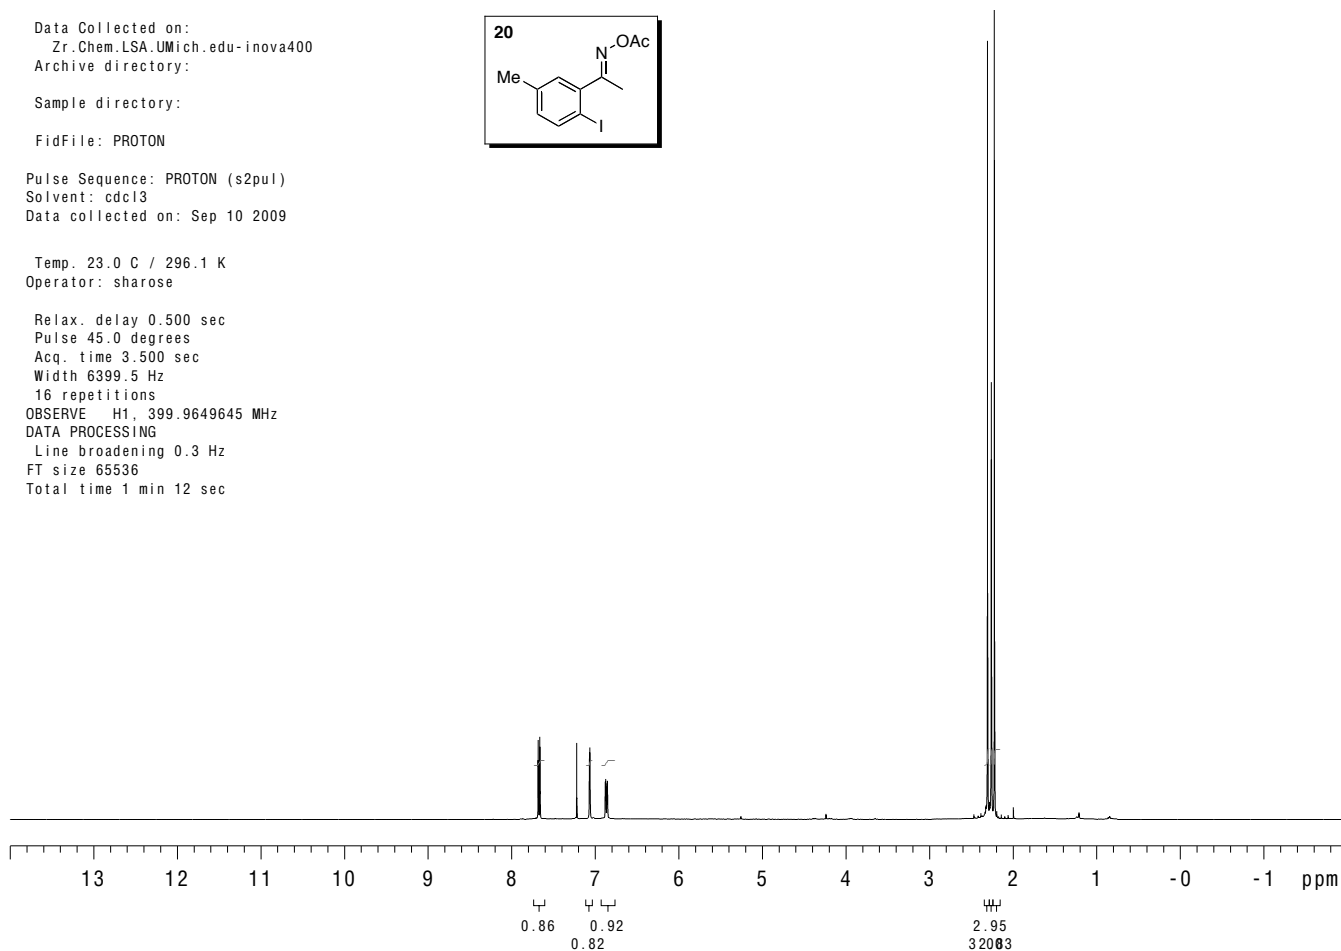

Data Collected on:  
Zr.Chem.LSA.UMich.edu-inova400  
Archive directory:

Sample directory:

FidFile: CARBON

Pulse Sequence: CARBON (s2pul)  
Solvent: cdcl3  
Data collected on: Sep 10 2009

Temp. 23.0 C / 296.1 K  
Operator: sharose

Relax. delay 0.100 sec  
Pulse 45.0 degrees  
Acq. time 2.607 sec  
Width 25141.4 Hz  
208 repetitions  
OBSERVE C13, 100.5712685 MHz  
DECOUPLE H1, 399.9669644 MHz  
Power 39 dB  
continuously on  
WALTZ-16 modulated  
DATA PROCESSING  
Line broadening 1.0 Hz  
FT size 131072  
Total time 11 min

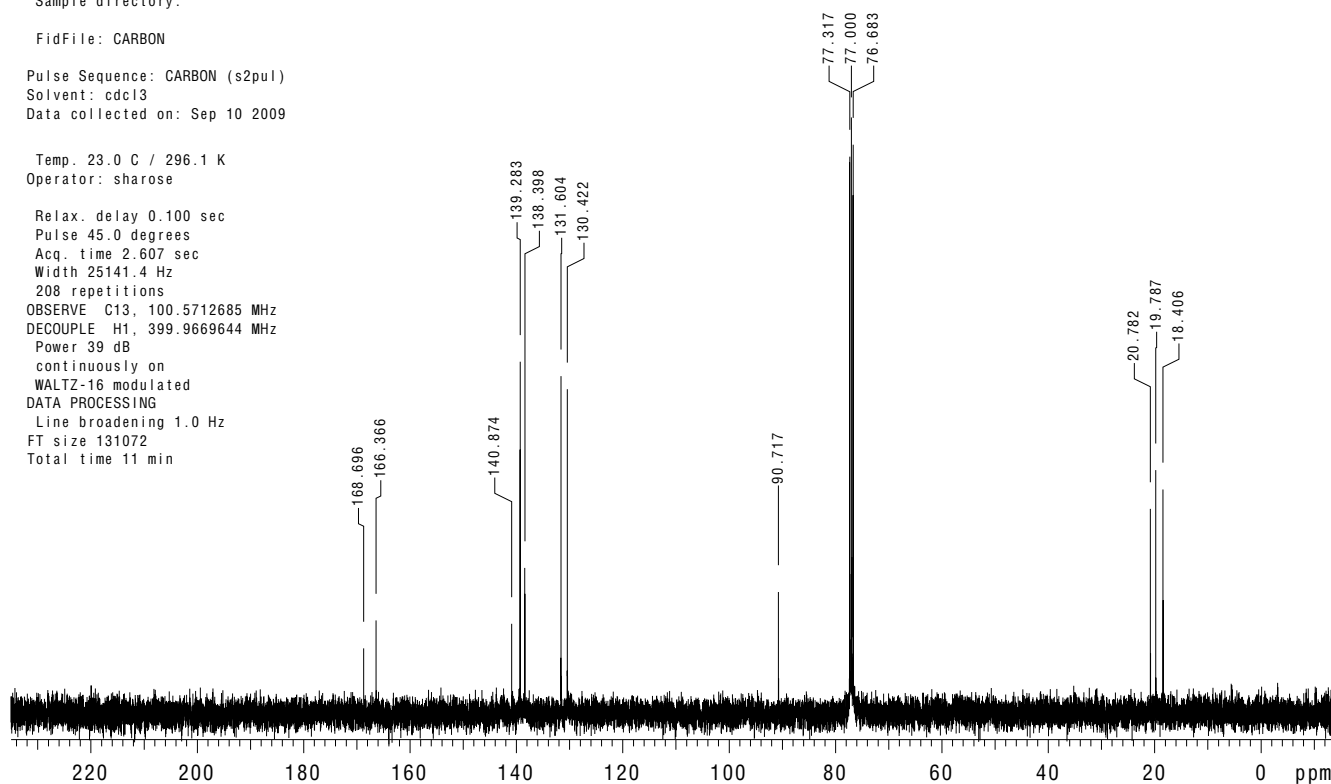



Data Collected on:  
Sn.Chem.LSA.UMich.edu-inova500  
Archive directory:

Sample directory:

FidFile: PROTON

Pulse Sequence: PROTON (s2pul)  
Solvent: cdcl3  
Data collected on: Sep 14 2009

Operator: sharose

Relax. delay 0.500 sec  
Pulse 45.0 degrees  
Acq. time 3.500 sec  
Width 7998.4 Hz  
16 repetitions  
OBSERVE H1, 499.9042609 MHz  
DATA PROCESSING  
Line broadening 0.3 Hz  
FT size 65536  
Total time 1 min 12 sec

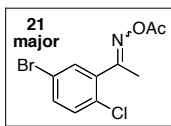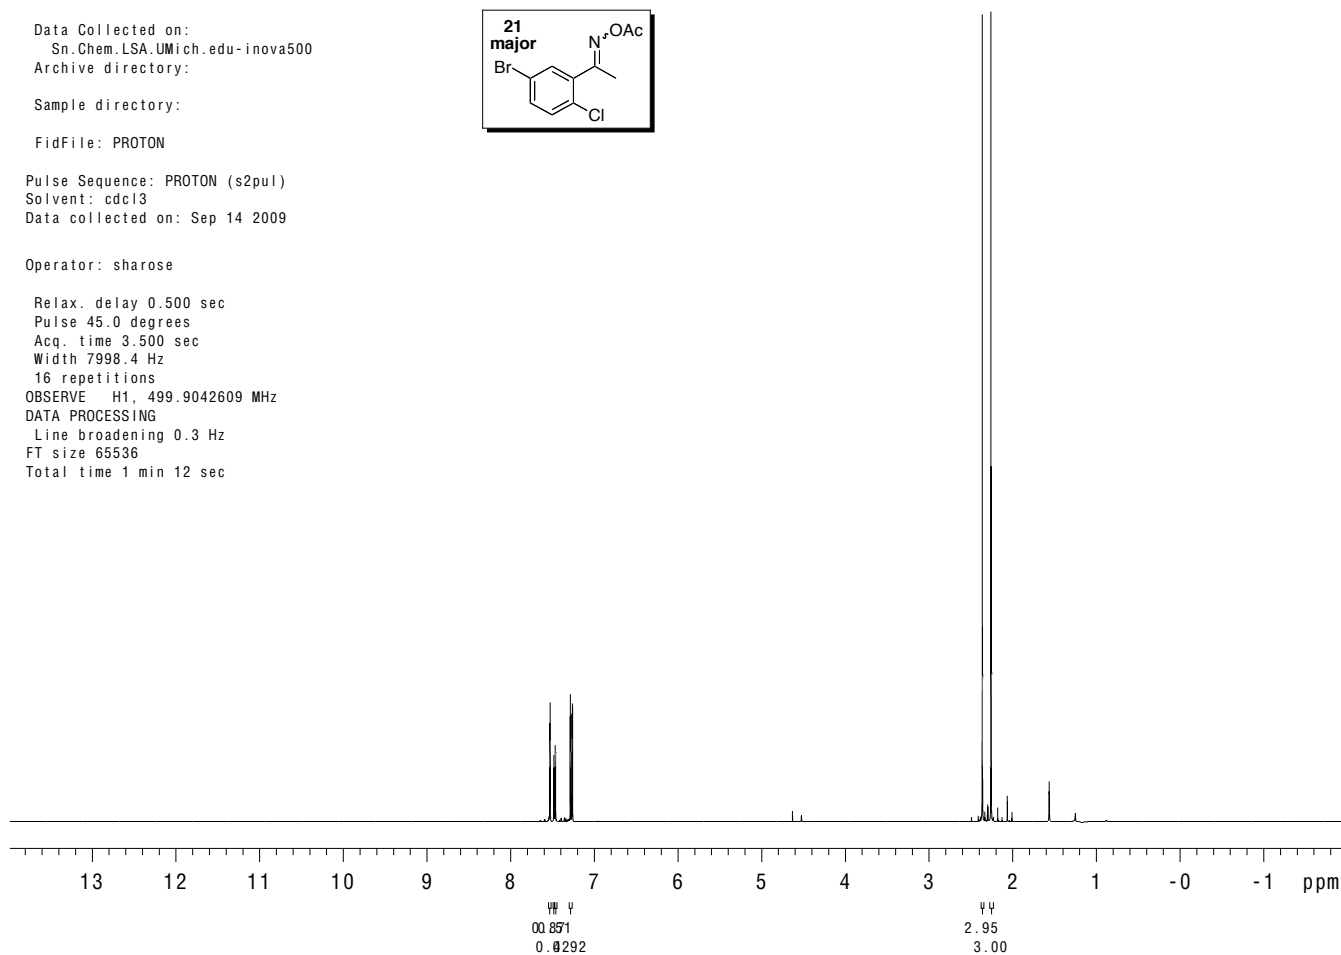

Sample directory:

FidFile: CARBON

Pulse Sequence: CARBON (s2pul)  
Solvent: cdcl3  
Data collected on: Sep 16 2009

Temp. 25.0 C / 298.1 K  
Operator: sharose

Relax. delay 0.100 sec  
Pulse 45.0 degrees  
Acq. time 2.569 sec  
Width 25510.2 Hz  
96 repetitions  
OBSERVE C13, 100.7109781 MHz  
DECOUPLE H1, 400.5225704 MHz  
Power 41 dB  
continuously on  
WALTZ-16 modulated  
DATA PROCESSING  
Line broadening 1.0 Hz  
FT size 131072  
Total time 1 hr, 29 min

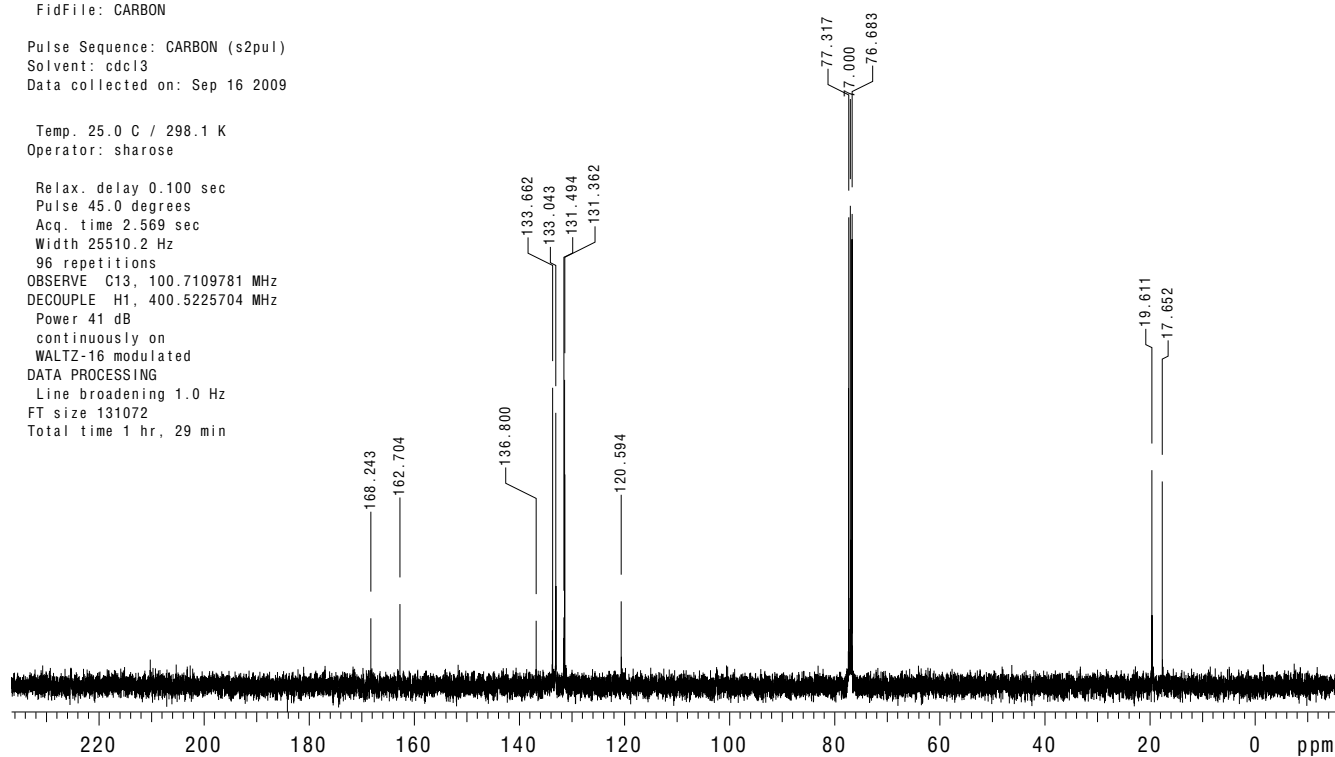

Data Collected on:  
Sn.Chem.LSA.UMich.edu-inova500  
Archive directory:

Sample directory:

FidFile: PROTON

Pulse Sequence: PROTON (s2pul)  
Solvent: cdcl3  
Data collected on: Sep 14 2009

Operator: sharose

Relax. delay 0.500 sec  
Pulse 45.0 degrees  
Acq. time 3.500 sec  
Width 7998.4 Hz  
16 repetitions  
OBSERVE H1, 499.9042809 MHz  
DATA PROCESSING  
Line broadening 0.3 Hz  
FT size 65536  
Total time 1 min 12 sec

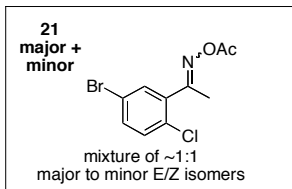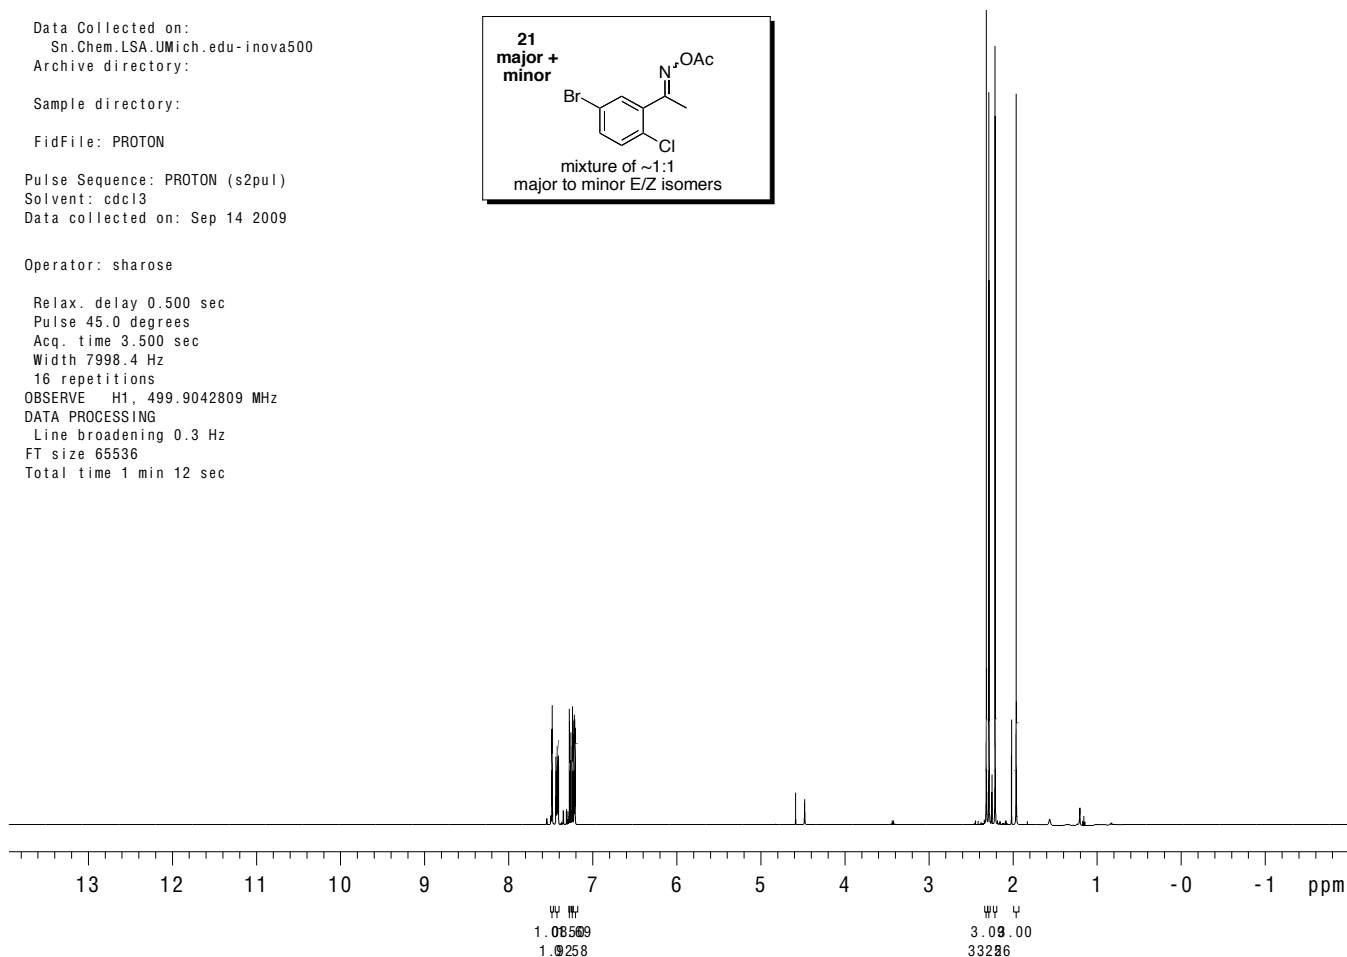

Data Collected on:  
Co.Chem.LSA.UMich.edu-vnmrs400  
Archive directory:

Sample directory:

FidFile: CARBON

Pulse Sequence: CARBON (s2pul)  
Solvent: cdcl3  
Data collected on: Sep 16 2009

Temp. 25.0 C / 298.1 K  
Operator: sharose

Relax. delay 0.100 sec  
Pulse 45.0 degrees  
Acq. time 2.569 sec  
Width 25510.2 Hz  
256 repetitions  
OBSERVE C13, 100.7109777 MHz  
DECOUPLE H1, 400.5225704 MHz  
Power 41 dB  
continuously on  
WALTZ-16 modulated  
DATA PROCESSING  
Line broadening 1.0 Hz  
FT size 131072  
Total time 44 min

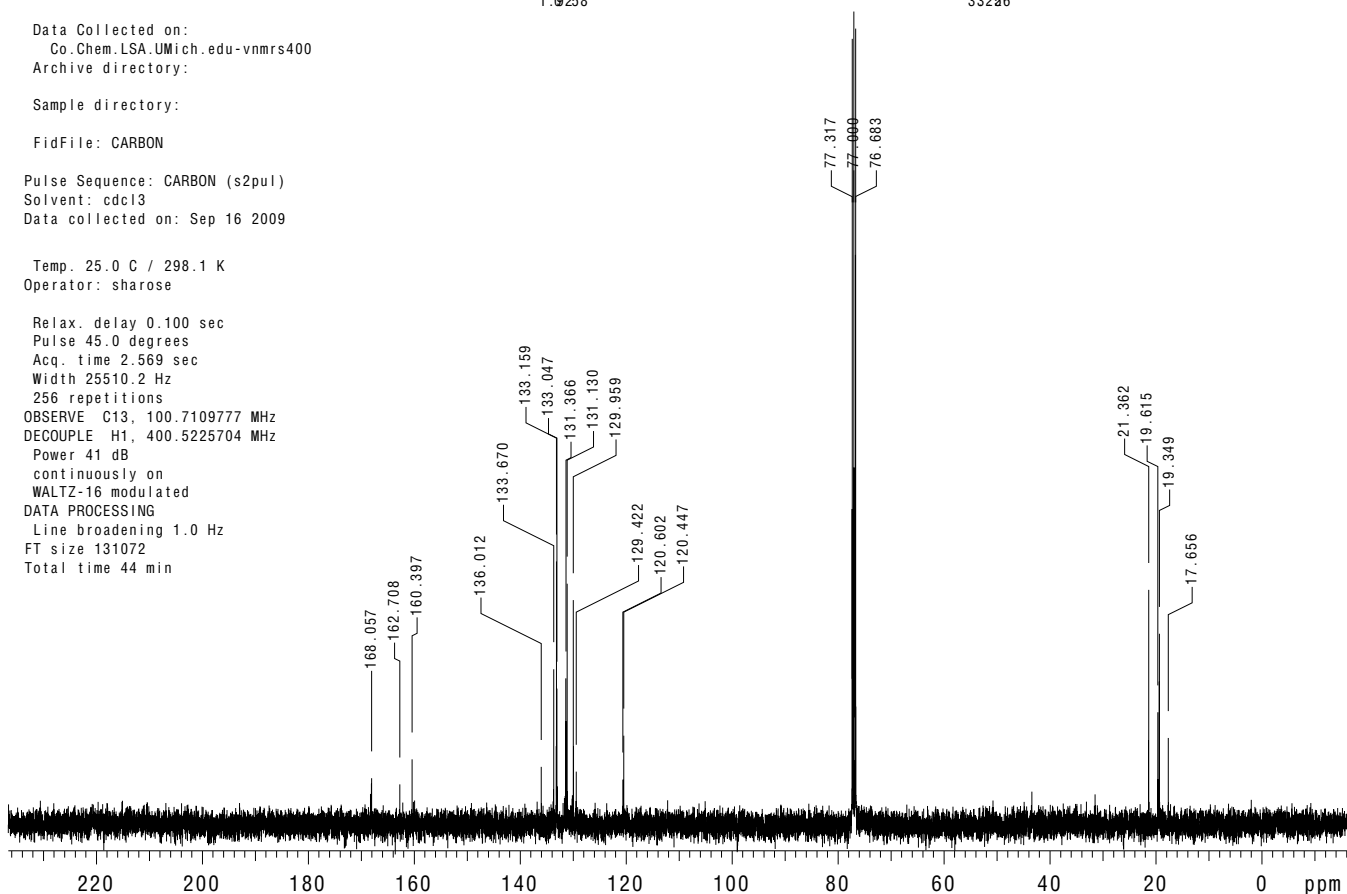

Data Collected on:  
Sn.Chem.LSA.UMich.edu-inova500  
Archive directory:

Sample directory:

FidFile: PROTON

Pulse Sequence: PROTON (s2pul)  
Solvent: cdcl3  
Data collected on: Sep 18 2009

Operator: sharose

Relax. delay 0.500 sec  
Pulse 45.0 degrees  
Acq. time 3.500 sec  
Width 7998.4 Hz  
16 repetitions  
OBSERVE H1, 499.9042606 MHz  
DATA PROCESSING  
Line broadening 0.3 Hz  
FT size 65536  
Total time 1 min 12 sec

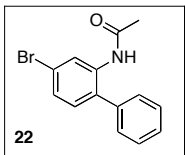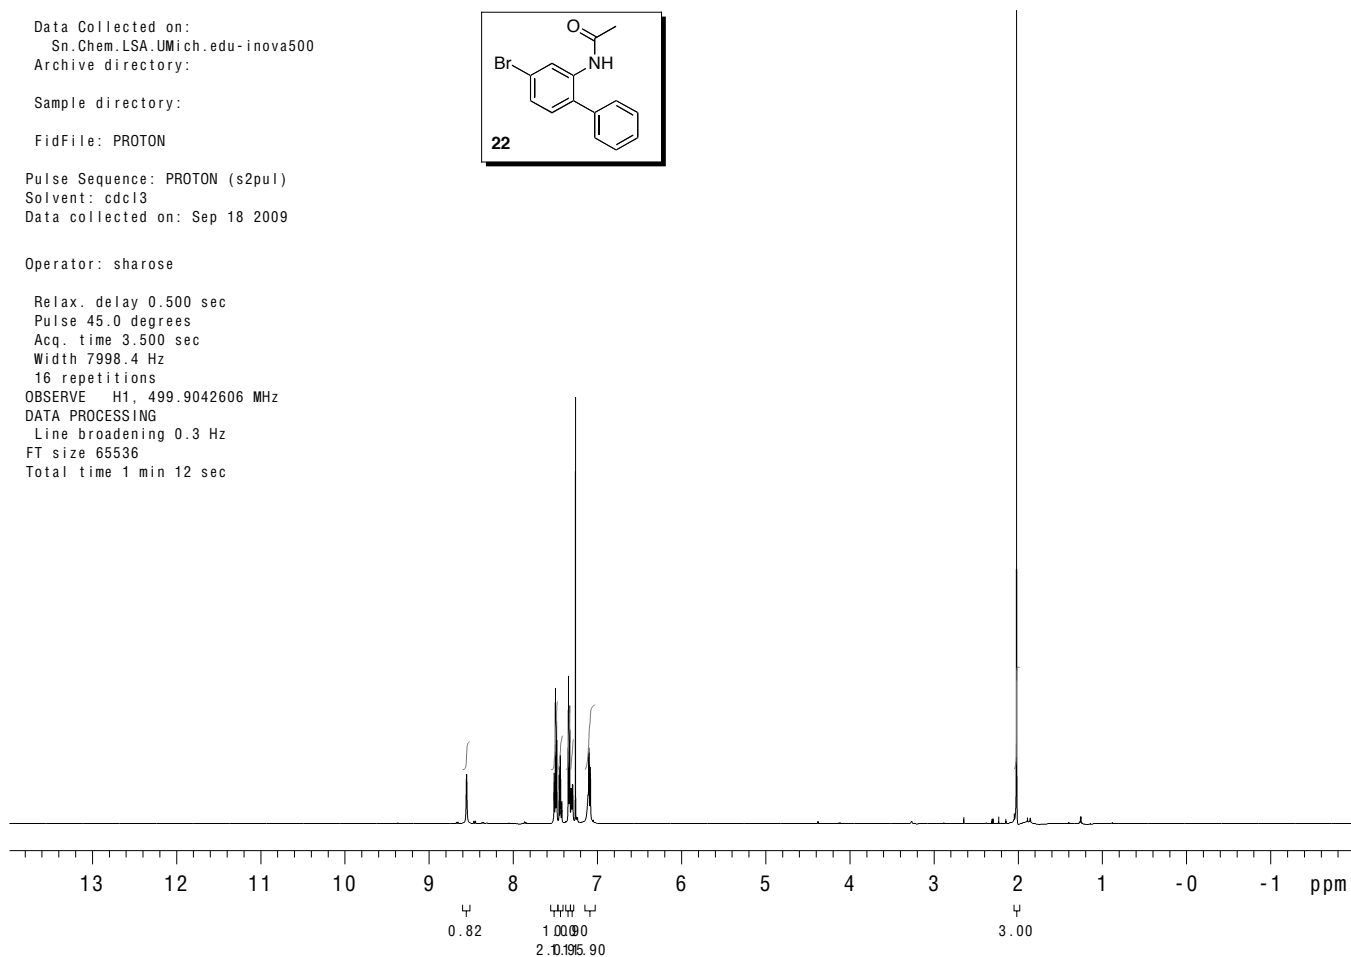

Data Collected on:  
Co.Chem.LSA.UMich.edu-vnmrs400  
Archive directory:

Sample directory:

FidFile: CARBON

Pulse Sequence: CARBON (s2pul)  
Solvent: cdcl3  
Data collected on: Sep 18 2009

Temp. 10.0 C / 283.1 K  
Operator: sharose

Relax. delay 0.100 sec  
Pulse 45.0 degrees  
Acq. time 2.569 sec  
Width 25510.2 Hz  
288 repetitions  
OBSERVE C13, 100.7109777 MHz  
DECOUPLE H1, 400.5225704 MHz  
Power 41 dB  
continuously on  
WALTZ-16 modulated  
DATA PROCESSING  
Line broadening 1.0 Hz  
FT size 131072  
Total time 44 min

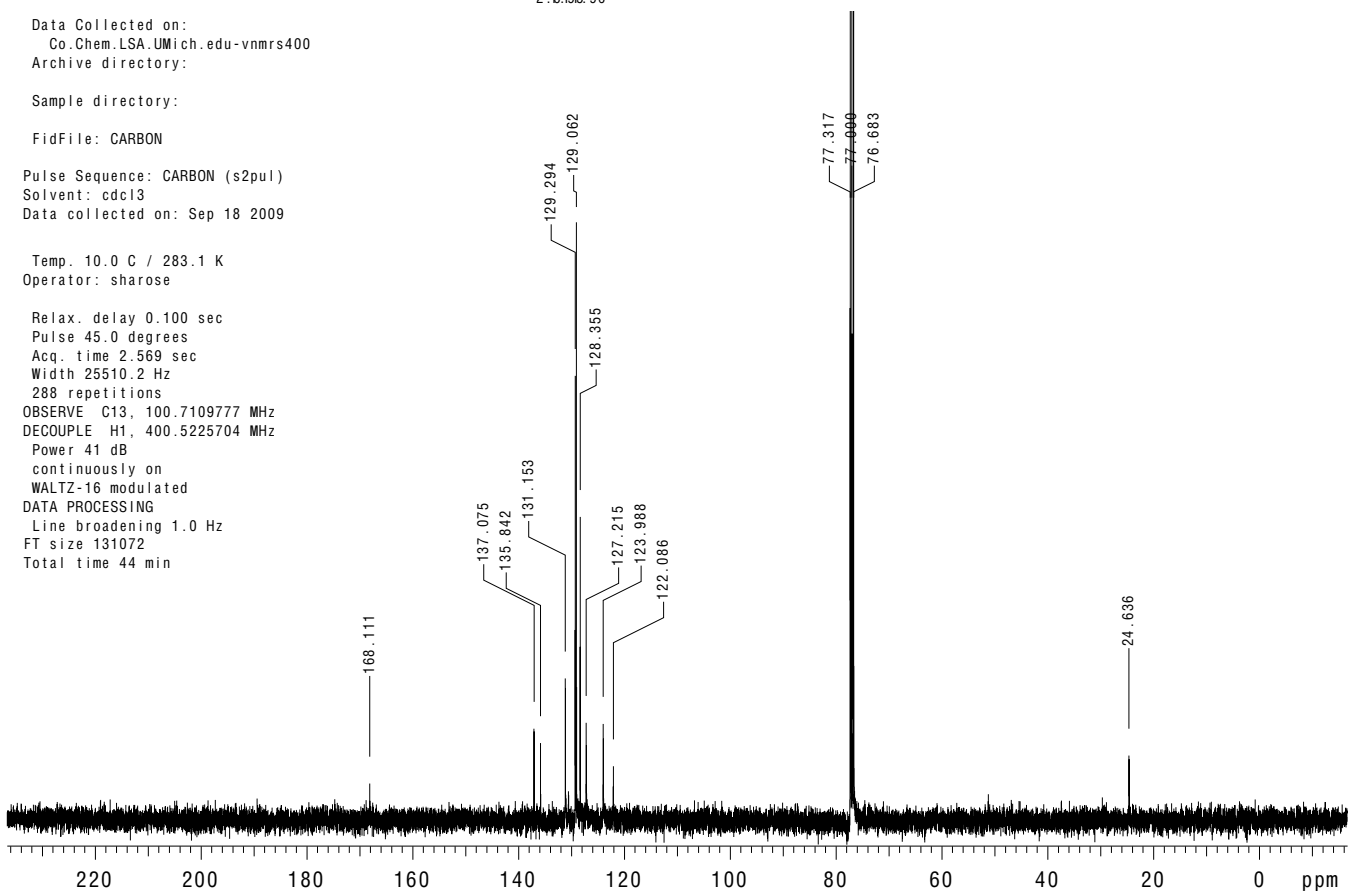

Supplement: NIHMS168016-supplement-2_si_002.pdf [file NIHMS168016-supplement-2_si_002.pdf]
